# Supplementary material for: Substrate selective synthesis of pyrazolo[1,5-a]pyridines through [3 + 2] cycloaddition of N-aminopyridines and β-nitro styrenes
Source: Royal Society of Chemistry journal article supplement (doi:10.1039/c5ra06707c), 2015-01-01
Supplement: c5ra06707c1.pdf [file c5ra06707c1.pdf]

## Supporting Information

### Substrate selective synthesis of pyrazolo[1, 5-a]pyridines through [3+2] cycloaddition of *N*-aminopyridines and $\beta$ -nitro styrenes

**Chitrakar Ravi,<sup>a</sup> Darapaneni Chandra Mohan,<sup>a</sup> N. Naresh  
Kumar Reddy<sup>a</sup> and Subbarayappa Adimurthy\*<sup>a</sup>**

<sup>a</sup>Academy of Scientific & Innovative Research, CSIR–Central Salt & Marine Chemicals  
Research Institute, G.B. Marg, Bhavnagar-364 002. Gujarat (INDIA).

\* E-mail: [adimurthy@csmcri.org](mailto:adimurthy@csmcri.org)

#### Table of Contents

|                                                               |         |
|---------------------------------------------------------------|---------|
| Experimental Section                                          | S2-21   |
| <sup>1</sup> H & <sup>13</sup> C- NMR Spectra of all products | S22-S68 |

**General Experimental Section:** All commercially available chemicals and reagents were used without any further purification unless otherwise indicated.  $^1\text{H}$  and  $^{13}\text{C}$  NMR spectra were recorded at 500, and 125 MHz, respectively. The spectra were recorded in  $\text{CDCl}_3$  as solvent. Multiplicity was indicated as follows: s (singlet); d (doublet); t (triplet); m (multiplet); dd (doublet of doublets), etc. and coupling constants ( $J$ ) were given in Hz. Chemical shifts are reported in ppm relative to TMS as an internal standard. The peaks around delta values of  $^1\text{H}$  NMR (7.26), and  $^{13}\text{C}$  NMR (77.0) correspond to deuterated solvent chloroform respectively. Mass spectra were obtained using electron impact (EI) ionization method. Progress of the reactions was monitored by thin layer chromatography (TLC). All products were purified through column chromatography using silica gel 100-200 mesh size using hexane/ethyl acetate as eluent unless otherwise indicated.

**Typical general procedure for the synthesis of Pyrazol [1,5-a]pyridine (3a):** To a reaction tube without cap equipped with a magnetic stir bar was added 1-aminopyridinium iodide **1a**, (0.3 mmol), (Z)-(2-nitroprop-1-en-1-yl)benzene **2a** (0.2 mmol), and 1.0 mL of NMP. The mixture was at room temperature under an open air in 24h. Reaction was monitored by TLC, after completion of the reaction. Then the mixture was poured into 20 mL of Hypo solution. The product was extracted with EtOAc (15 mL X 3) and dried with anhydrous  $\text{Na}_2\text{SO}_4$ . Removal of the solvent under reduced pressure the left out residue was purified by column chromatography using silica gel (10% EtOAc/hexane) to afford **3a**.

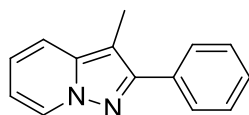

(Eluent: 5% EtOAc/hexane); 83% yield (36mg); White solid; M.p.92-97°C;  $^1\text{H}$  NMR (500 MHz,  $\text{CDCl}_3$ )  $\delta$  8.47 (d,  $J = 6.5.0$  Hz, 1H), 7.84 (d,  $J = 7.0$  Hz, 2H), 7.52-7.42 (m, 4H), 7.08 (t,  $J = 7.5$  Hz, 1H). 6.72 (t,  $J = 6.5$  Hz, 1H), 2.47 (s, 3H).  $^{13}\text{C}$  NMR (125 MHz,  $\text{CDCl}_3$ )  $\delta$

151.7, 140.6, 133.8, 128.5, 128.4, 128.2, 127.8, 122.0, 116.7, 111.4, 103.1, 8.8. HRMS calcd for C<sub>14</sub> H<sub>13</sub> N<sub>2</sub>: 209.1079. Found: 209.1070.

### 2-(4-Isopropylphenyl)-3-methylpyrazolo[1,5-a]pyridine (3b)

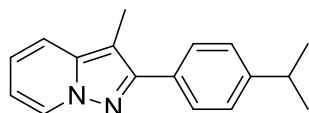

(Eluent: 5% EtOAc/hexane); 75% yield (32.7 mg); White solid; M.p.102-107°C; <sup>1</sup>H NMR (500 MHz, CDCl<sub>3</sub>) δ 8.42 (d, *J* = 7.0 Hz, 1H), 7.73 (d, *J* = 8.0 Hz, 2H), 7.43 (d, *J* = 8.5 Hz, 1H), 7.34 (t, *J* = 8.0 Hz, 2H), 7.05(t, *J* = 6.5 Hz, 1H), 6.68 (t, *J* = 6.5 Hz, 1H), 2.97 (sep, *J* = 7.0 Hz, 1H), 2.44 (s, 3H), 1.30 (d, *J* = 7.0 Hz, 6H). <sup>13</sup>C NMR (125 MHz, CDCl<sub>3</sub>) δ 148.4, 139.8, 131.2, 128.2, 128.1, 126.5, 121.8, 116.5, 11.0, 102.8, 33.8, 23.8, 8.7. HRMS calcd for C<sub>17</sub> H<sub>19</sub> N<sub>2</sub>: 251.1548. Found: 251.1559.

### 2-(4-(Tert-butyl)phenyl)-3-methylpyrazolo[1,5-a]pyridine (3c)

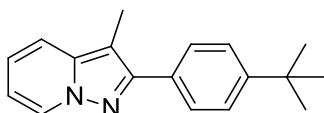

(Eluent: 10% EtOAc/hexane); 70% yield (32.9 mg); White solid; M.p.86-91°C; <sup>1</sup>H NMR (500 MHz, CDCl<sub>3</sub>) δ 8.42 (d, *J* = 7.0 Hz, 1H), 7.74 (d, *J* = 7.0 Hz, 2H), 7.50-7.41 (m, 3H), 7.05-7.02 (m, 1H), 6.68 (t, *J* = 6.5 Hz, 1H), 2.44 (s, 3H), 1.37 (s, 9H). <sup>13</sup>C NMR (125 MHz, CDCl<sub>3</sub>) δ 15.6, 15.7, 139.9, 130.9, 128.2, 128.0, 125.4, 121.8, 116.6, 111.1, 102.9, 34.6, 31.3, 8.8. HRMS calcd for C<sub>18</sub> H<sub>21</sub> N<sub>2</sub>: 265.1705. Found: 265.1701.

### 2-(4-Methoxyphenyl)-3-methylpyrazolo[1,5-a]pyridine (3d)

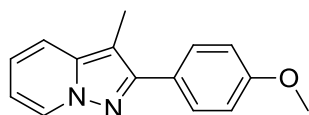

(Eluent: 5% EtOAc/hexane); 58% yield (27.5 mg); White solid; M.p.74-80°C; <sup>1</sup>H NMR (500 MHz, CDCl<sub>3</sub>) δ 8.40 (d, *J* = 7.0 Hz, 1H), 7.74 (d, *J* = 8.5 Hz, 2H), 7.41 (d, *J* = 6.0 Hz, 1H), 7.04-7.01 (m, 3H), 6.66 (t, *J* = 6.5 Hz, 1H), 3.86 (s, 3H), 2.41 (s, 3H), <sup>13</sup>C NMR (125 MHz, CDCl<sub>3</sub>) δ 159.3, 151.5, 139.9, 129.5, 128.1, 126.4, 121.9, 116.5, 113.9, 111.1, 102.6, 35.2, 8.8. HRMS calcd for C<sub>15</sub> H<sub>15</sub> N<sub>2</sub> O: 239.1184. Found: 239.1189.

### 2-(4-(Benzyloxy)phenyl)-3-methylpyrazolo[1,5-a]pyridine (3e)

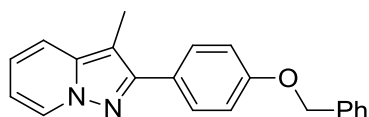

(Eluent: 5% EtOAc/hexane); 65% yield (40.8 mg); White solid; M.p.94-98°C; <sup>1</sup>H NMR (500 MHz, CDCl<sub>3</sub>) δ 8.41 (d, *J* = 7.0 Hz, 1H), 7.74 (d, *J* = 8.5 Hz, 2H), 7.47 (d, *J* = 7.0 Hz, 2H), 7.42-7.38(m, 3H), 7.33 (t, *J* = 7.5 Hz, 1H), 7.09 (d, *J* = 8.0 Hz, 2H), 7.04 (t, *J* = 7.5 Hz, 1H), , 6.67 (t, *J* = 6.5 Hz, 1H), 5.1 (s, 2H), 2.42 (s, 3H), <sup>13</sup>C NMR (125 MHz, CDCl<sub>3</sub>) δ 158.5, 151.4, 139.9, 136.9, 129.5, 128.5, 128.1, 127.9, 127.5, 126.5, 121.9, 116.5, 114.9, 111.1, 102.6, 70.6, 8.8. HRMS calcd for C<sub>21</sub> H<sub>19</sub> N<sub>2</sub> O: 315.1497. Found: 315.1511.

### 3-Methyl-2-(4-(methylthio)phenyl)pyrazolo[1,5-a]pyridine (3f)

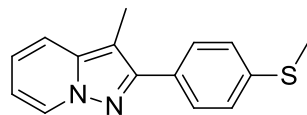

(Eluent: 5% EtOAc/hexane); 77% yield (39.4 mg); White solid; M.p.93-98°C; <sup>1</sup>H NMR (500 MHz, CDCl<sub>3</sub>) δ 8.42 (d, *J* = 6.5 Hz, 1H), 7.74 (d, *J* = 8.0 Hz, 2H), 7.43 (d, *J* = 9.0 Hz, 1H), 7.36 (d, *J* = 8.0 Hz, 2H), 7.06 (t, *J* = 8.5 Hz, 1H), 6.69 (t, *J* = 6.5 Hz, 1H), 2.53 (s, 3H), 2.43 (s, 3H), <sup>13</sup>C NMR (125 MHz, CDCl<sub>3</sub>) δ 151.1, 140.0, 1381.1, 130.6, 128.6, 128.1, 1265, 122.0, 116.6, 111.3, 103.0, 15.7, 8.8. HRMS calcd for C<sub>15</sub> H<sub>15</sub> N<sub>2</sub> S: 255.0956. Found: 255.0975.

### Biphenyl]-4-yl)-3-methylpyrazolo[1,5-a]pyridine (3g)

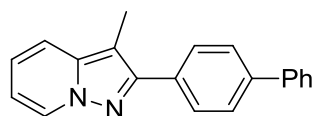

(Eluent: 5% EtOAc/hexane); 71% yield (37.6 mg); White solid; M.p.134-139°C; <sup>1</sup>H NMR (500 MHz, CDCl<sub>3</sub>) δ 8.45 (d, *J* = 7.5 Hz, 1H), 7.90 (d, *J* = 8.0 Hz, 2H), 7.72 (d, *J* = 8.5 Hz, 2H), 7.67 (d, *J* = 8.0 Hz, 2H), 7.46 (t, *J* = 7.0 Hz, 3H), 7.36 (t, *J* = 7.5 Hz, 1H), 7.07 (t, *J* = 7.5 Hz, 1H), , 6.71 (t, *J* = 6.5 Hz, 1H), 2.49 (s, 3H), <sup>13</sup>C NMR (125 MHz, CDCl<sub>3</sub>) δ 1151.3, 151.2, 140.8, 140.5, 140.0, 132.8, 128.79, 128.71, 128.2, 127.2, 127.0, 122.0, 116.7, 111.4, 103.2, 23.5, 8.9. HRMS calcd for C<sub>20</sub> H<sub>17</sub> N<sub>2</sub>: 285.1392. Found: 285.1388.

### 2-(4-Chlorophenyl)-3-methylpyrazolo[1,5-a]pyridine (3h)

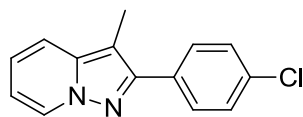

(Eluent: 5% EtOAc/hexane); 68% yield (32.6 mg); White solid; M.p.110-115°C; <sup>1</sup>H NMR (500 MHz, CDCl<sub>3</sub>) δ 8.41 (d, *J* = 7.0 Hz, 1H), 7.74 (d, *J* = 8.5 Hz, 2H), 7.44-7.41(m, 3H), 7.06 (t, *J* = 7.0 Hz, 1H), 6.70 (t, *J* = 6.5 Hz, 1H), 2.41 (s, 3H), <sup>13</sup>C NMR (125 MHz, CDCl<sub>3</sub>) δ 150.4, 140.0, 133.7, 132.3, 129.5, 128.7, 128.1, 122.1, 116.7, 111.6, 103.2, 8.8. HRMS calcd for C<sub>14</sub> H<sub>12</sub> N<sub>2</sub> Cl: 243.0689. Found: 243.0693.

### 2-(4-Fluorophenyl)-3-methylpyrazolo[1,5-a]pyridine (3i)

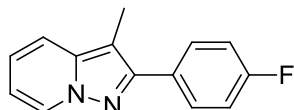

(Eluent: 5% EtOAc/hexane); 72% yield (32.7 mg); White solid; M.p.88-93°C; <sup>1</sup>H NMR (500 MHz, CDCl<sub>3</sub>) δ 8.40 (d, *J* = 7.0 Hz, 1H), 7.77-7.50 (m, 2H), 7.42 (d, *J* = 7.0 Hz, 1H), 7.15 (t,

$J = 8.0$  Hz, 2H), 7.05 (t,  $J = 7.5$  Hz, 1H), 6.69 (t,  $J = 7.0$  Hz, 1H), 2.40 (s, 3H),  $^{13}\text{C}$  NMR (125 MHz,  $\text{CDCl}_3$ )  $\delta$  163.5, 161.6, 150.7, 140.0, 130.08, 130.02, 129.1, 122.1, 116.0, 115.5, 115.3, 111.4, 102.9, 8.7. HRMS calcd for  $\text{C}_{14}\text{H}_{12}\text{N}_2\text{F}$ : 227.0565. Found: 227.0582.

#### 4-(3-Methylpyrazolo[1,5-a]pyridin-2-yl)benzonitrile (3j)

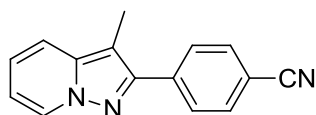

(Eluent: 5% EtOAc/hexane); 80% yield (39 mg); White solid; M.p.194-199°C;  $^1\text{H}$  NMR (500 MHz,  $\text{CDCl}_3$ )  $\delta$  8.42 (d,  $J = 7.0$  Hz, 1H), 7.94 (d,  $J = 8.5$  Hz, 2H), 7.75 (d,  $J = 8.5$  Hz, 2H), 7.47 (d,  $J = 9.0$  Hz, 1H), 7.10 (d, 6.5 Hz, 1H), 6.76 (m, 6.5 Hz, 1H), 2.45(s, 3H),  $^{13}\text{C}$  NMR (125 MHz,  $\text{CDCl}_3$ )  $\delta$  149.2, 140.1, 138.5, 132.2, 128.5, 128.1, 122.4, 118.9, 116.9, 111.1, 103.9, 8.8. HRMS calcd for  $\text{C}_{15}\text{H}_{12}\text{N}_3$ : 234.1031. Found: 234.1038.

#### 3-Methyl-2-(4-nitrophenyl)pyrazolo[1,5-a]pyridine (3k)

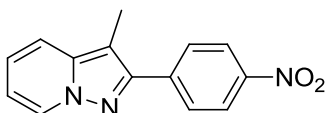

(Eluent: 5% EtOAc/hexane); 77% yield (39.2 mg); White solid; M.p.162-167°C;  $^1\text{H}$  NMR (500 MHz,  $\text{CDCl}_3$ )  $\delta$  8.44 (d,  $J = 7.0$  Hz, 1H), 8.34(d,  $J = 8.5$  Hz, 2H), 8.02 (d,  $J = 9.0$  Hz, 2H), 7.50 (d,  $J = 9.0$  Hz, 1H), 7.12 (t,  $J = 8.5$  Hz, 1H), 6.79 (t,  $J = 7.0$  Hz, 1H), 2.50 (s, 3H),  $^{13}\text{C}$  NMR (125 MHz,  $\text{CDCl}_3$ )  $\delta$  149.0, 147.1, 140.5, 140.3, 128.7, 128.2, 123.8, 122.5, 117.0, 112.4, 104.3, 9.0. HRMS calcd for  $\text{C}_{14}\text{H}_{12}\text{N}_3\text{O}_2$ : 254.0930. Found: 254.0925.

#### 3-Methyl-2-(o-tolyl)pyrazolo[1,5-a]pyridine (3m)

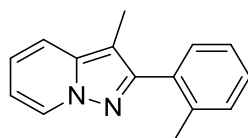

(Eluent: 5% EtOAc/hexane); 60% yield (26 mg); Liquid;  $^1\text{H}$  NMR (500 MHz,  $\text{CDCl}_3$ )  $\delta$  8.41 (d,  $J = 6.5$  Hz, 1H), 7.43(d,  $J = 9.0$  Hz, 1H), 7.34-7.25(m, 4H), 7.05 (t,  $J = 7.5$  Hz, 1H), 6.68 (t,  $J = 79.0$  Hz, 1H), 2.27(s, 3H), 2.17 (s, 3H),  $^{13}\text{C}$  NMR (125 MHz,  $\text{CDCl}_3$ )  $\delta$  153.0, 138.9, 137.3, 132.9, 130.5, 130.0, 128.19, 128.13, 125.3, 121.9, 116.5, 111.0, 104.2, 19.8, 7.9. HRMS calcd for  $\text{C}_{15}\text{H}_{15}\text{N}_2$  : 223.1235. Found: 223.1255.

### 2-(2-Methoxyphenyl)-3-methylpyrazolo[1,5-a]pyridine (3n)

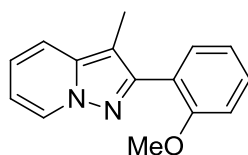

(Eluent: 5% EtOAc/hexane); 64% yield (30.5 mg); Liquid;  $^1\text{H}$  NMR (500 MHz,  $\text{CDCl}_3$ )  $\delta$  8.44 (d,  $J = 6.5$  Hz, 1H), 7.46-7.40(m, 3H), 7.06-7.01(m, 3H), 6.66 (t,  $J = 7.0$  Hz, 1H), 3.84(s,3H), 2.21 (s, 3H),  $^{13}\text{C}$  NMR (125 MHz,  $\text{CDCl}_3$ )  $\delta$  157.2, 150.2, 139.1, 131.9, 129.6, 128.2, 122.6, 121.8, 120.5, 116.7, 110.98, 110.90, 105.3, 55.4, 8.3. HRMS calcd for  $\text{C}_{15}\text{H}_{15}\text{N}_2\text{O}_2$ : 239.1184. Found: 239.1183.

### 3-Methyl-2-(2-(trifluoromethyl)phenyl)pyrazolo[1,5-a]pyridine (3o)

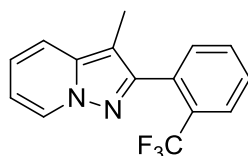

(Eluent: 5% EtOAc/hexane); 79% yield (41 mg); White solid; M.p.88-94°C;  $^1\text{H}$  NMR (500 MHz,  $\text{CDCl}_3$ )  $\delta$  8.40 (d,  $J = 7.0$  Hz, 1H), 7.80(d,  $J = 8.0$  Hz, 1H), 7.59 (t,  $J = 7.5$  Hz, 1H), 7.53 (t,  $J = 7.5$  Hz, 1H), 7.43 (d,  $J = 8.5$  Hz, 2H), 7.07(t  $J = 7.0$  Hz, 1H), 6.71 (t,  $J = 7.0$  Hz, 1H), 2.13 (s, 3H),  $^{13}\text{C}$  NMR (125 MHz,  $\text{CDCl}_3$ )  $\delta$  150.7, 138.6, 132.6, 131.1, 130.1, 129.9, 128.4, 126.15, 126.11, 122.1, 116.7, 111.4, 105.1, 7.5. HRMS calcd for  $\text{C}_{15}\text{H}_{12}\text{N}_2\text{F}_3$  : 277.0953. Found: 277.0943.

### 3-Methyl-2-(2-nitrophenyl)pyrazolo[1,5-a]pyridine (3p)

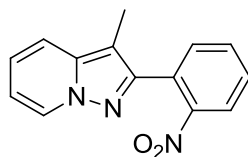

(Eluent: 5% EtOAc/hexane); 87% yield (43.9 mg); Liquid;  $^1\text{H}$  NMR (500 MHz,  $\text{CDCl}_3$ )  $\delta$  8.31 (d,  $J = 7.0$  Hz, 1H), 7.91(d,  $J = 8.5$  Hz, 1H), 7.60 (t,  $J = 7.0$  Hz, 1H), 7.55 (d,  $J = 7.5$  Hz, 1H), 7.50-7.46(m,1H), 7.37 (d,  $J = 8.5$  Hz, 1H), 7.01 (t,  $J = 8.0$  Hz, 1H), 6.66 (t,  $J = 8.0$  Hz, 1H), 2.13 (s, 3H),  $^{13}\text{C}$  NMR (125 MHz,  $\text{CDCl}_3$ )  $\delta$  149.7, 148.4, 139.2, 132.7, 132.3, 129.0,128.0, 128.2, 124.2, 122.4, 116.9, 11.7, 104.6, 7.7. HRMS calcd for  $\text{C}_{14}\text{H}_{12}\text{N}_3\text{O}_2$  : 254.0930. Found: 254.0939.

### 3-Methyl-2-(3-nitrophenyl)pyrazolo[1,5-a]pyridine (3q)

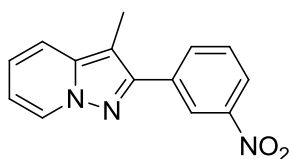

(Eluent: 5% EtOAc/hexane); 90% yield (45.3 mg); White solid; M.p.136-141°C;  $^1\text{H}$  NMR (500 MHz,  $\text{CDCl}_3$ )  $\delta$  8.69 (s, 1H), 8.44 (d,  $J = 7.0$  Hz, 1H), 8.25(d,  $J = 7.0$  Hz, 1H), 7.18 (d,  $J = 7.5$  Hz, 1H), 7.65 (t,  $J = 8.0$  Hz, 1H), 7.50 (d,  $J = 9.0$  Hz, 1H), 7.12(t,  $J = 9.0$  Hz, 1H), 6.78 (t,  $J = 7.0$  Hz, 1H), 2.50 (s, 3H),  $^{13}\text{C}$  NMR (125 MHz,  $\text{CDCl}_3$ )  $\delta$  167.3, 149.0, 148.4, 135.7, 134.0, 129.4, 128.2, 123.0, 122.5, 117.0,112.2, 103.7, 8.8. HRMS calcd for  $\text{C}_{14}\text{H}_{12}\text{N}_3\text{O}_2$  : 254.0930. Found: 254.0934.

### 2-(3,4-Dimethylphenyl)-3-methylpyrazolo[1,5-a]pyridine (3r)

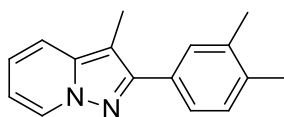



(Eluent: 5% EtOAc/hexane); 58% yield (27.3 mg); White solid; M.p.78-83°C; <sup>1</sup>H NMR (500 MHz, CDCl<sub>3</sub>) δ 8.42 (d, *J* = 7.0 Hz, 1H), 7.60(s, 1H), 7.51(d, *J* = 7.5 Hz, 1H), 7.42 (d, *J* = 9.0 Hz, 1H), 7.24 (t, *J* = 7.5 Hz, 1H), 7.03 (t, *J* = 7.0 Hz, 1H), 6.67 (t, *J* = 7.0 Hz, 1H), 2.43(s,3H), 2.34(s, 3H), 2.32 (s, 3H), <sup>13</sup>C NMR (125 MHz, CDCl<sub>3</sub>) δ 151.8, 149.9, 136.7, 136.3, 131.3, 129.7, 129.5, 128.1, 125.8, 121.9, 116.6, 111.1, 102.9, 19.8, 19.6, 8.8. HRMS calcd for C<sub>16</sub> H<sub>17</sub> N<sub>2</sub> : 237.1392. Found: 237.1383.

### 2-(2,3-Dimethoxyphenyl)-3-methylpyrazolo[1,5-a]pyridine(3s)

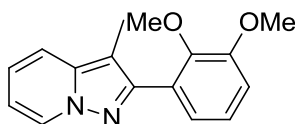

(Eluent: 5% EtOAc/hexane); 63% yield (34.1 mg); White solid; M.p.125-130°C; <sup>1</sup>H NMR (500 MHz, CDCl<sub>3</sub>) δ 8.43 (d, *J* = 7.0 Hz, 1H), 7.45(d, *J* = 8.5 Hz, 1H), 7.14 (t, *J* = 8.0 Hz, 1H), 7.09-7.04(m, 2H), 7.00-6.98(m, 1H), 6.69(t, *J* = 7.0 Hz, 1H), 3.92(s, 3H), 3.60(s, 3H), 2.25(s, 3H). <sup>13</sup>C NMR (125 MHz, CDCl<sub>3</sub>) δ 151.6, 148.9, 146.4, 137.8, 127.0, 126.9, 122.6, 122.4, 120.5, 115.6, 111.1, 109.8, 104.3, 59.8, 54.6, 7.09. HRMS calcd for C<sub>16</sub> H<sub>17</sub> N<sub>2</sub>O<sub>3</sub> : 269.1290. Found: 269.1292.

### 2-(2,4-Dimethoxyphenyl)-3-methylpyrazolo[1,5-a]pyridine (3t)

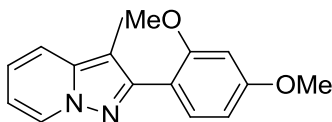

(Eluent: 5% EtOAc/hexane); 62% yield (33.2 mg); White solid; M.p.89-95°C; <sup>1</sup>H NMR (500 MHz, CDCl<sub>3</sub>) δ 8.41 (d, *J* = 7.0 Hz, 1H), 7.41-7.37(m, 2H), 7.02(t, *J* = 7.0 Hz, 1H), 6.64 (t, *J* = 7.5 Hz, 1H), 6.61-6.58(m,2H), 3.86(s,3H), 3.81(s, 3H), 2.20(s, 3H). <sup>13</sup>C NMR (125 MHz, CDCl<sub>3</sub>) δ 161.4, 158.6, 150.4, 139.3, 132.6, 128.4, 121.9, 116.8, 115.6, 111.0, 105.4, 104.7, 98.9, 55.7, 55.6, 8.5. HRMS calcd for C<sub>16</sub> H<sub>17</sub> N<sub>2</sub>O<sub>2</sub> : 269.1290. Found: 269.1297.

### 2-(2,5-Dimethoxyphenyl)-3-methylpyrazolo[1,5-a]pyridine (3u)

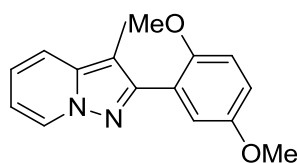

(Eluent: 5% EtOAc/hexane); 61% yield (33 mg); Liquid;  $^1\text{H}$  NMR (500 MHz,  $\text{CDCl}_3$ )  $\delta$  8.42 (d,  $J = 7.0$  Hz, 1H), 7.43(d,  $J = 9.0$  Hz, 1H), 7.05-7.02(m, 2H), 6.949s, 2H), 6,64 (t,  $J = 7.0$  Hz, 1H), 3.80 (s, 3H), 3.77 (s, 3H), 2.22 (s, 3H),  $^{13}\text{C}$  NMR (125 MHz,  $\text{CDCl}_3$ )  $\delta$  153.6, 151.8, 150.3, 139.3, 128.4, 123.5, 112.1, 117.6, 116.9, 115.3, 113.5, 111.2, 105.6, 56.3, 56.0, 8.5. HRMS calcd for  $\text{C}_{16}\text{H}_{17}\text{N}_2\text{O}_2$  : 269.1290 Found: 269.1273.

### 2-(3,4-Dimethoxyphenyl)-3-methylpyrazolo[1,5-a]pyridine (3v)

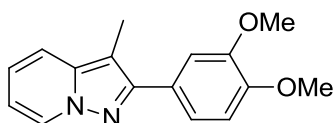

(Eluent: 5% EtOAc/hexane); 60% yield (32 mg); White solid; M.p.88-93°C;  $^1\text{H}$  NMR (500 MHz,  $\text{CDCl}_3$ )  $\delta$  8.42 (d,  $J = 7.0$  Hz, 1H), 7.43-39 (m, 2H), 7.34-7.31 (m, 1H), 7.05 (t,  $J = 9.0$  Hz, 1H), 6.99 (t,  $J = 7.0$  Hz, 1H), 6.69(t  $J = 7.0$  Hz, 1H), 3.97 (s, 3H), 3.94(s, 3H), 2.44 (s, 3H),  $^{13}\text{C}$  NMR (125 MHz,  $\text{CDCl}_3$ )  $\delta$  151.5, 148.9, 148.5, 140.6, 128.1, 126.6, 122.0, 120.9, 116.5, 111.4, 111.2, 111.0, 102.7, 55.9, 8.9. HRMS calcd for  $\text{C}_{16}\text{H}_{17}\text{N}_2\text{O}_2$  : 269.1290 Found: 269.1290.

### 2-(3,5-Dimethoxyphenyl)-3-methylpyrazolo[1,5-a]pyridine (3w)

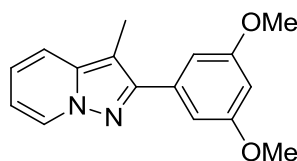

. (Eluent: 5% EtOAc/hexane); 71% yield (37.6 mg); White solid; M.p.64-69°C; <sup>1</sup>H NMR (500 MHz, CDCl<sub>3</sub>) δ 8.42 (d, *J* = 7.0 Hz, 1H), 7.43(d, *J* = 9.0 Hz, 1H), 7.04 (t, *J* = 9.0 Hz, 1H), 6.96(s, 1H), 6.70-6.68(m,1H), 6.51 (t, *J* = 7.0 Hz, 1H), 3.86(s, 6H), 2.44 (s, 3H), <sup>13</sup>C NMR (125 MHz, CDCl<sub>3</sub>) δ 160.7, 151.4, 139.9, 135.6, 128.1, 122.0, 116.7, 111.4, 106.3, 103.2, 100.2, 55.3, 8.8. HRMS calcd for C<sub>16</sub> H<sub>17</sub> N<sub>2</sub>O<sub>2</sub> : 269.1290. Found: 269.1270.

### 3-Methyl-2-(2,4,6-trimethoxyphenyl)pyrazolo[1,5-a]pyridine (3x)

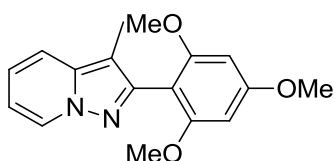

(Eluent: 5% EtOAc/hexane); 38% yield (22.7 mg); White solid; M.p.88-93°C; <sup>1</sup>H NMR (500 MHz, CDCl<sub>3</sub>) δ 8.42 (d, *J* = 7.0 Hz, 1H), 7.41(d, *J* = 4.0 Hz, 1H), 7.05-6.98(m, 1H), 6.63-6.61(m,1H), 6.24(s, 2H), 3.87(s, 3H), 3.74(s, 6H), 2.10(s,3H), <sup>13</sup>C NMR (125 MHz, CDCl<sub>3</sub>) δ 160.4, 158.4, 145.5, 137.5, 127.2, 120.1, 115.5, 109.2, 105.5, 102.4, 89.4, 54.7, 54.1, 6.7. HRMS calcd for C<sub>17</sub> H<sub>19</sub> N<sub>2</sub>O<sub>3</sub> : 299.1396. Found: 299.1415.

### 3-Methyl-2-(4-(pyridin-2-yl)phenyl)pyrazolo[1,5-a]pyridine (3y)

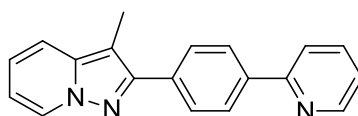

(Eluent: 5% EtOAc/hexane); 38% yield (20.5 mg); White solid; M.p.116-121°C; <sup>1</sup>H NMR (500 MHz, CDCl<sub>3</sub>) δ 8.72 (d, *J* = 6.5 Hz, 1H), 7.45(d, *J* = 7.0 Hz, 1H), 8.12 (d, *J* = 8.0 Hz, 2H), 7.94 (d, *J* = 8.0 Hz, 2H), 7.80-7.77(m,2H), 7.46 (d, *J* = 9.0 Hz, 1H), 7.26-7.23(m,1H), 7.07(t, *J* = 7.0 Hz, 1H), 6.50 (t, *J* = 7.0 Hz, 1H), 2.48 (s, 3H), <sup>13</sup>C NMR (125 MHz, CDCl<sub>3</sub>) δ 17.0, 151.0, 149.6, 140.0, 138.6, 136.7, 134.4, 128.6, 128.1, 127.0, 122.1, 120.5, 116.7, 111.5, 103.5, 8.9. HRMS calcd for C<sub>19</sub> H<sub>16</sub> N<sub>3</sub> : 286.1344. Found: 286.1335.

### 3-Methyl-2-(naphthalen-1-yl)pyrazolo[1,5-a]pyridine (3z)

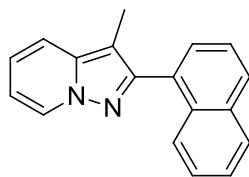

(Eluent: 5% EtOAc/hexane); 55% yield (28.3 mg); White solid; M.p.140-145°C;  $^1\text{H}$  NMR (500 MHz,  $\text{CDCl}_3$ )  $\delta$  8.52 (d,  $J = 7.0$  Hz, 1H), 7.95-7.92(m,3H), 7.62-7.57(m, 2H), 7.52-7.45(m,3H), 7.13(t,  $J = 8.5$  Hz, 1H), 6.77 (t,  $J = 7.0$  Hz, 1H), 2.21 (s, 3H),  $^{13}\text{C}$  NMR (125 MHz,  $\text{CDCl}_3$ )  $\delta$  151.8, 139.2, 133.6, 132.2, 131.1, 128.5, 128.3, 128.1, 126.2, 125.7, 125.1, 122.1, 116.7, 111.3, 105.3, 8.2. HRMS calcd for  $\text{C}_{18}\text{H}_{15}\text{N}_2$  : 259.1235. Found: 259.1245.

### 3-Methyl-2-(pyridin-4-yl)pyrazolo[1,5-a]pyridine (3ab)

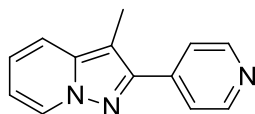

(Eluent: 5% EtOAc/hexane); 51% yield (22 mg); White solid; M.p.79-84°C;  $^1\text{H}$  NMR (500 MHz,  $\text{CDCl}_3$ )  $\delta$  8.70 (d,  $J = 4.5$  Hz, 2H), 8.42(d,  $J = 7.0$  Hz, 1H), 7.75-7.39(m, 2H), 7.47 (d,  $J = 9.0$  Hz, 1H), 7.09 (t,  $J = 9.0$  Hz, 1H), 6.75 (t,  $J = 7.0$  Hz, 1H), 2.47 (s, 3H),  $^{13}\text{C}$  NMR (125 MHz,  $\text{CDCl}_3$ )  $\delta$  148.7, 147.2, 140.3, 138.9, 126.9, 121.2, 121.1, 115.7, 111.1, 7.6. HRMS calcd for  $\text{C}_{13}\text{H}_{12}\text{N}_3$  : 210.1031. Found: 21046.

### 2-(Furan-2-yl)-3-methylpyrazolo[1,5-a]pyridine (3ac)

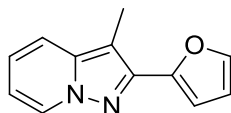

(Eluent: 5% EtOAc/hexane); 83% yield (32.9 mg); Liquid;  $^1\text{H}$  NMR (500 MHz,  $\text{CDCl}_3$ )  $\delta$  8.40 (d,  $J = 7.0$  Hz, 1H), 7.55(s,1H), 7.40(d,  $J = 8.5$  Hz, 1H), 7.04(d,  $J = 8.5$  Hz,1H), 7.04-

7.01(m, 1H), 6.78 (d,  $J = 3.5$  Hz, 1H), 6.67 (t,  $J = 7.0$  Hz, 1H), 6.53-6.52 (m, 1H), 2.44 (s, 3H),  $^{13}\text{C}$  NMR (125 MHz,  $\text{CDCl}_3$ )  $\delta$  148.8, 143.2, 142.3, 139.6, 1282, 122.2, 116.5, 111.6, 111.2, 1.8.1, 102.8, 8.4. HRMS calcd for  $\text{C}_{12}\text{H}_{11}\text{N}_2\text{O}$  : 210.1031. Found: 21046.

### 3-Methyl-2-(5-methylfuran-2-yl)pyrazolo[1,5-a]pyridine (3ad)

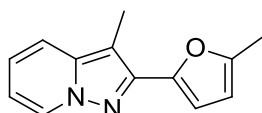

(Eluent: 5% EtOAc/hexane); 61% yield (25.9 mg); White solid; M.p.58-63°C;  $^1\text{H}$  NMR (500 MHz,  $\text{CDCl}_3$ )  $\delta$  8.42 (d,  $J = 7.0$  Hz, 1H), 7.38(d,  $J = 9.0$  Hz, 1H), 7.02 (t,  $J = 6.5$  Hz, 1H), 6.66-6.63(m, 2H), 6.11(d,  $J = 3.0$  Hz, 1H), 2.41(S, 3h), 2.40 (s, 3H),  $^{13}\text{C}$  NMR (125 MHz,  $\text{CDCl}_3$ )  $\delta$  152.4, 146.9, 143.5, 139.6, 128.2, 122.2, 116.3, 111.3, 109.4, 107.3, 102.3, 13.7, 8.5. HRMS calcd for  $\text{C}_{13}\text{H}_{13}\text{N}_2\text{O}$  : 213.1028. Found: 213.1022.

### 3-Methyl-2-(thiophen-2-yl)pyrazolo[1,5-a]pyridine (3ae)

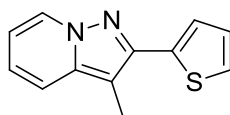

(Eluent: 5% EtOAc/hexane); 52% yield (22.2 mg); White solid; M.p.68-73°C;  $^1\text{H}$  NMR (500 MHz,  $\text{CDCl}_3$ )  $\delta$  8.39 (d,  $J = 7.0$  Hz, 1H), 7.48(d,  $J = 3.5$  Hz, 1H), 7.40-7.35(m, 2H), 7.15-7.13(M, 1h), 7.03 (T,  $J = 7.0$  Hz, 1H), 6,67 (t,  $J = 7.0$  Hz, 1H), 2.46 (s, 3H),  $^{13}\text{C}$  NMR (125 MHz,  $\text{CDCl}_3$ )  $\delta$  146.3, 140.0, 136.3, 128.0, 127.5, 125.4, 122.2, 116.5, 111.5, 102.8, 8.8. HRMS calcd for  $\text{C}_{12}\text{H}_{11}\text{N}_2\text{S}$  : 215.0643. Found: 215.0633.

### 3-Ethyl-2-phenylpyrazolo[1,5-a]pyridine (3af)

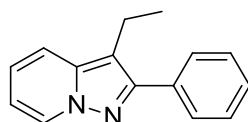

(Eluent: 5% EtOAc/hexane); 89% yield (39.4 mg); Liquid;  $^1\text{H}$  NMR (500 MHz,  $\text{CDCl}_3$ )  $\delta$  8.46 (d,  $J = 7.0$  Hz, 1H), 7.76(d,  $J = 7.0$  Hz, 2H), 7.49-7.46(m, 3H), 7.40 (t,  $J = 7.5$  Hz, 1H), 7.05 (t,  $J = 7.0$  Hz, 1H), 6.70 (d,  $J = 6.5$  Hz, 1H), 2.91(q  $J = 7.0$  Hz, 2H), 1.27 (t,  $J = 7.0$  Hz, 3H),  $^{13}\text{C}$  NMR (125 MHz,  $\text{CDCl}_3$ )  $\delta$  151.4, 139.4, 133.8, 128.4, 128.2, 127.8, 122.0, 116.7, 111.4, 110.1, 16.5, 15.5. HRMS calcd for  $\text{C}_{15}\text{H}_{15}\text{N}_2$  : 223.1235. Found: 223.1229.

### 3-Ethyl-2-(4-methoxyphenyl)pyrazolo[1,5-a]pyridine (3ag)

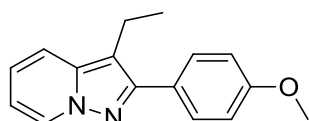

(Eluent: 5% EtOAc/hexane); 66% yield (33.2 mg); Liquid;  $^1\text{H}$  NMR (500 MHz,  $\text{CDCl}_3$ )  $\delta$  8.43 (d,  $J = 7.0$  Hz, 1H), 7.769(d,  $J = 9.0$  Hz, 2H), 7.56(d,  $J = 9.0$  Hz, 1H), 7.05-7.00(m, 3H), 6.68 (t,  $J = 7.0$  Hz, 1H), 3.86(s, 3H), 2.88(q  $J = 7.5$  Hz, 2H), 1.25 (t,  $J = 7.5$  Hz, 3H),  $^{13}\text{C}$  NMR (125 MHz,  $\text{CDCl}_3$ )  $\delta$  159.4, 151.2, 139.4, 129.6, 128.2, 126.3, 122.0, 116.6, 133.9, 111.2, 109.7, 51.2, 16.6, 15.4. HRMS calcd for  $\text{C}_{16}\text{H}_{17}\text{N}_2\text{O}$  : 253.1341. Found: 253.1358.

### 3-Ethyl-2-(4-(methylthio)phenyl)pyrazolo[1,5-a]pyridine (3ah)

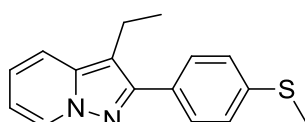

(Eluent: 5% EtOAc/hexane); 69% yield (37 mg); yellow solid; M.p.90-95°C;  $^1\text{H}$  NMR (500 MHz,  $\text{CDCl}_3$ )  $\delta$  8.43 (d,  $J = 6.5$  Hz, 1H), 7.47 (d,  $J = 8.5$  Hz, 1H), 7.36 (d,  $J = 8.0$  Hz, 2H), 7.06 (t,  $J = 8.0$  Hz, 1H), 6.71 (t,  $J = 6.5$  Hz, 1H), 2.89(q  $J = 7.5$  Hz, 2H), 2.53 (s, 3H), 1.27-1.24 (m, 3H),  $^{13}\text{C}$  NMR (125 MHz,  $\text{CDCl}_3$ )  $\delta$  150.8, 139.5, 12., 128.2, 126.4, 122.1, 116.7, 111.4, 110.0, 16.7, 15.7, 15.5. HRMS calcd for  $\text{C}_{16}\text{H}_{17}\text{N}_2\text{S}$  : 269.1112. Found: 269.1106.

### 3-Ethyl-2-(4-fluorophenyl)pyrazolo[1,5-a]pyridine (3ai)

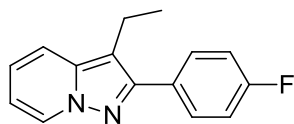

(Eluent: 5% EtOAc/hexane); 63% yield (30.1 mg); Liquid;  $^1\text{H}$  NMR (500 MHz,  $\text{CDCl}_3$ )  $\delta$  8.42 (d,  $J = 7.0$  Hz, 1H), 7.72-7.69 (m, 2H), 7.47(d,  $J = 9.0$  Hz, 2H), 7.15(t,  $J = 8.5$  Hz, 1H), 7.06 (t,  $J = 8.5$  Hz, 1H), 2.87(q,  $J = 7.5$  Hz, 2H), 1.25 (t,  $J = 7.5$  Hz, 3H),  $^{13}\text{C}$  NMR (125 MHz,  $\text{CDCl}_3$ )  $\delta$  163.6, 161.6, 150.5, 139.4, 130.17, 130.11, 130.0, 128.2, 122.2, 116.7, 115.5, 115.3, 111.5, 109.5, 16.6, 15.4. HRMS calcd for  $\text{C}_{15}\text{H}_{14}\text{N}_2\text{F}$  : 241.1141. Found: 241.1137

#### 4-(3-Ethylpyrazolo[1,5-a]pyridin-2-yl)benzofluorene (3aj)

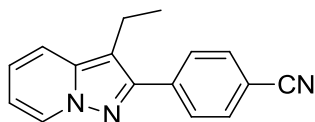

(Eluent: 5% EtOAc/hexane); 78% yield (38.5 mg); White solid; M.p.113-118°C;  $^1\text{H}$  NMR (500 MHz,  $\text{CDCl}_3$ )  $\delta$  8.43 (d,  $J = 7.0$  Hz, 1H), 7.89(d,  $J = 8.0$  Hz, 2H), 7.75(d,  $J = 8.5$  Hz, 2H), 7.51 (d,  $J = 9.0$  Hz, 1H), 7.10 (t,  $J = 6.5$  Hz, 1H), 6.77 (t,  $J = 6.5$  Hz, 1H), 2.91(q  $J = 7.5$  Hz, 2H), 1.27 (t,  $J = 7.5$  Hz, 3H),  $^{13}\text{C}$  NMR (125 MHz,  $\text{CDCl}_3$ )  $\delta$  149.0, 139.6, 138.6, 132.2, 128.7, 128.2, 122.5, 118.9, 117.0, 112.3, 111.2, 110.9, 16.6, 15.4. HRMS calcd for  $\text{C}_{16}\text{H}_{14}\text{N}_3$  : 248.1188. Found: 248.1176.

#### 3-Ethyl-2-(naphthalen-1-yl)pyrazolo[1,5-a]pyridine (3ak)

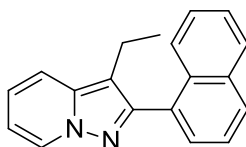

(Eluent: 5% EtOAc/hexane); 76% yield (41.1 mg); White solid; M.p.55-61°C;  $^1\text{H}$  NMR (500 MHz,  $\text{CDCl}_3$ )  $\delta$  8.52 (d,  $J = 7.0$  Hz, 1H), 7.96-7.87(m, 3H), 7.60-7.45(m, 5H), 7.12(t,  $J = 7.0$

Hz, 1H), 6.77(t,  $J = 7.0$  Hz, 1H), 2.69(q  $J = 7.5$  Hz, 2H), 1.09 (t,  $J = 7.5$  Hz, 3H),  $^{13}\text{C}$  NMR (125 MHz,  $\text{CDCl}_3$ )  $\delta$  151.3, 138.7, 133.5, 132.5, 131.3, 128.5, 128.4, 128.1, 128.0, 126.2, 126.1, 125.7, 125.0, 124.2, 124.1, 123.7, 123.0, 122.1, 166.8, 112.2, 111.3, 16.6, 15.4. HRMS calcd for  $\text{C}_{19}\text{H}_{17}\text{N}_2$  : 273.1392. Found: 273.1391.

### 3-Ethyl-2-(furan-2-yl)pyrazolo[1,5-a]pyridine (3al)

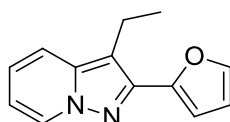

(Eluent: 5% EtOAc/hexane); 75% yield (31.9 mg); Liquid;  $^1\text{H}$  NMR (500 MHz,  $\text{CDCl}_3$ )  $\delta$  8.44 (d,  $J = 6.5$  Hz, 1H), 7.569s, 1H), 7.44 (d,  $J = 9.0$  Hz, 1H), 7.04(t,  $J = 9.0$  Hz, 1H), 6.81 (d,  $J = 8.0$  Hz, 1H), 6.70 (t,  $J = 8.5$  Hz, 1H), 6.53 (t,  $J = 6.5$  Hz, 1H), 2.95(q,  $J = 7.5$  Hz, 2H), 1.26 (t,  $J = 7.5$  Hz, 3H),  $^{13}\text{C}$  NMR (125 MHz,  $\text{CDCl}_3$ )  $\delta$  1148.6, 142.5, 142.3, 142.2, 139.2, 128.5, 128.2, 122.3, 116.5, 11.7, 111.2, 109.9, 108.0, 16.6, 15.1. HRMS calcd for  $\text{C}_{16}\text{H}_{17}\text{N}_2\text{O}$  : 253.1341. Found: 253.1358.

### 3-Ethyl-2-(thiophen-2-yl)pyrazolo[1,5-a]pyridine (3am)

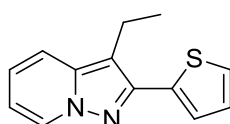

(Eluent: 5% EtOAc/hexane); 63% yield (28.8 mg); Liquid;  $^1\text{H}$  NMR (500 MHz,  $\text{CDCl}_3$ )  $\delta$  8.41 (d,  $J = 6.5$  Hz, 1H), 7.47(d,  $J = 3.5$  Hz, 1H), 7.43(d,  $J = 9.0$  Hz, 1H), 7.37 (d,  $J = 5.0$  Hz, 1H), 7.44 (t,  $J = 4.5$  Hz, 1H), 7.04 (t,  $J = 7.0$  Hz, 1H), 6.69 (t,  $J = 7.0$  Hz, 1H), 2.95(q  $J = 7.5$  Hz, 2H), 1.28 (t,  $J = 7.5$  Hz, 3H),  $^{13}\text{C}$  NMR (125 MHz,  $\text{CDCl}_3$ )  $\delta$  145.7, 139.6, 136.0, 128.1, 127.6, 125.6, 125.3, 124.4, 116.5, 111.6, 109.8, 16.8, 15.1. HRMS calcd for  $\text{C}_{13}\text{H}_{13}\text{N}_2\text{S}$  : 229.0797. Found: 229.0797.



### 1,3-Bis(3-methylpyrazolo[1,5-a]pyridin-2-yl)benzene (3an)

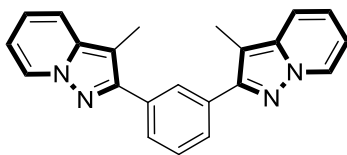

(Eluent: 5% EtOAc/hexane); 57% yield (38.2 mg); White solid; M.p.90-95°C;  $^1\text{H}$  NMR (500 MHz,  $\text{CDCl}_3$ )  $\delta$  8.45 (d,  $J = 6.5$  Hz, 2H), 8.20(s, 1H), 7.85(d,  $J = 7.0$  Hz, 2H), 7.59(t,  $J = 6.5$  Hz, 1H), 7.46 (d,  $J = 8.5$  Hz, 2H), 7.06 (t,  $J = 7.0$ Hz, 2H), 6.71(s, 2H), 2.50 (s, 6H),  $^{13}\text{C}$  NMR (125 MHz,  $\text{CDCl}_3$ )  $\delta$  151.6, 139.9, 132.0, 128.8, 128.5, 128.2, 127.9, 122.0, 116.7, 111.3, 103.2, 8.9. HRMS calcd for  $\text{C}_{22}\text{H}_{19}\text{N}_4$  : 339.1610. Found: 339.1623.

### Typical general procedure for the synthesis of 3-Nitro-2-phenylpyrazolo[1,5-a]pyridine (5a):

To a reaction tube without cap equipped with a magnetic stir bar was added 1-aminopyridinium iodide **1a** , (0.4 mmol), (Z)-(2-nitroprop-1-en-1-yl)benzene **2a** (0.2 mmol), and 1.0 mL of NMP. The mixture was at 60 °C under an open air in 24h. Reaction was monitored by TLC, after completion of the reaction. Then the mixture was poured into 20 mL of Hypo solution. The product was extracted with EtOAc (15 mL X 3) and dried with anhydrous  $\text{Na}_2\text{SO}_4$ . Removal of the solvent under reduced pressure the left out residue was purified by column chromatography using silica gel (20% EtOAc/hexane) to afford **5a**.

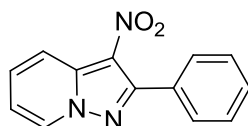

(20% EtOAc/hexane) 84% yield (40 mg); solid ;  $^1\text{H}$  NMR (500 MHz,  $\text{CDCl}_3$ )  $\delta$  8.58 (d,  $J = 7.0$  Hz, 1H), 8.46(d,  $J = 8.5$  Hz, 1H), 7.82-7.80(m, 2H), 7.69 (t,  $J = 7.0$  Hz, 1H), 7.51-7.50 (m, 3H), 7.17 (t,  $J = 7.0$  Hz, 1H),  $^{13}\text{C}$  NMR (125 MHz,  $\text{CDCl}_3$ )  $\delta$  152.2, 138.2, 130.8, 130.0,

129.9, 129.8, 129.4, 128.2, 119.3, 115.9. HRMS calcd for C<sub>13</sub>H<sub>10</sub>N<sub>3</sub>O<sub>2</sub> : 240.0773. Found: 240.0771

### 2-(4-(Tert-butyl)phenyl)-3-nitropyrrazolo[1,5-a]pyridine (5b)

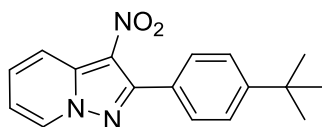

(20% EtOAc/hexane) 63% yield (37 mg); solid ; <sup>1</sup>H NMR (500 MHz, CDCl<sub>3</sub>) δ 8.56 (d, *J* = 7.0 Hz, 1H), 8.43(d, *J* = 9.0 Hz, 1H), 7.77 (d, *J* = 8.5 Hz, 2H), 7.66 (t, *J* = 7.5 Hz, 2H), (20% EtOAc/hexane) 7.53(d, *J* = 8.5 Hz, 2H), 7.14 (t, *J* = 7.0 Hz, 1H), 1.37 (s, 9H), <sup>13</sup>C NMR (125 MHz, CDCl<sub>3</sub>) δ 153.1, 152.1, 138.2, 130.7, 129.5, 129.3, 127.0, 125.1, 119.1, 115.8, 34.8, 13.1. HRMS calcd for C<sub>17</sub>H<sub>18</sub>N<sub>3</sub>O<sub>2</sub> : 296.1399. Found: 296.1395

### 2-(3,4-Dimethylphenyl)-3-nitropyrrazolo[1,5-a]pyridine (5c)

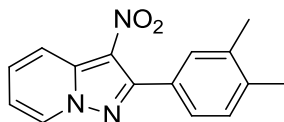

(20% EtOAc/hexane) 62% yield (33 mg); solid; <sup>1</sup>H NMR (500 MHz, CDCl<sub>3</sub>) δ 8.48 (d, *J* = 7.0 Hz, 1H), 8.35(d, *J* = 9.0 Hz, 1H), 7.58 (t, *J* = 8.5 Hz, 1H), 7.49-7.46 (m, 2H), 7.19 (d, *J* = 7.5 Hz, 1H), 7.06 (t, *J* = 7.0 Hz, 1H), 2.20 (s, 6H), <sup>13</sup>C NMR (125 MHz, CDCl<sub>3</sub>) δ 152.6, 139.0, 138.4, 136.7, 130.9, 129.7, 129.6, 127.6, 127.5, 119.4, 116.0, 20.0. HRMS calcd for C<sub>15</sub>H<sub>14</sub>N<sub>3</sub>O<sub>2</sub> : 268.1086. Found: 268.1082

### 2-(4-Methoxyphenyl)-3-nitropyrrazolo[1,5-a]pyridine (5d)

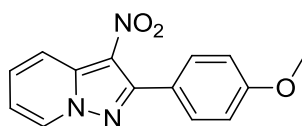

(20% EtOAc/hexane) 51% yield (27.4 mg); solid ;  $^1\text{H}$  NMR (500 MHz,  $\text{CDCl}_3$ )  $\delta$  8.55 (d,  $J = 6.5$  Hz, 1H), 8.42 (d,  $J = 9.0$  Hz, 1H), 7.81 (d,  $J = 8.5$  Hz, 2H), 7.66 (t,  $J = 7.5$  Hz, 1H), 7.14 (t,  $J = 7.0$  Hz, 1H), 7.03 (d,  $J = 8.5$  Hz, 2H), 3.88 (s, 3H),  $^{13}\text{C}$  NMR (125 MHz,  $\text{CDCl}_3$ )  $\delta$  160.9, 151.9, 138.3, 131.3, 130.6, 129.3, 122.1, 119.1, 115.8, 113.6, 55.3. HRMS calcd for  $\text{C}_{14}\text{H}_{12}\text{N}_3\text{O}_3$ : 270.0879. Found: 270.877

### 2-(4-(Methylthio)phenyl)-3-nitropyrrazolo[1,5-a]pyridine (5e)

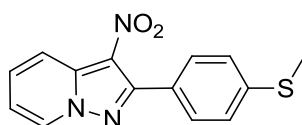

(20% EtOAc/hexane) 54% yield (31 mg); solid;  $^1\text{H}$  NMR (500 MHz,  $\text{CDCl}_3$ )  $\delta$  8.58 (d,  $J = 6.5$  Hz, 1H), 8.43 (d,  $J = 9.0$  Hz, 1H), 7.76 (d,  $J = 8.5$  Hz, 2H), 7.68 (t,  $J = 7.5$  Hz, 1H), 7.35 (d,  $J = 8.5$  Hz, 2H), 7.16 (t,  $J = 6.5$  Hz, 1H), 2.54 (s, 3H),  $^{13}\text{C}$  NMR (125 MHz,  $\text{CDCl}_3$ )  $\delta$  151.6, 141.4, 138.2, 130.8, 130.1, 129.3, 126.2, 125.4, 119.2, 115.9, 15.2. HRMS calcd for  $\text{C}_{14}\text{H}_{12}\text{N}_3\text{O}_2\text{S}$ : 286.0650. Found: 286.0554

### 2-(4-Chlorophenyl)-3-nitropyrrazolo[1,5-a]pyridine (5f)

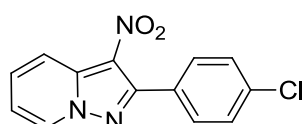

(20% EtOAc/hexane) 77% yield (42 mg); solid ;  $^1\text{H}$  NMR (500 MHz,  $\text{CDCl}_3$ )  $\delta$  8.57 (d,  $J = 6.5$  Hz, 1H), 8.45 (d,  $J = 9.0$  Hz, 1H), 7.77 (d,  $J = 8.5$  Hz, 2H), 7.70 (t,  $J = 7.5$  Hz, 1H), 7.48 (d,  $J = 8.5$  Hz, 2H), 7.19 (t,  $J = 7.5$  Hz, 1H),  $^{13}\text{C}$  NMR (125 MHz,  $\text{CDCl}_3$ )  $\delta$  150.0, 137.2, 135.1, 130.2, 130.0, 128.4, 128.3, 127.4, 126.3, 118.2, 115.1. HRMS calcd for  $\text{C}_{13}\text{H}_9\text{N}_3\text{O}_2\text{Cl}$ : 273.0383. Found: 273.0376

### 2-(4-Fluorophenyl)-3-nitropyrrazolo[1,5-a]pyridine (5g)

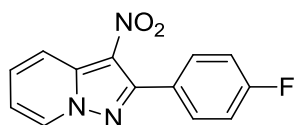

(20% EtOAc/hexane) 51% yield (26.5 mg); solid;  $^1\text{H}$  NMR (500 MHz,  $\text{CDCl}_3$ )  $\delta$  8.57 (d,  $J$  = 6.5 Hz, 1H), 8.45 (d,  $J$  = 9.0 Hz, 1H), 7.82 (d,  $J$  = 5.0 Hz, 2H), 7.70 (t,  $J$  = 7.5 Hz, 1H), 7.19 (d,  $J$  = 8.0 Hz, 3H),  $^{13}\text{C}$  NMR (125 MHz,  $\text{CDCl}_3$ )  $\delta$  164.8, 162.8, 151.2, 138.2, 132.0, 131.9, 130.9, 129.4, 126.0, 119.3, 116.0, 115.4, 115.2. HRMS calcd for  $\text{C}_{13}\text{H}_9\text{N}_3\text{O}_2\text{F}$  : 258.0679. Found: 258.0683

### 2-(Naphthalen-1-yl)-3-nitropyrazolo[1,5-a]pyridine (5h)

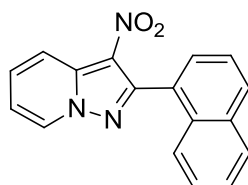

(20% EtOAc/hexane) 51% yield (29.4 mg); solid;  $^1\text{H}$  NMR (500 MHz,  $\text{CDCl}_3$ )  $\delta$  8.59 (d,  $J$  = 7.0 Hz, 1H), 8.47 (d,  $J$  = 9.0 Hz, 1H), 8.01 (d,  $J$  = 8.0 Hz, 1H), 7.93 (d,  $J$  = 8.5 Hz, 1H), 7.70-7.63 (m, 3H), 7.58 (t,  $J$  = 8.5 Hz, 1H), 7.50 (t,  $J$  = 7.5 Hz, 1H), 7.543 (t,  $J$  = 7.5 Hz, 1H), 7.16-7.13 (m, 1H).  $^{13}\text{C}$  NMR (125 MHz,  $\text{CDCl}_3$ )  $\delta$  151.3, 137.5, 133.2, 131.6, 130.9, 130.1, 129.5, 128.4, 128.1, 128.0, 126.7, 126.0, 124.9, 124.8, 123.7, 118.9. HRMS calcd for  $\text{C}_{17}\text{H}_{12}\text{N}_3\text{O}_2$  : 290.0930. Found: 290.0928

### 3-Nitro-2-(thiophen-2-yl)pyrazolo[1,5-a]pyridine (5i)

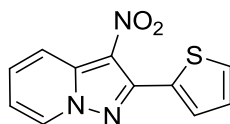

(20% EtOAc/hexane) 69% yield (34 mg); solid;  $^1\text{H}$  NMR (500 MHz,  $\text{CDCl}_3$ )  $\delta$  8.58 (d,  $J$  = 7.0 Hz, 1H), 8.44 (d,  $J$  = 9.0 Hz, 1H), 8.27 (d,  $J$  = 3.0 Hz, 1H), 7.66 (t,  $J$  = 8.0 Hz, 1H),

7.55(d,  $J = 5.0$  Hz, 1H), 7.21 (t,  $J = 4.0$  Hz, 1H), 7.17 (t,  $J = 7.0$  Hz, 1H),  $^{13}\text{C}$  NMR (125 MHz,  $\text{CDCl}_3$ )  $\delta$  145.7, 138.4, 131.9, 131.1, 130.7, 128.6, 129.1, 127.8, 119.2, 116.2. HRMS calcd for  $\text{C}_{11}\text{H}_8\text{N}_3\text{O}_2\text{S}$ : 246.0337. Found: 246.0334.

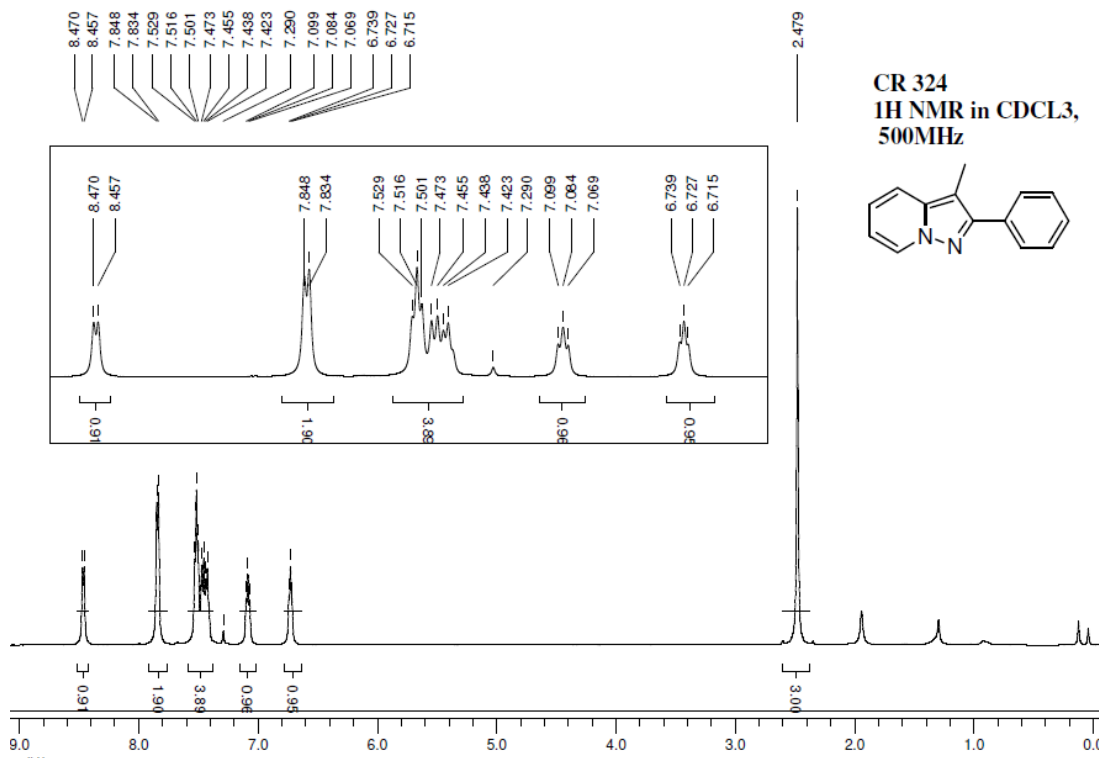

**<sup>1</sup>H NMR of 3a**

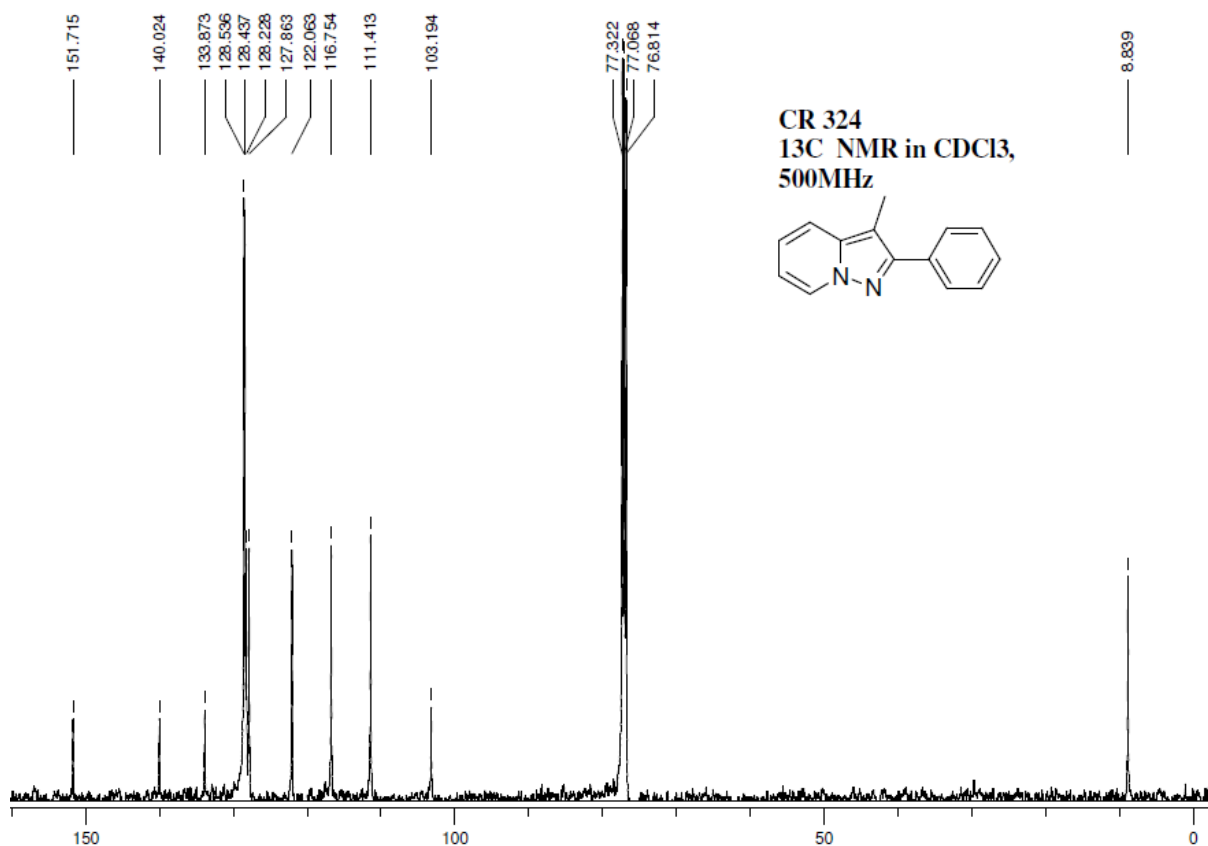

**<sup>13</sup>C NMR of 3a**

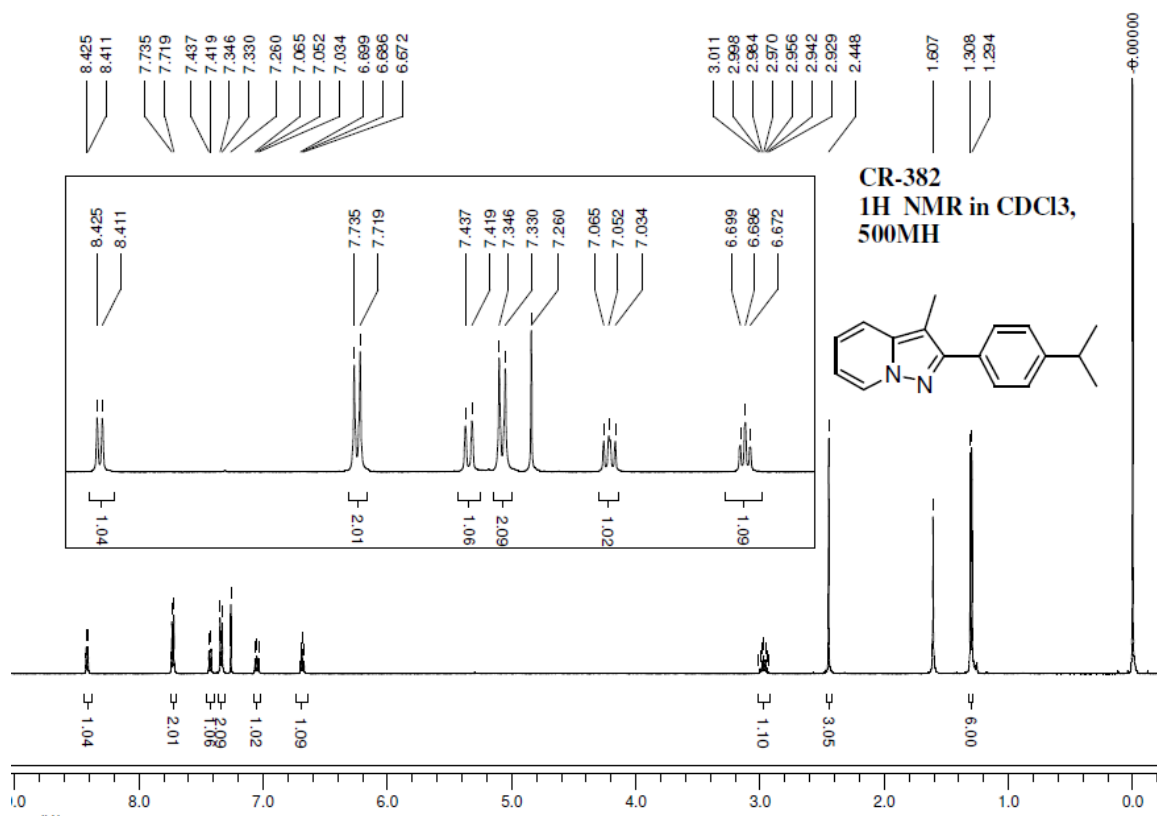

**<sup>1</sup>H NMR of 3b**

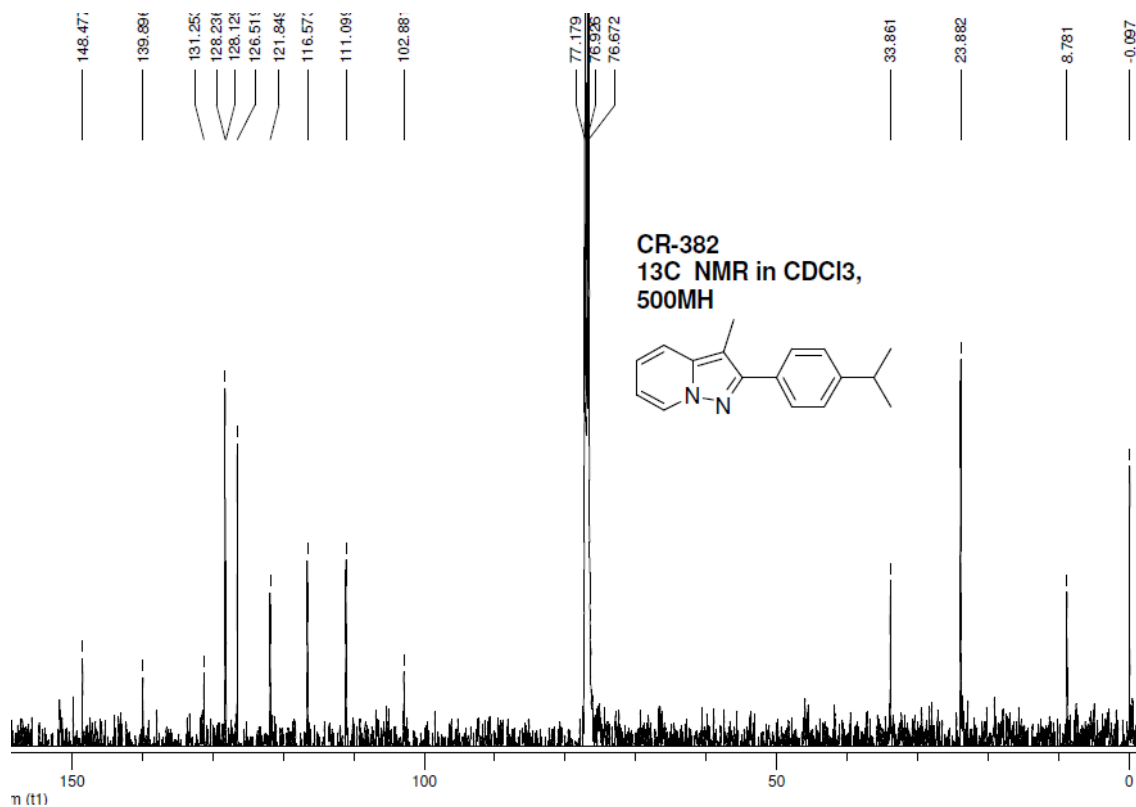

**<sup>13</sup>C NMR of 3b**

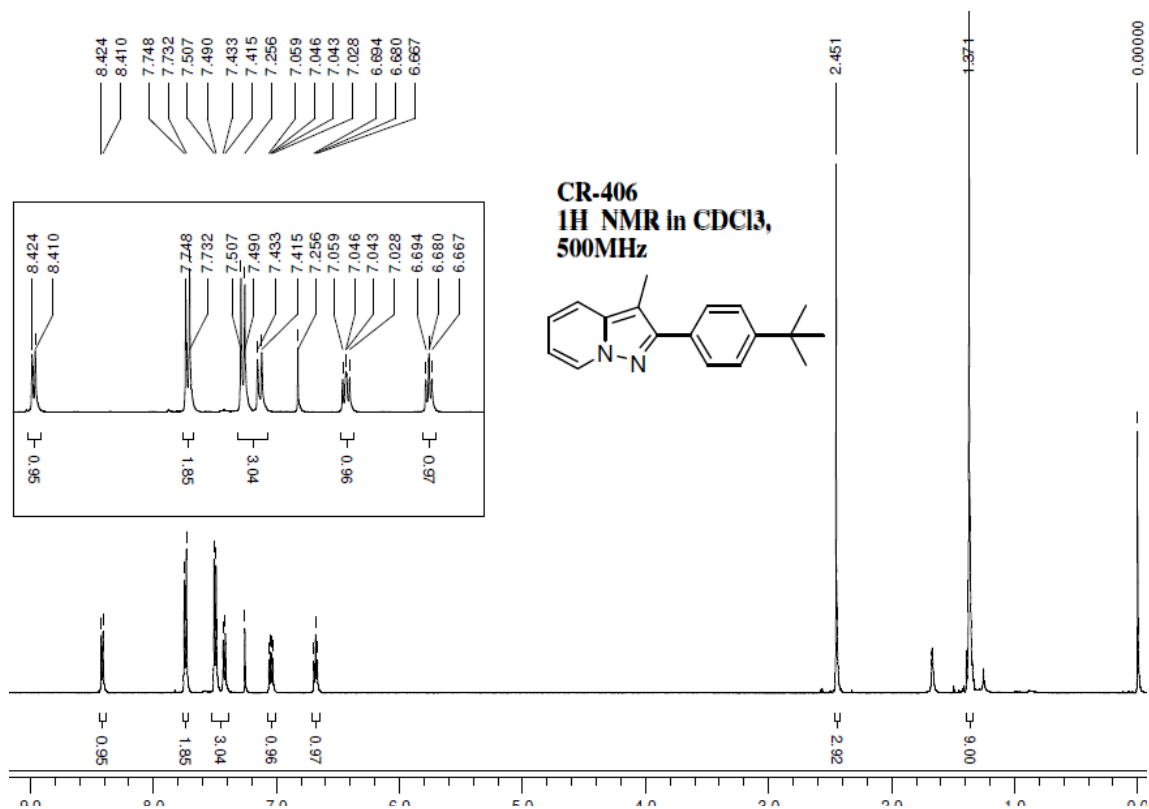

**<sup>1</sup>H NMR of 3c**

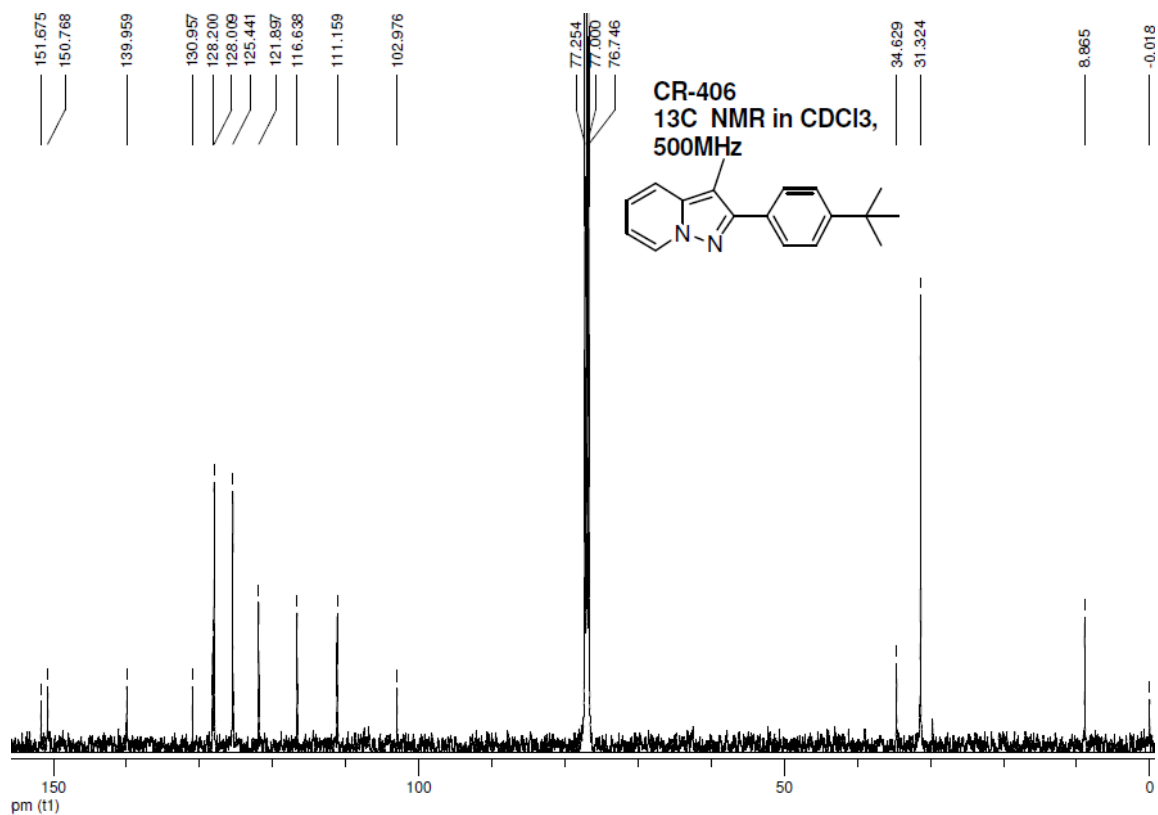

**<sup>13</sup>C NMR of 3c**



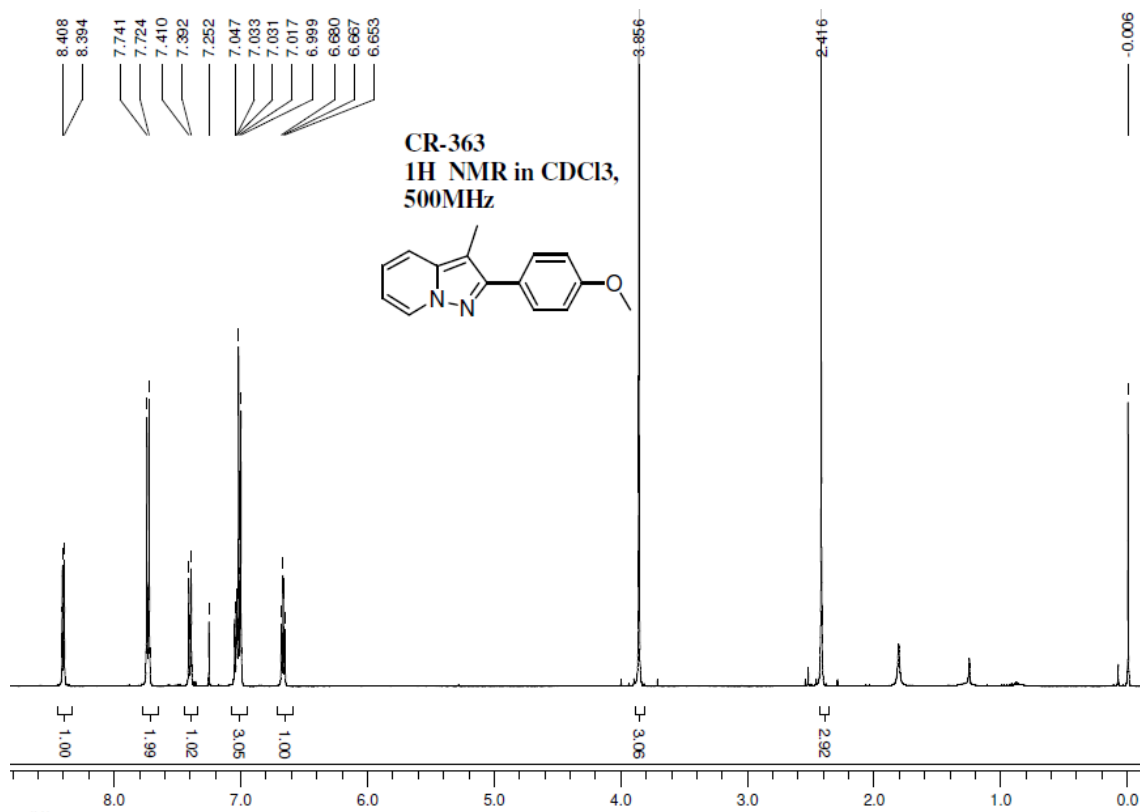

**<sup>1</sup>H NMR of 3d**

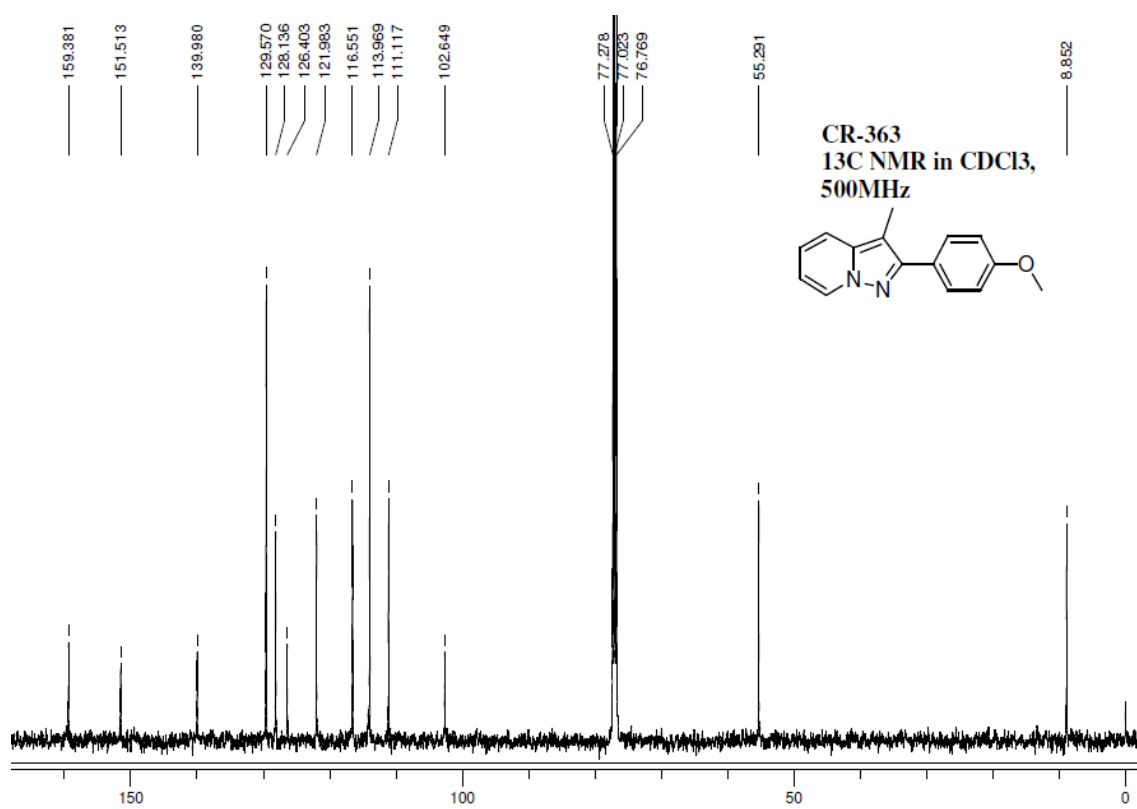

**<sup>13</sup>C NMR of 3d**

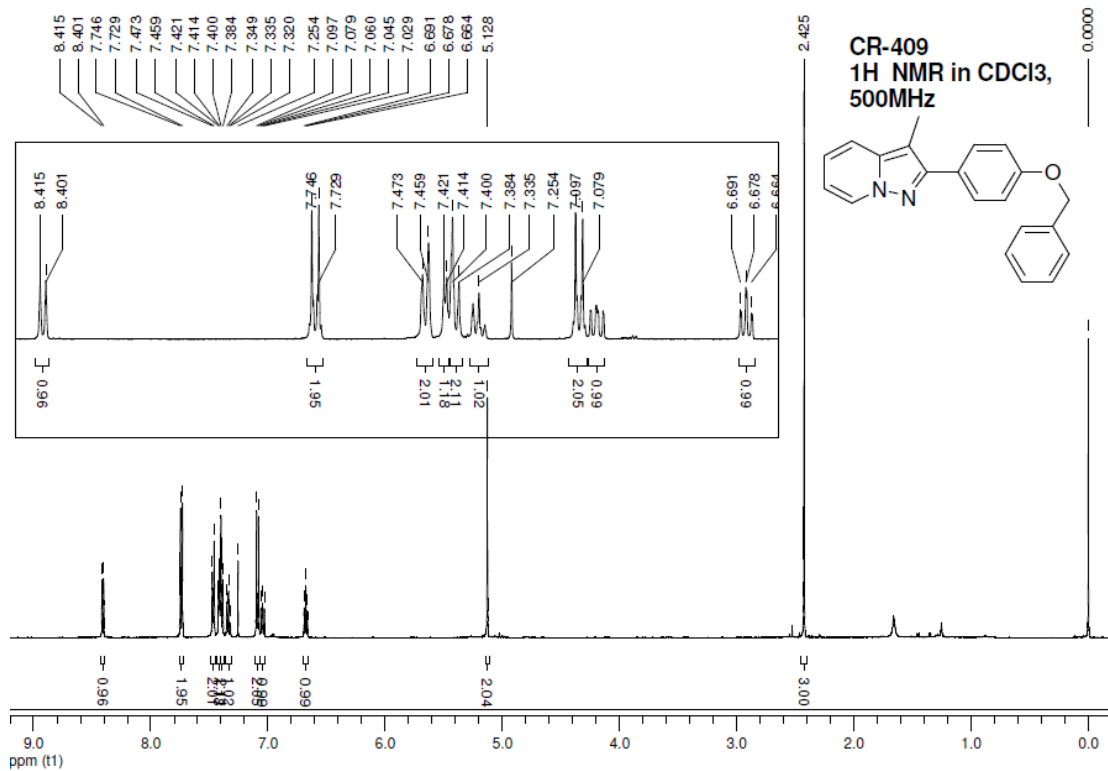

**<sup>1</sup>H NMR of 3e**

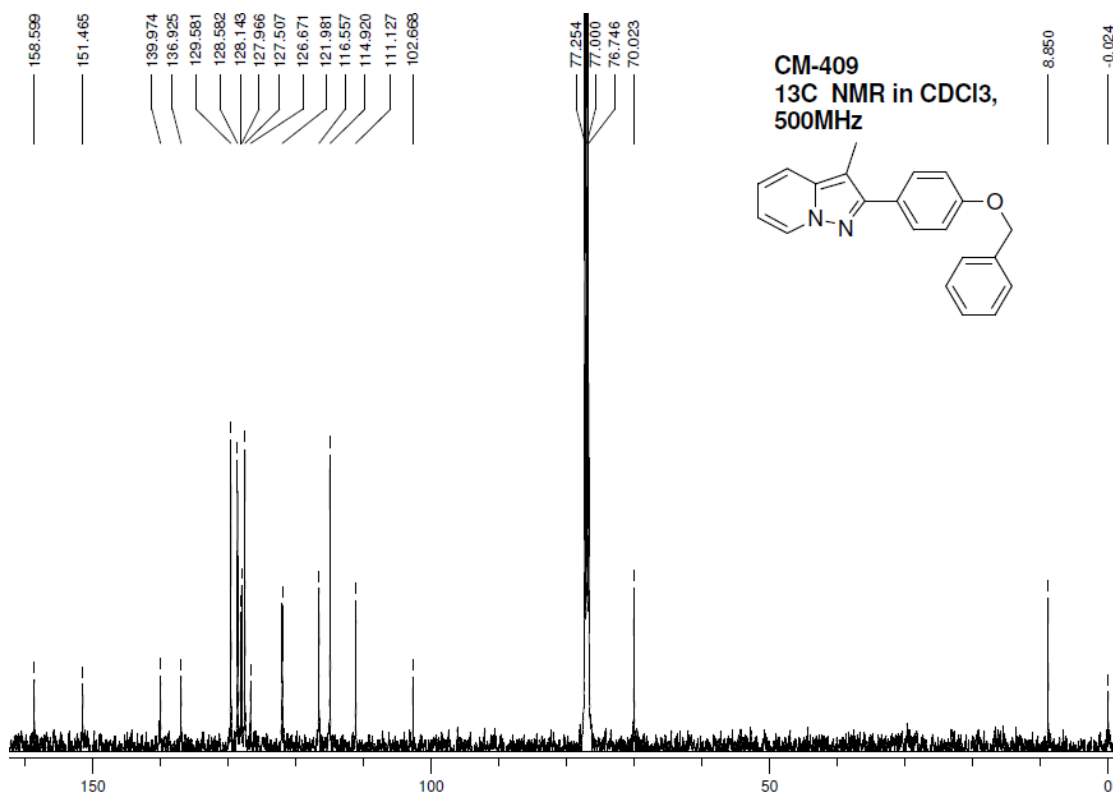

**<sup>13</sup>C NMR of 3e**

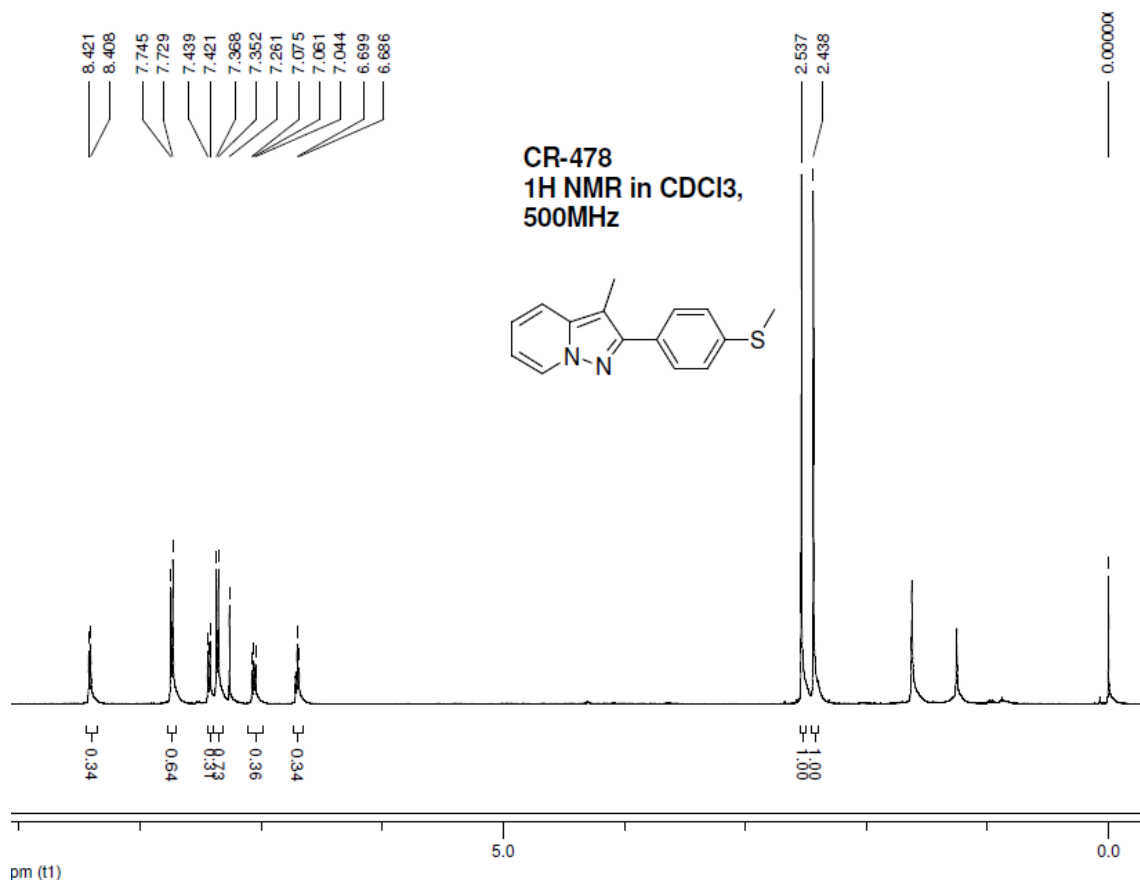

1H NMR of 3f

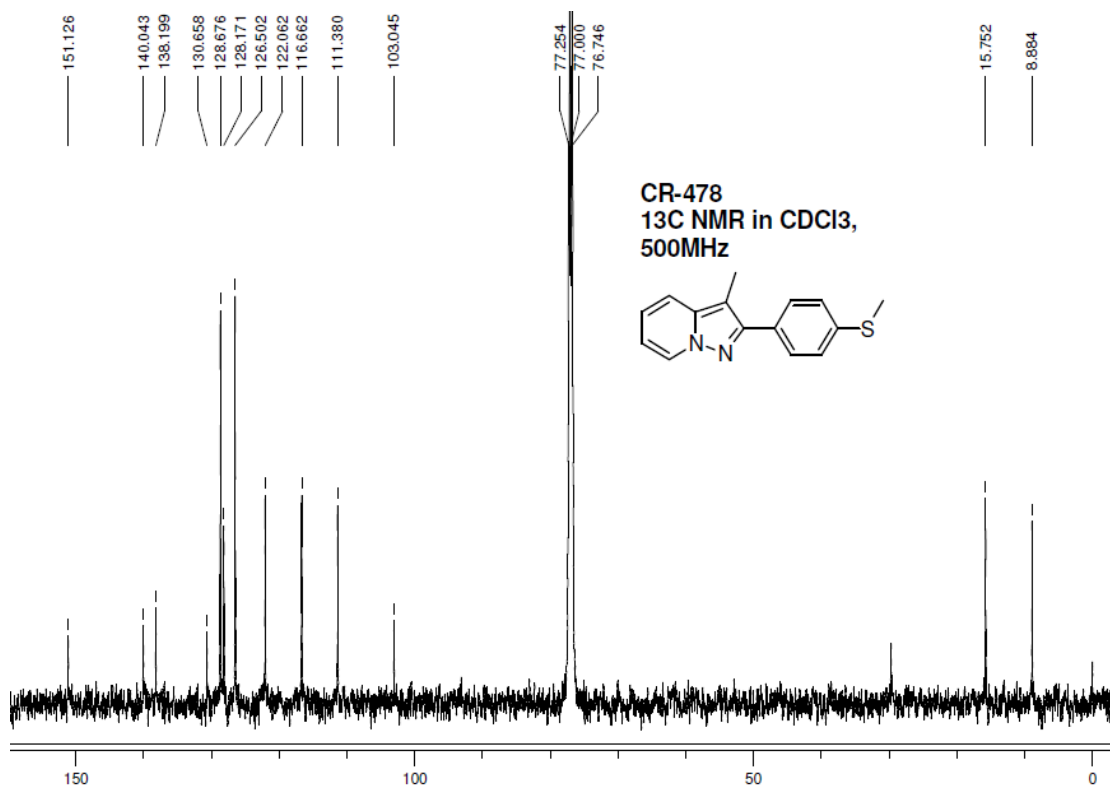

13C NMR of 3f

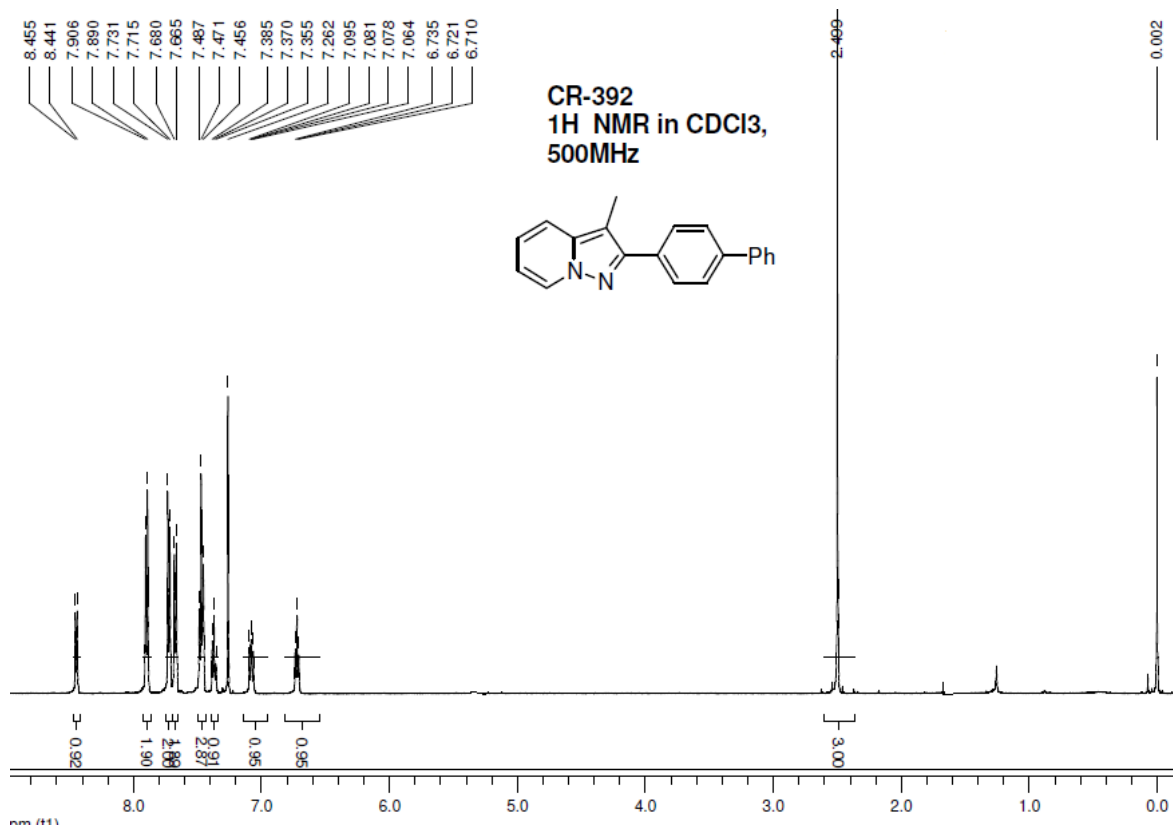

1H NMR of 3g

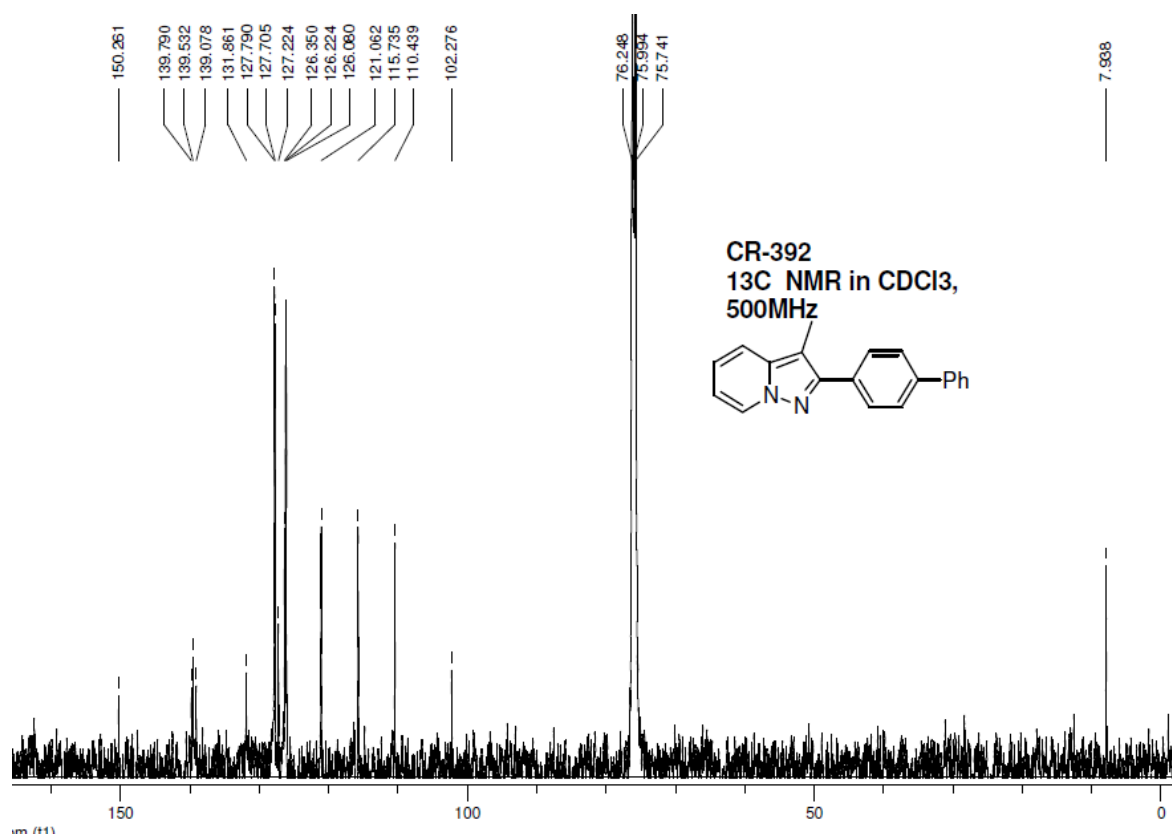

13C NMR of 3g

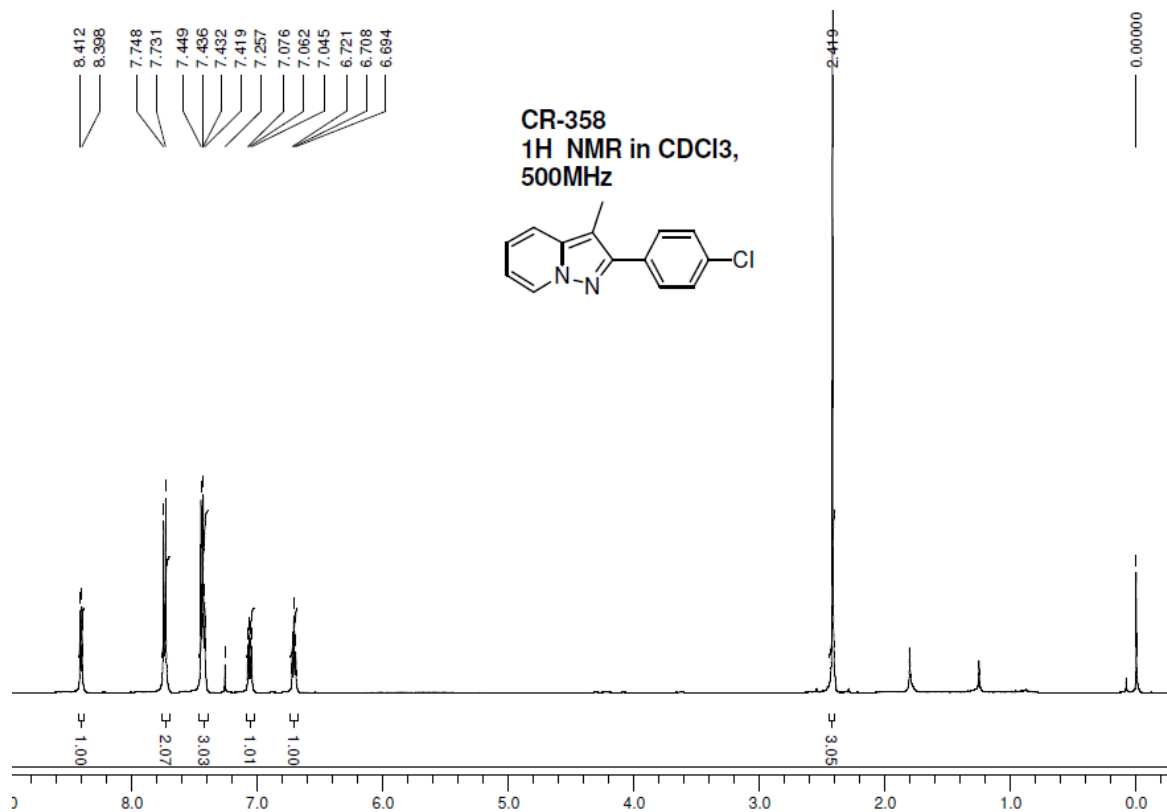

1H NMR of 3h

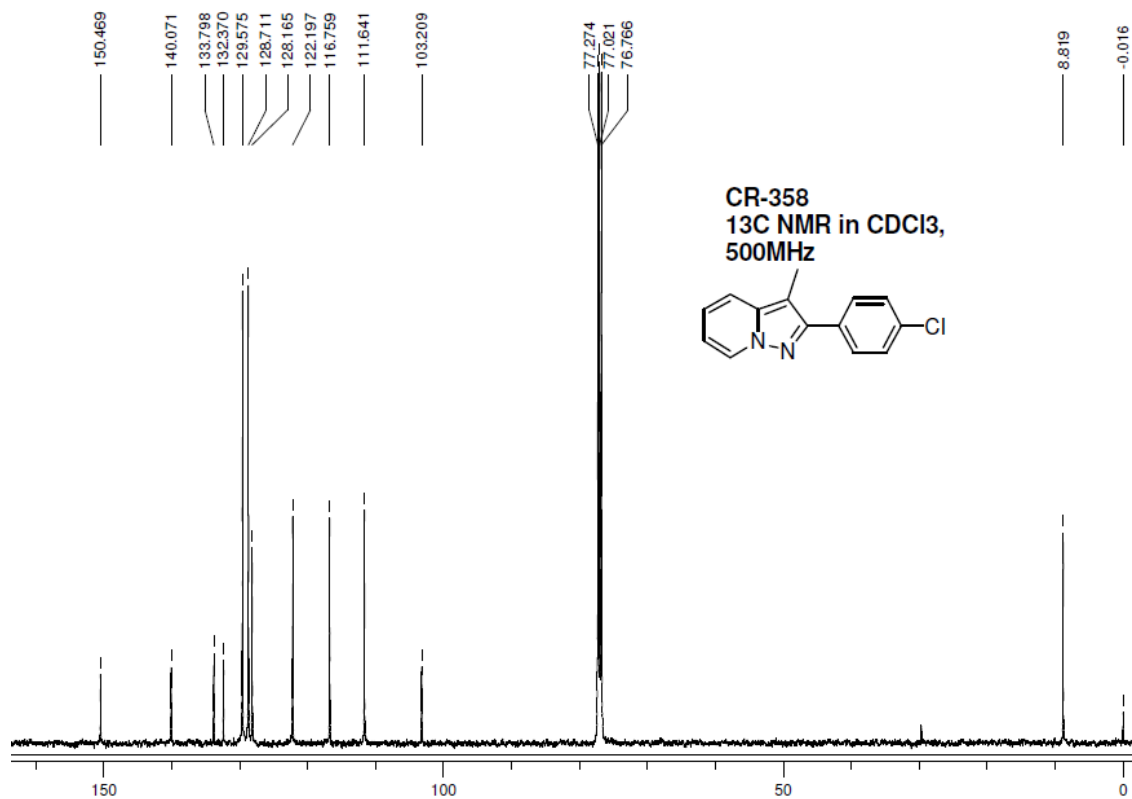

13C NMR of 3h

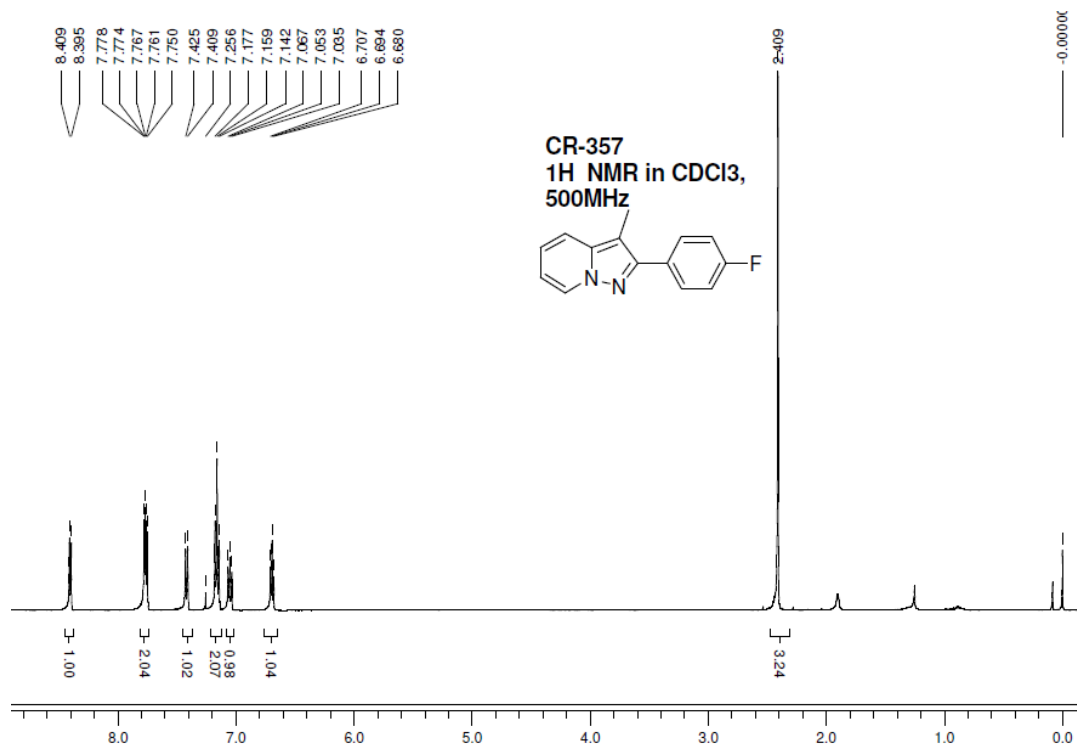

1H NMR of 3i

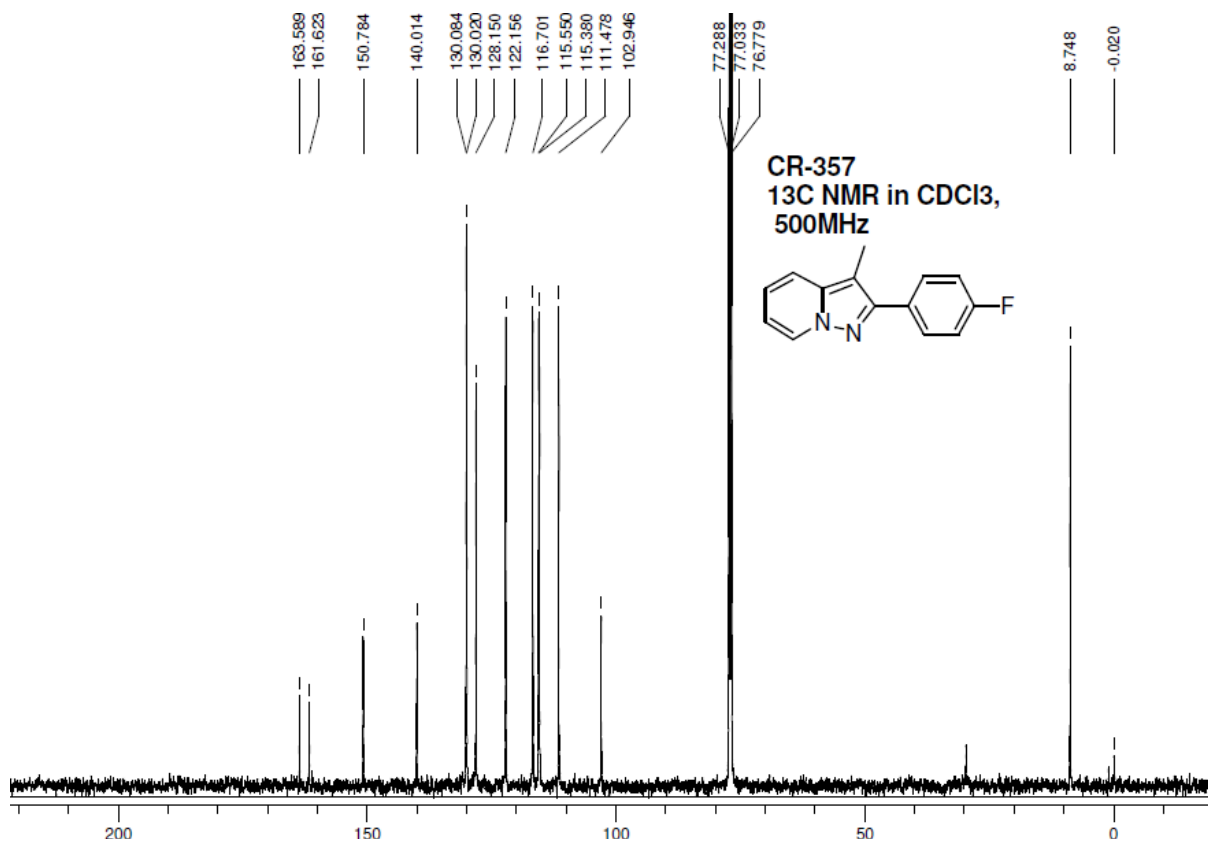

13C NMR of 3i

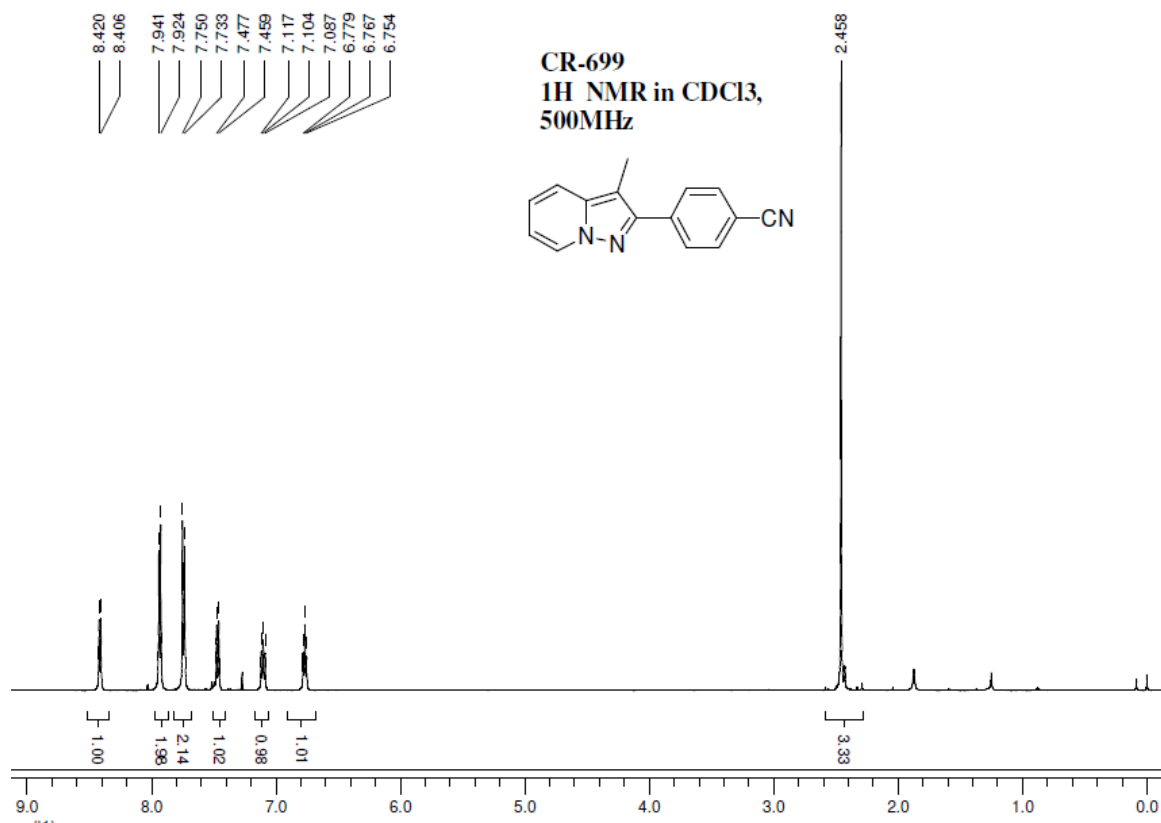

1H NMR of 3j

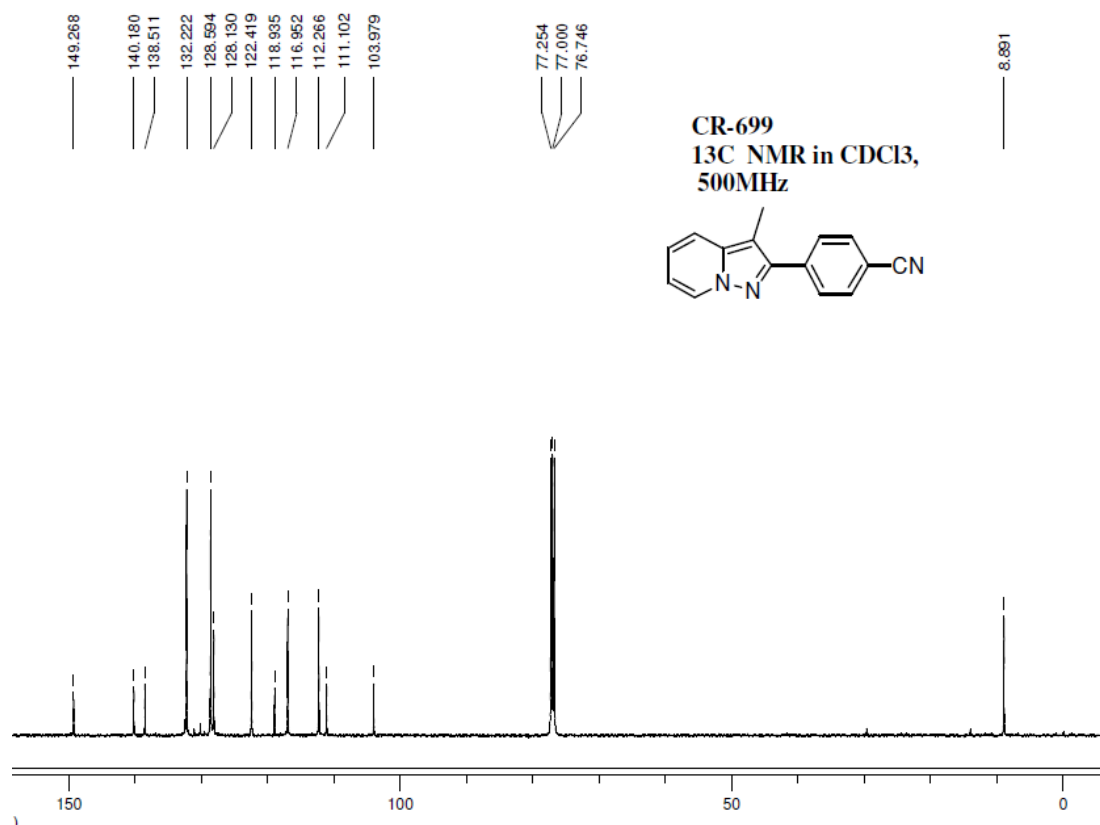

13C NMR of 3j

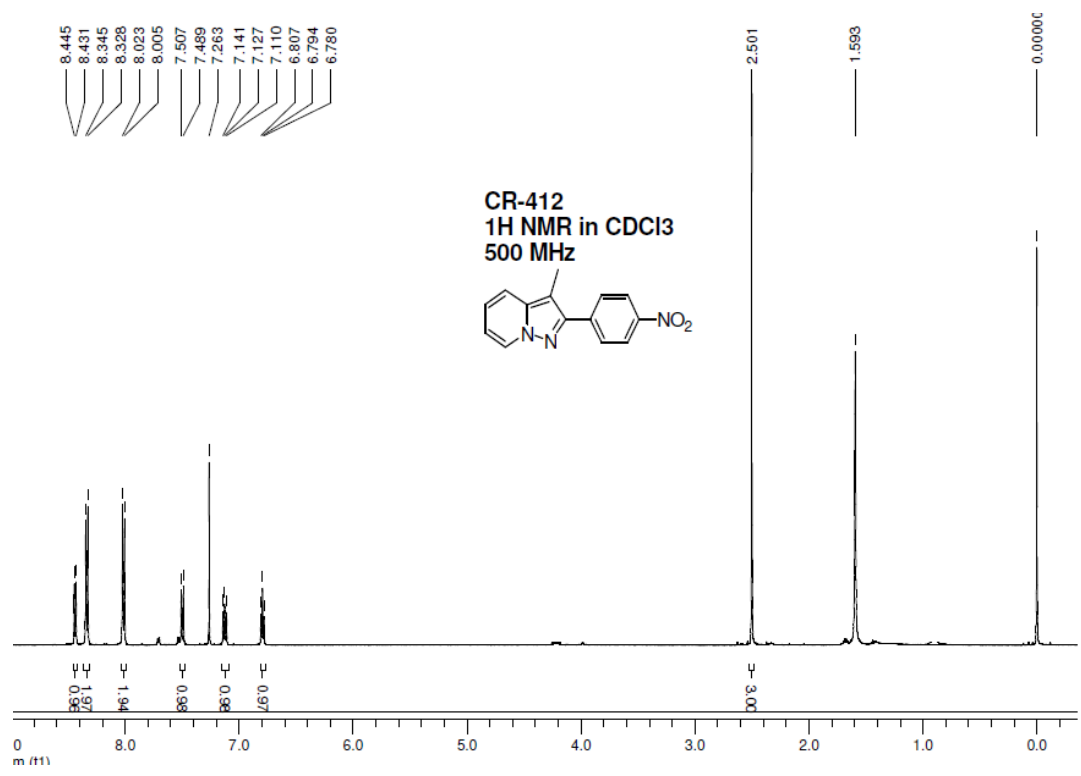

1H NMR of 3k

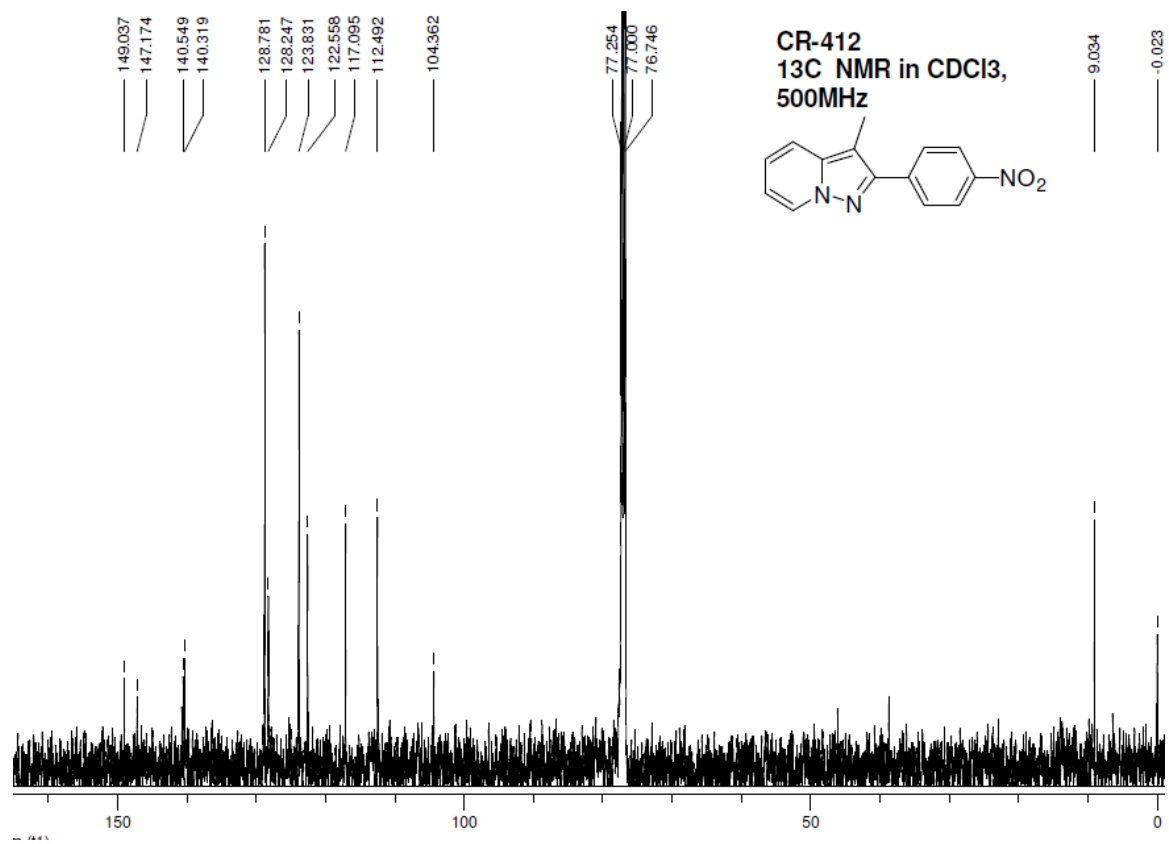

13C NMR of 3k



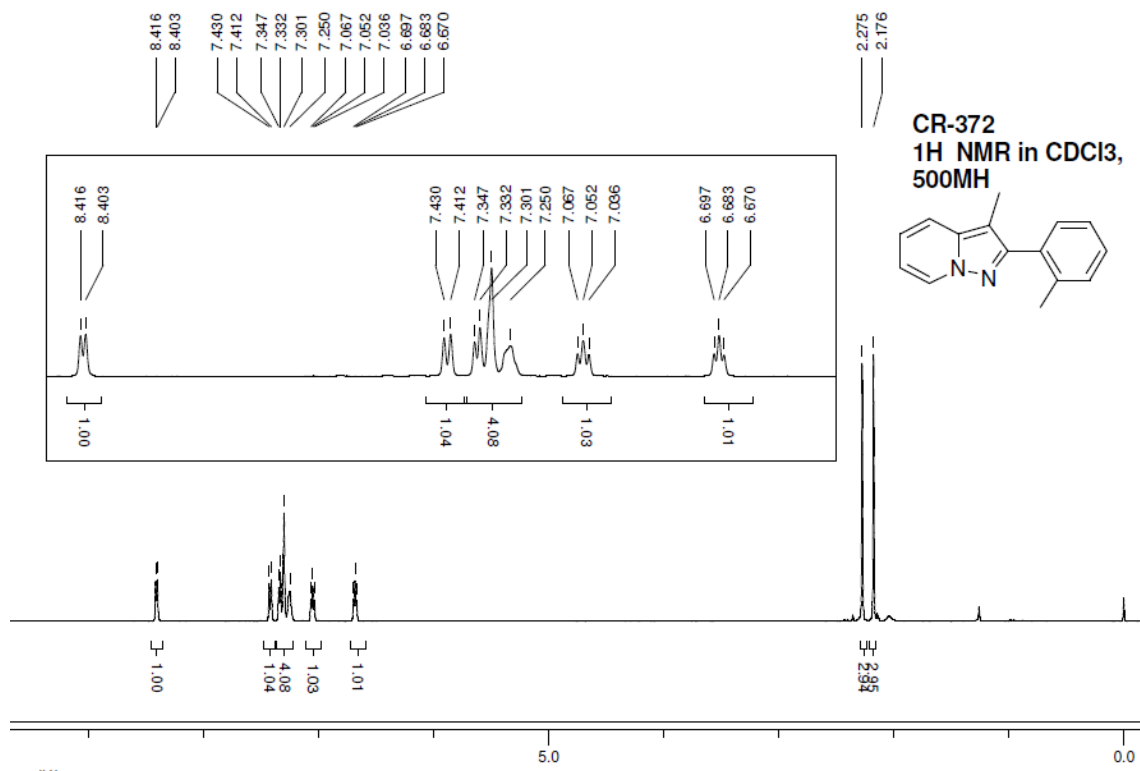

1H NMR of 3m

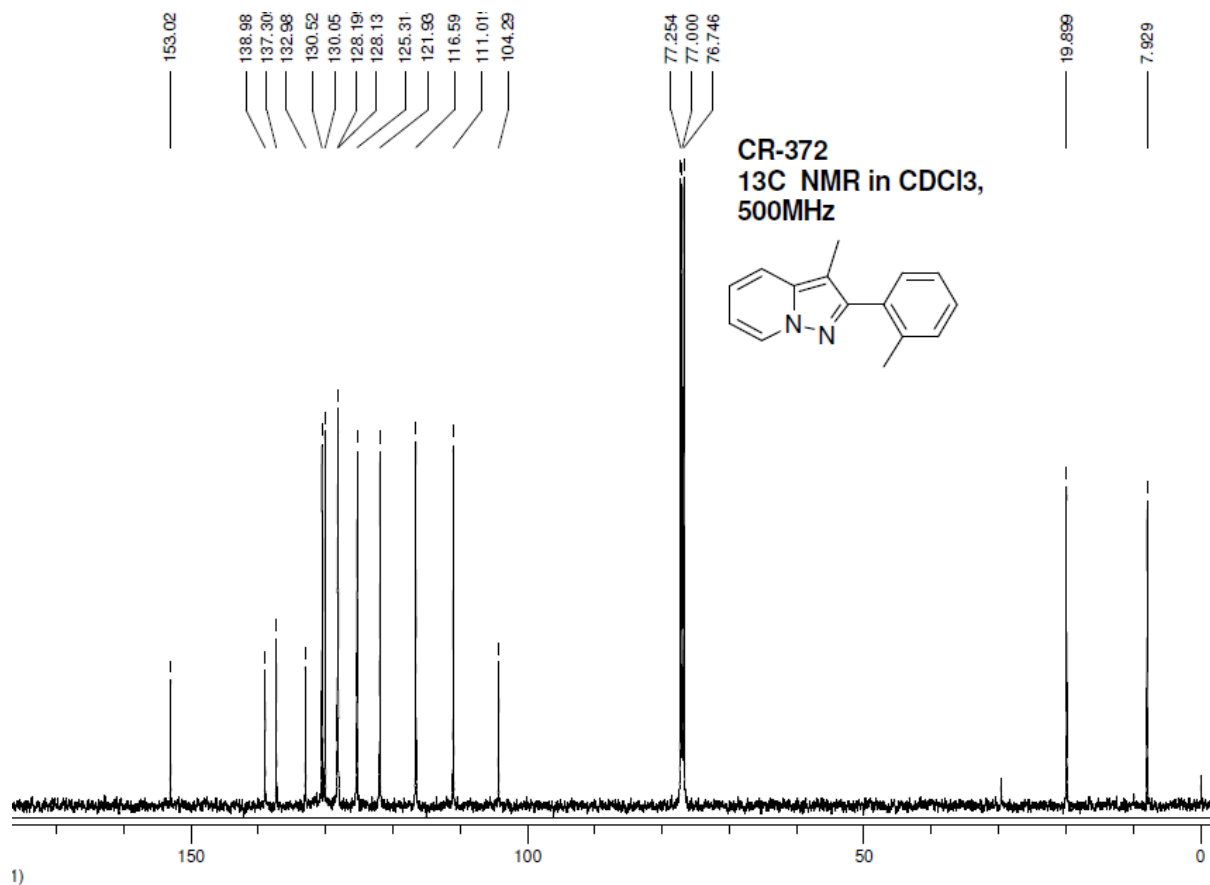

13C NMR of 3m

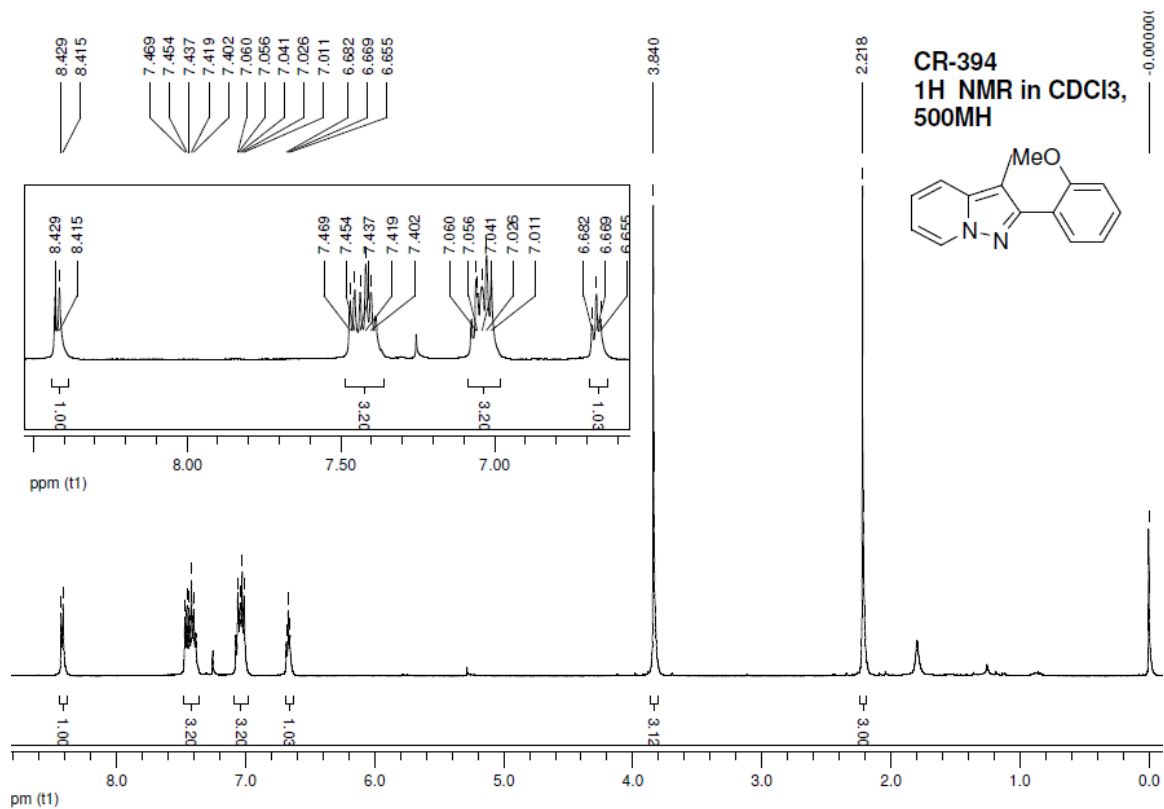

1H NMR of 3n

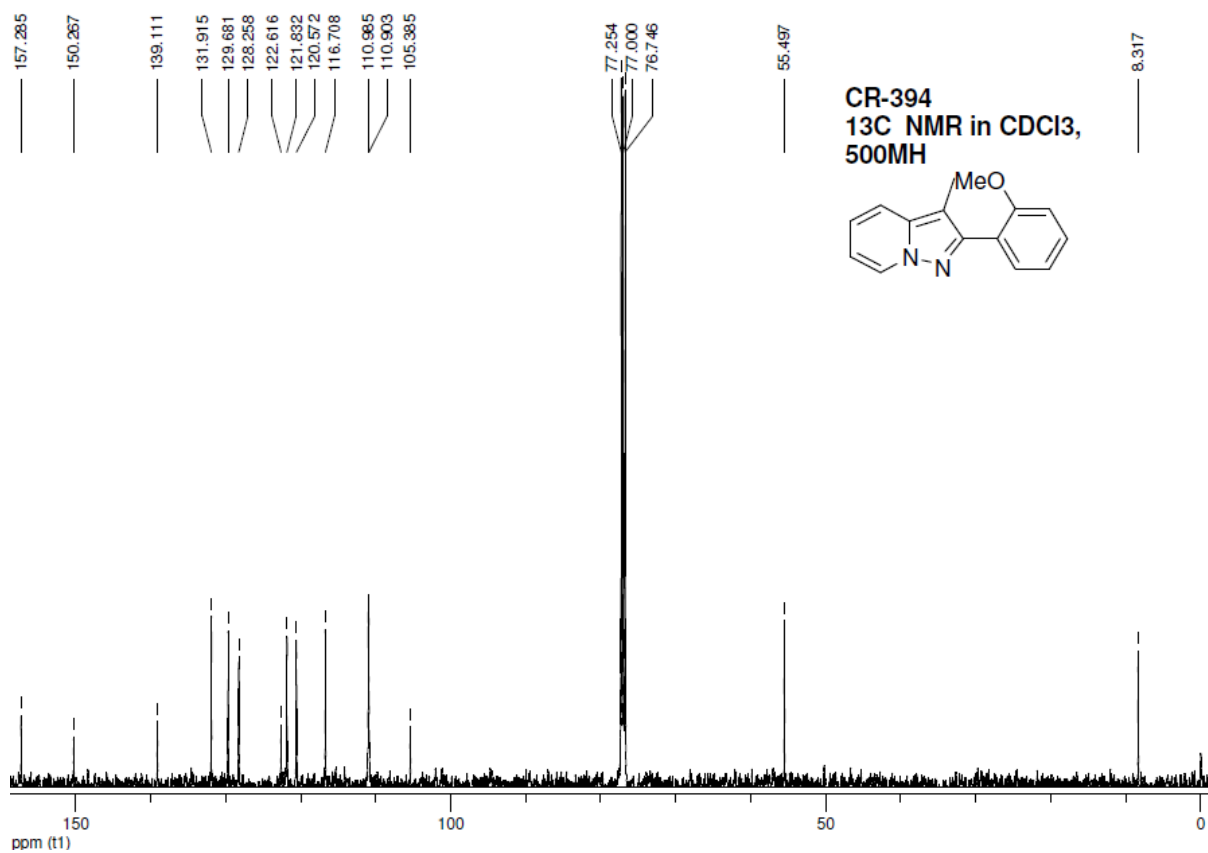

13C NMR of 3n



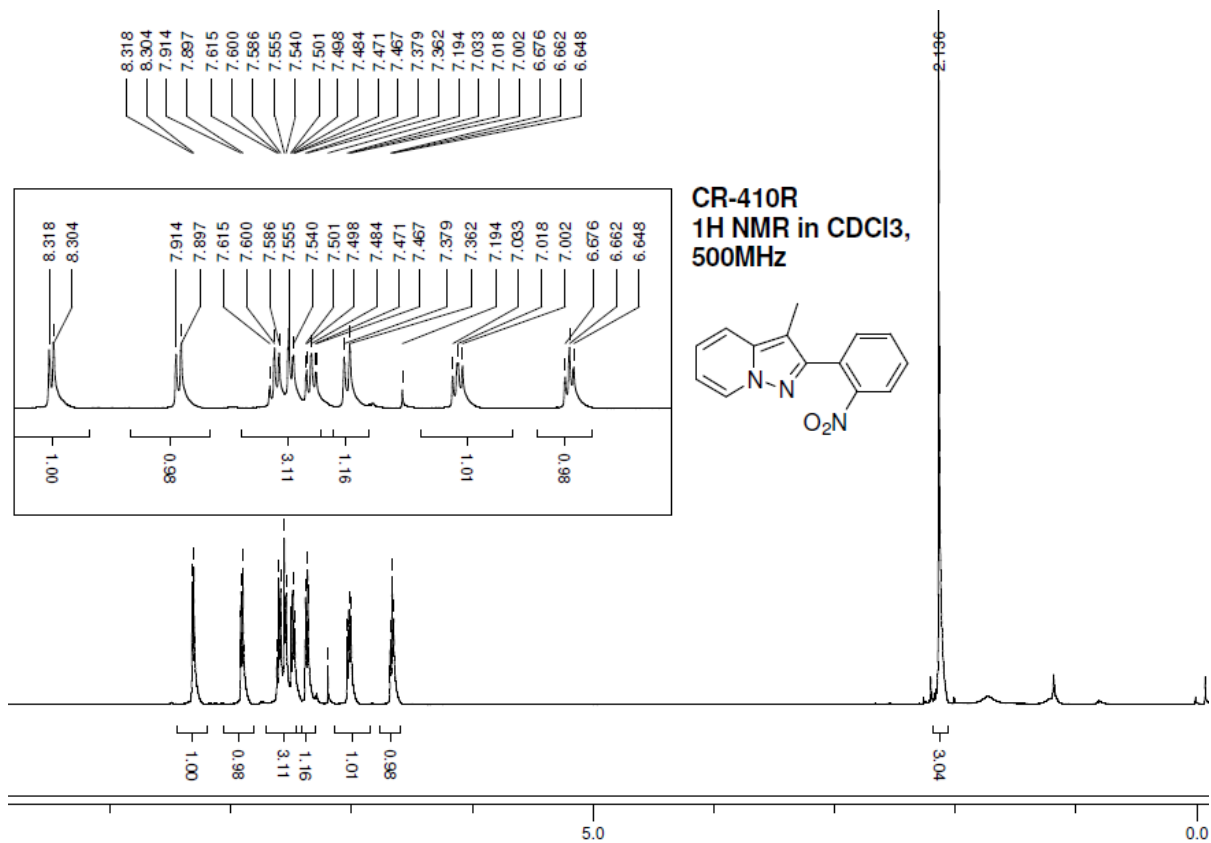

1H NMR of 3p

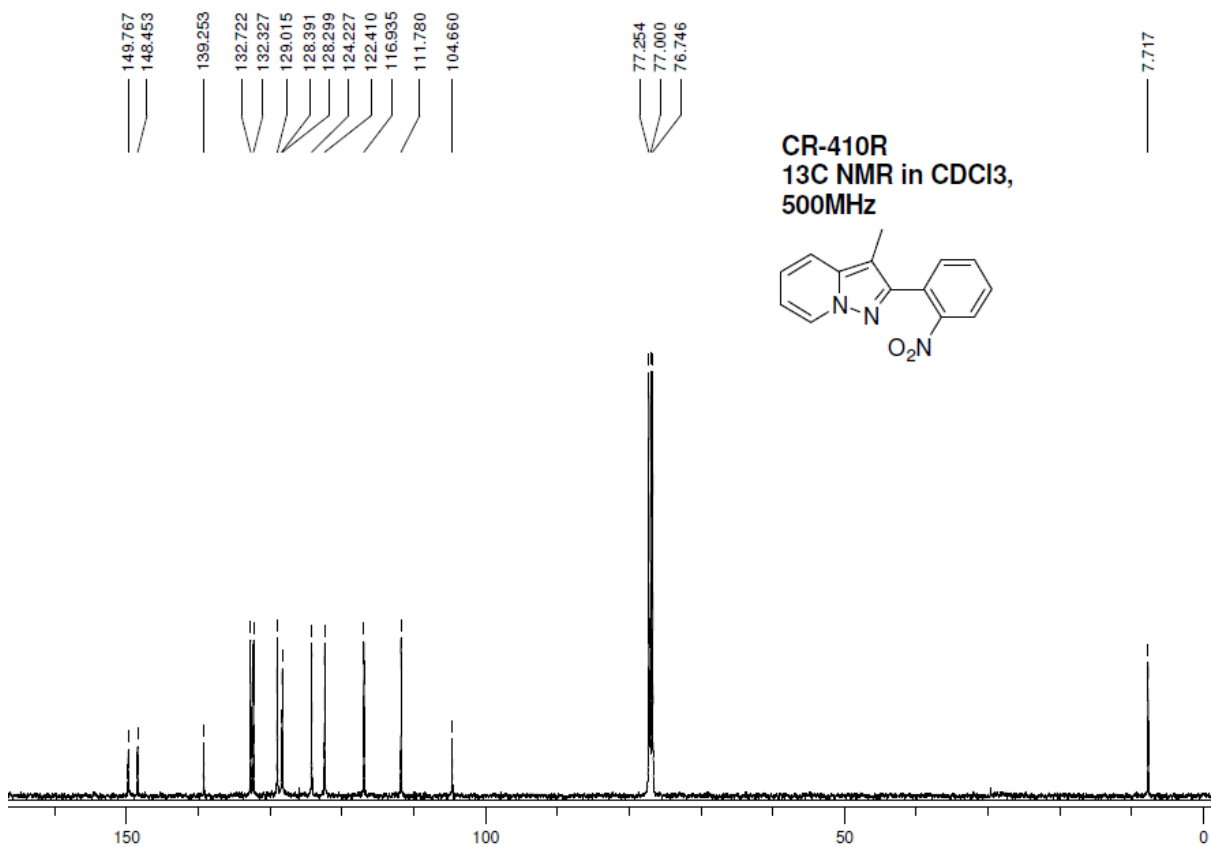

13C NMR of 3p

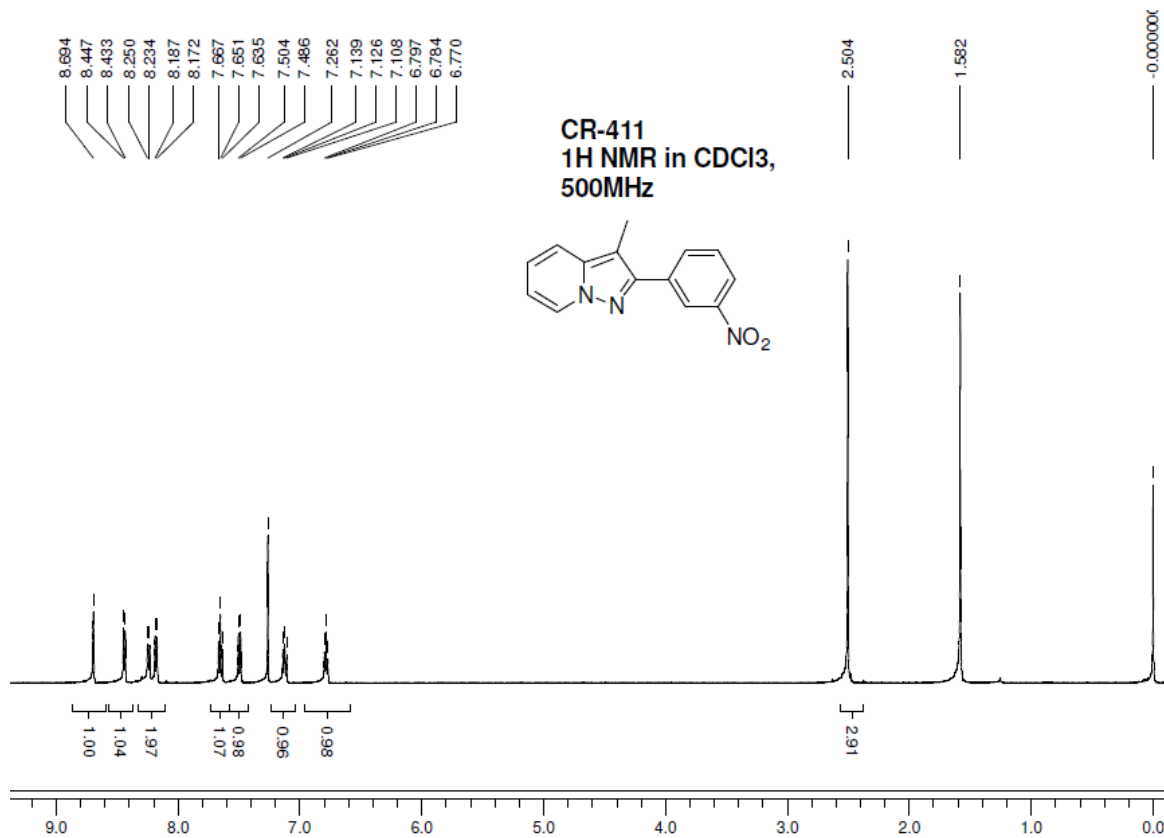

**<sup>1</sup>H NMR of 3q**

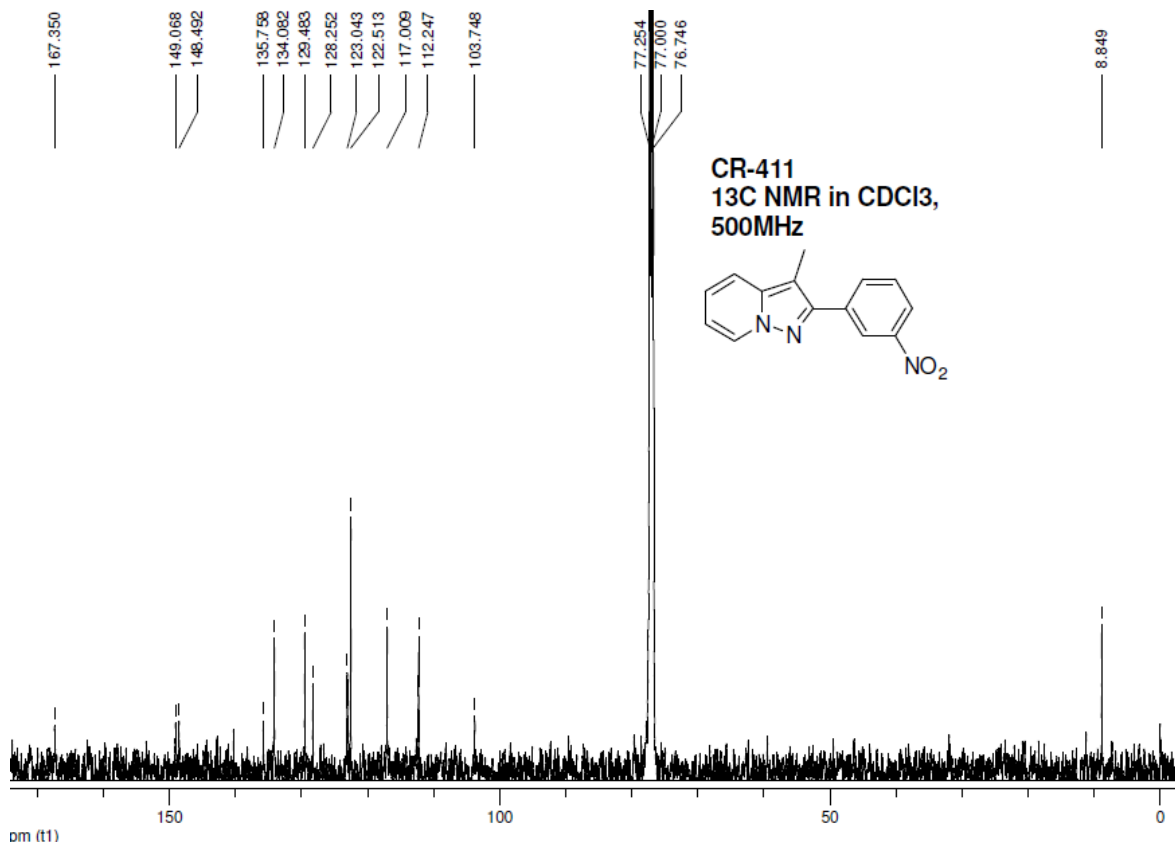

**<sup>13</sup>C NMR of 3q**

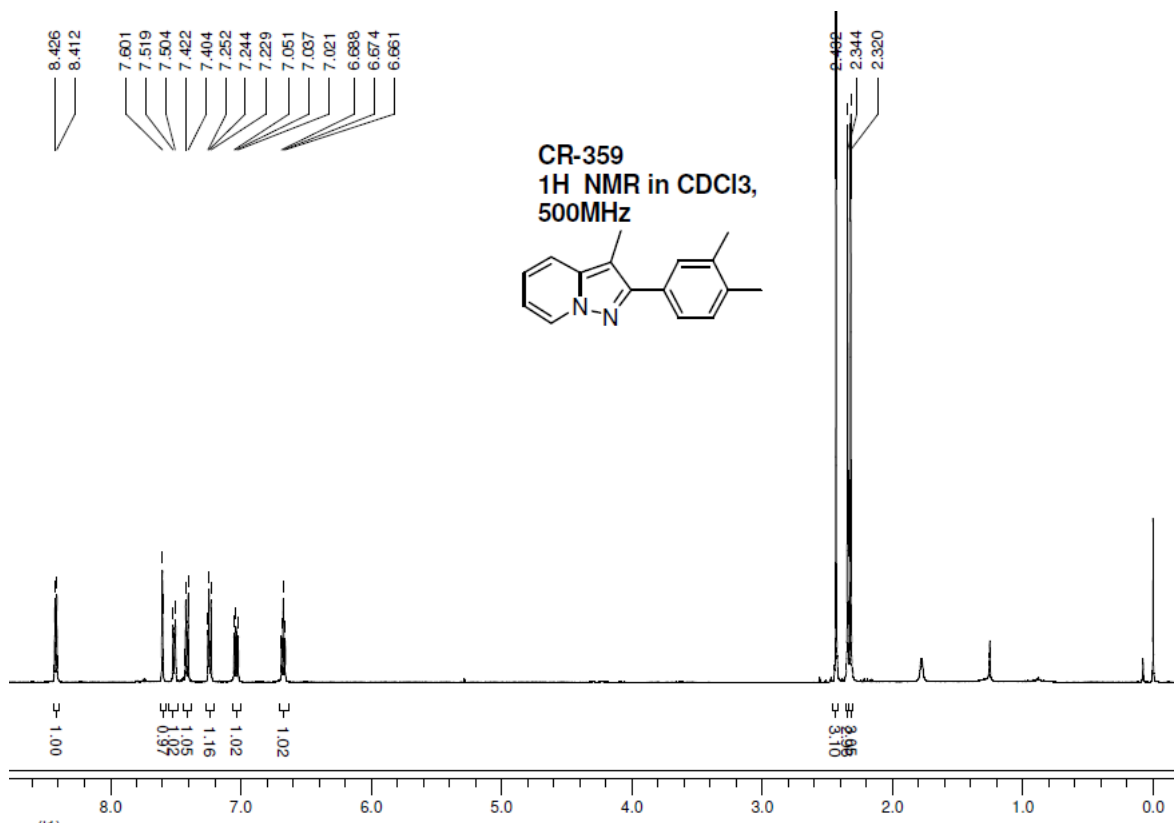

1H NMR of 3r

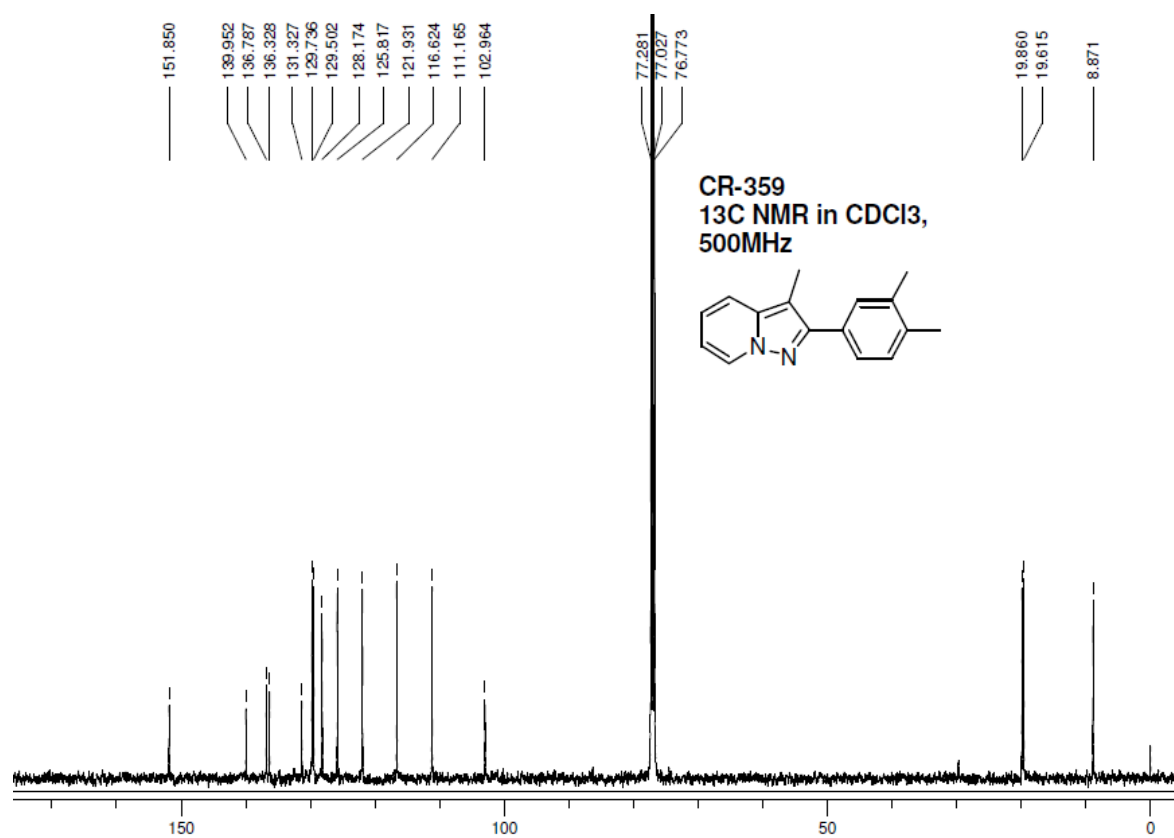

13C NMR of 3r

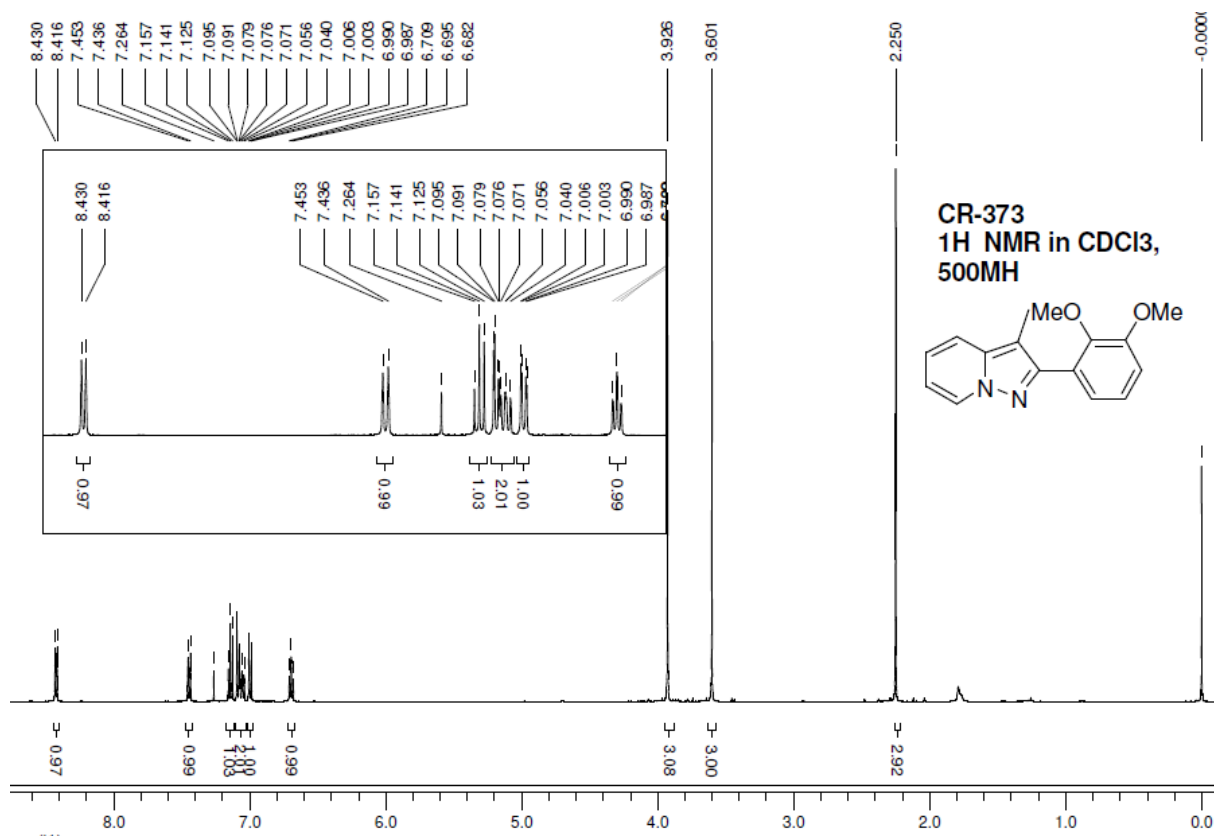

1H NMR of 3s

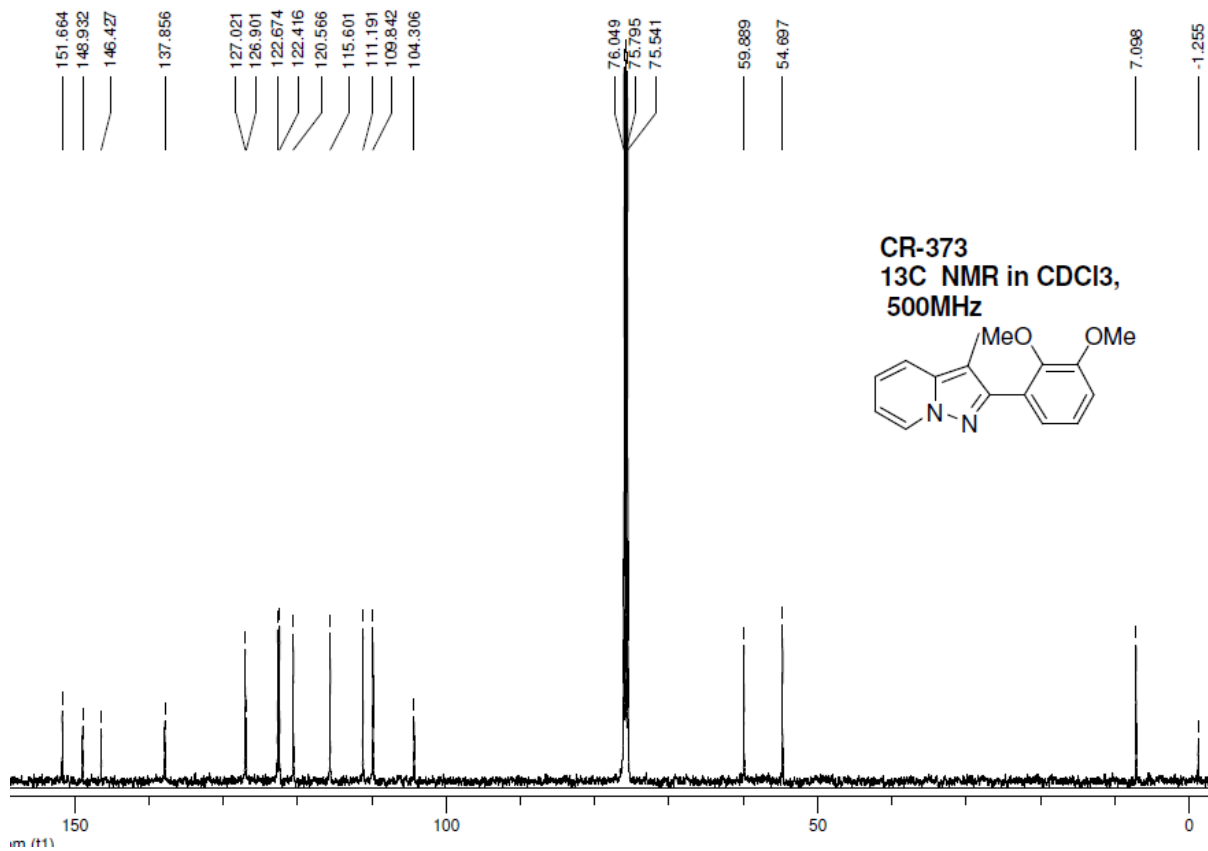

13C NMR of 3s

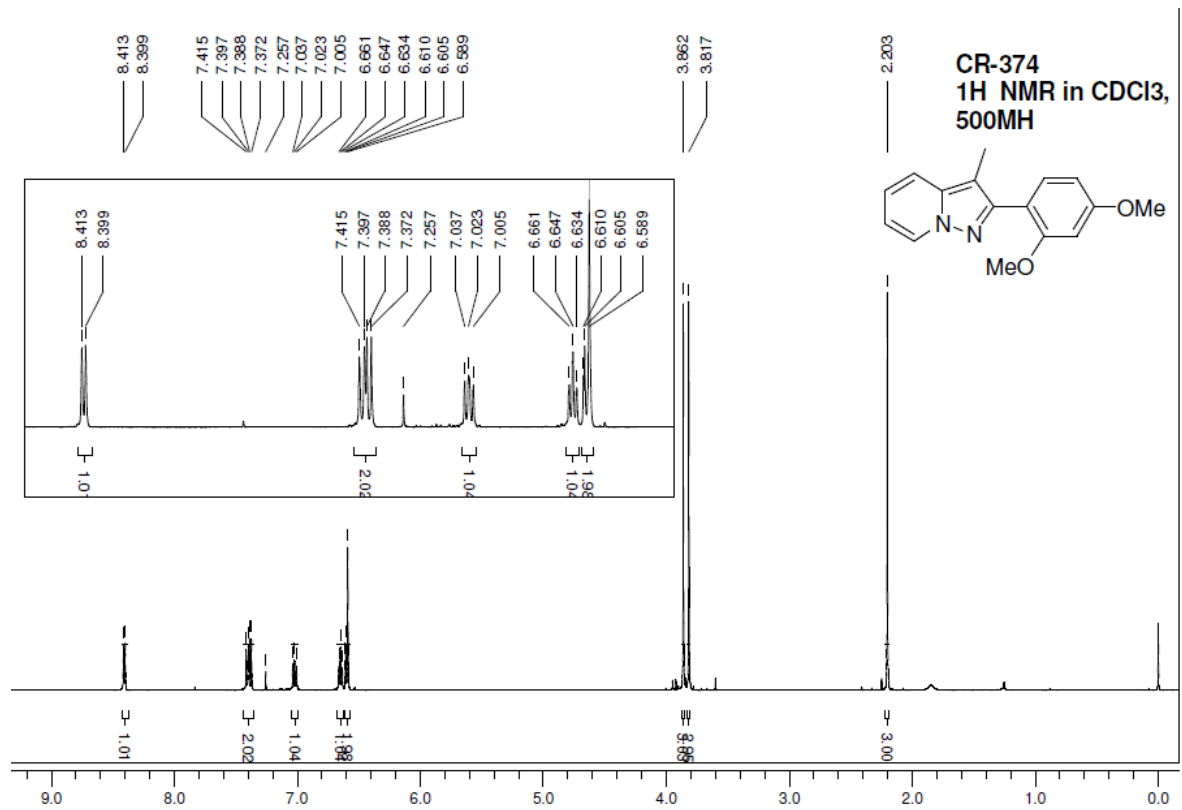

1H NMR of 3t

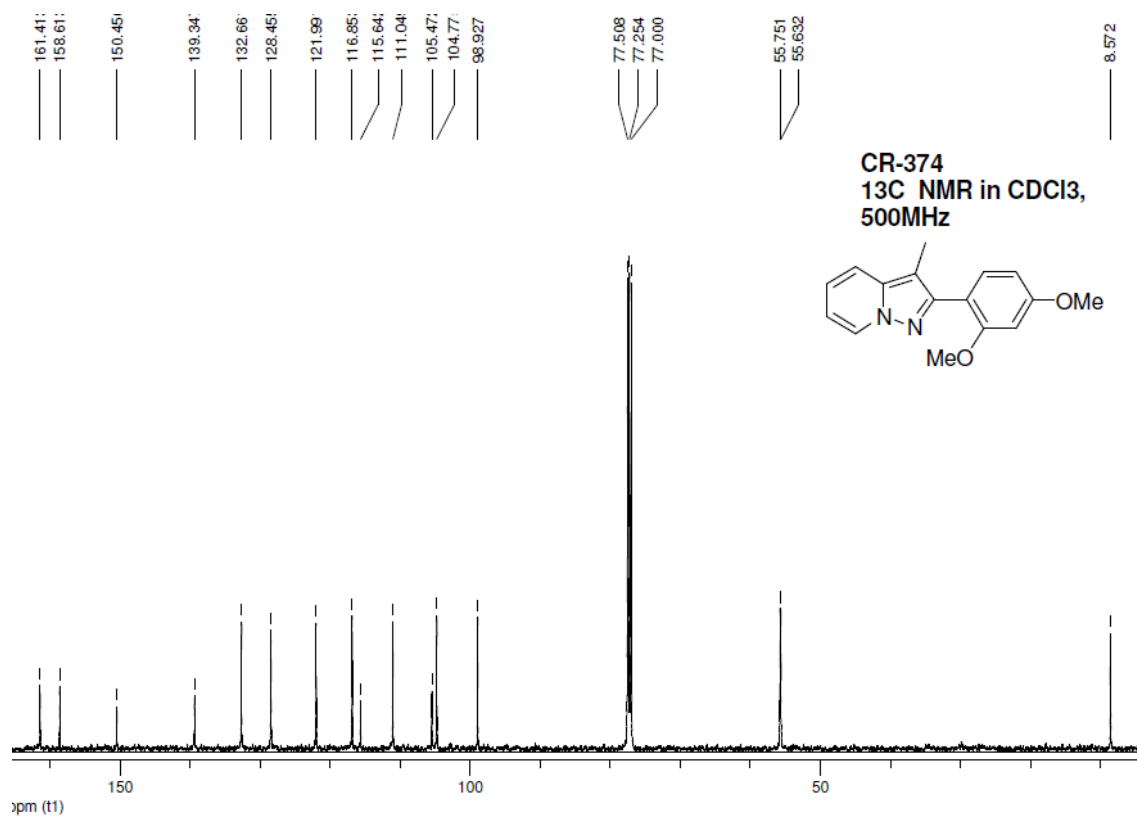

13C NMR of 3t



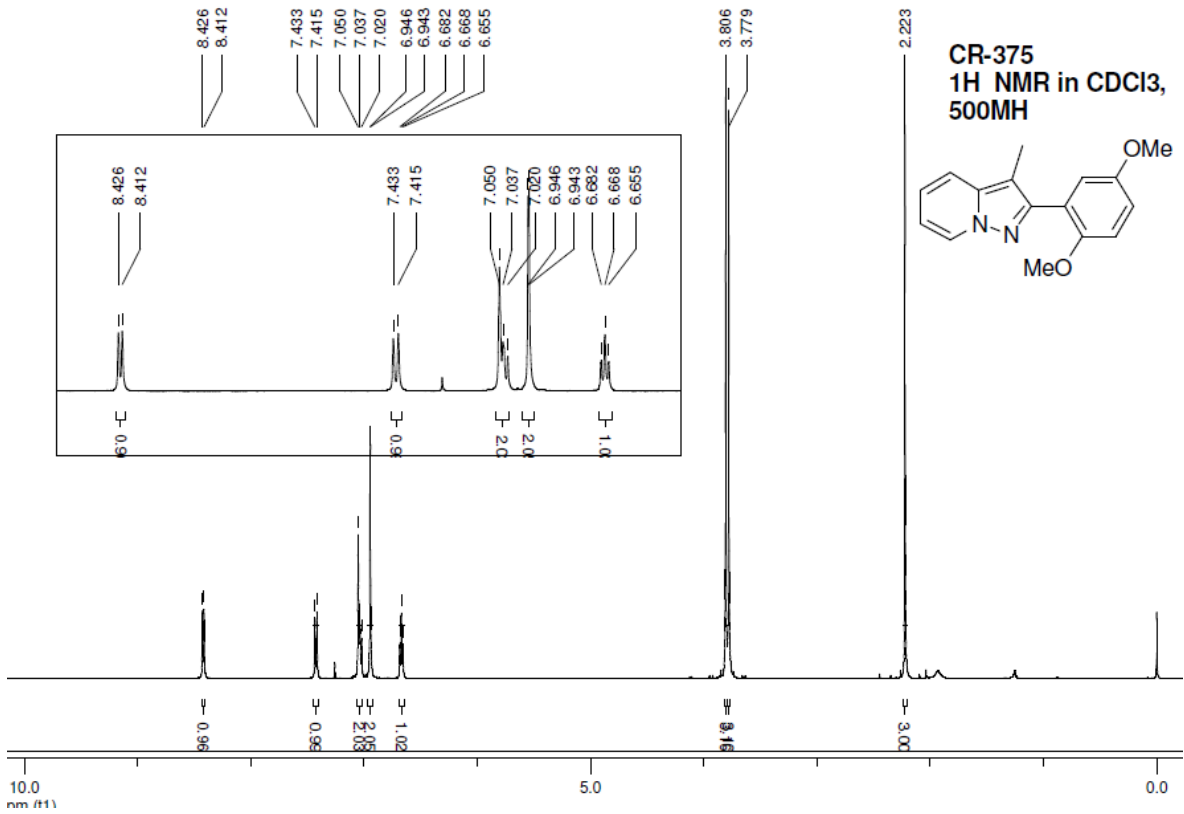

**<sup>1</sup>H NMR of 3u**

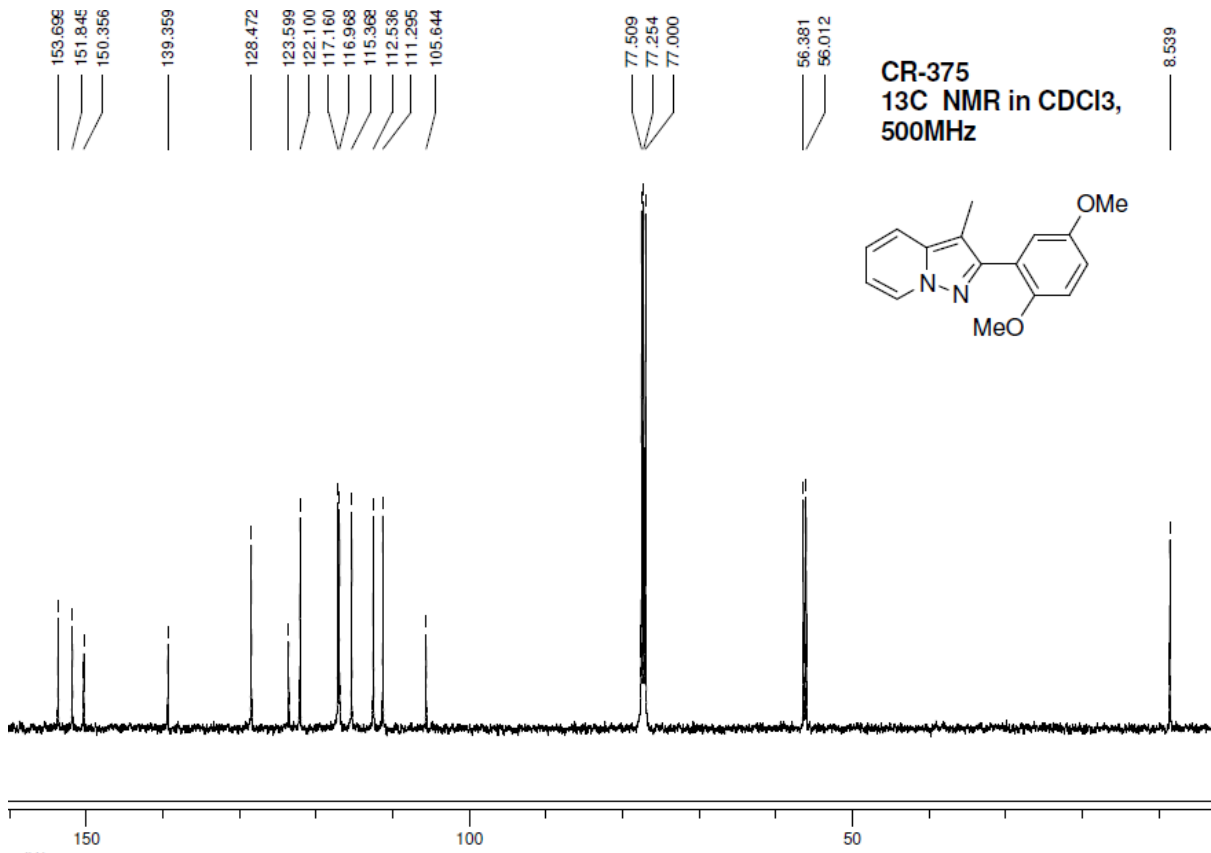

**<sup>13</sup>C NMR of 3u**

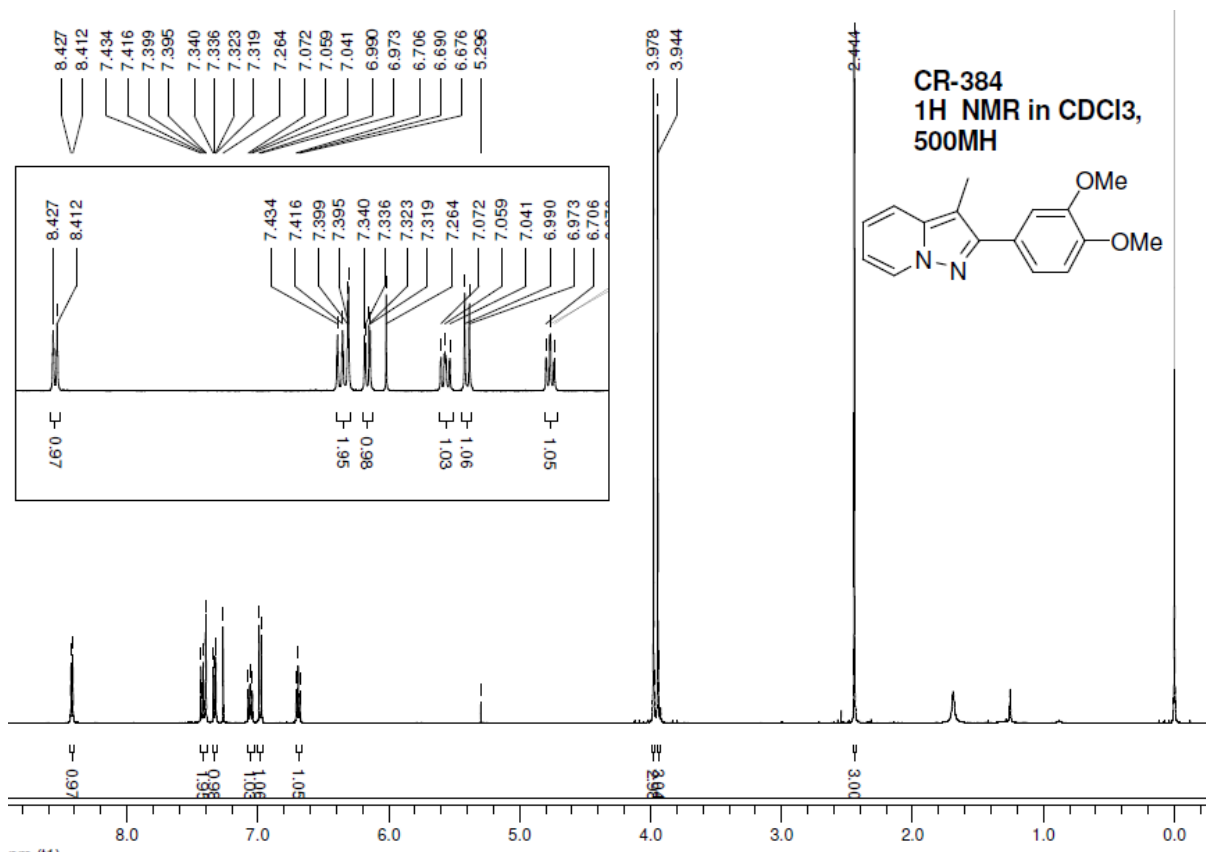

**<sup>1</sup>H NMR of 3v**

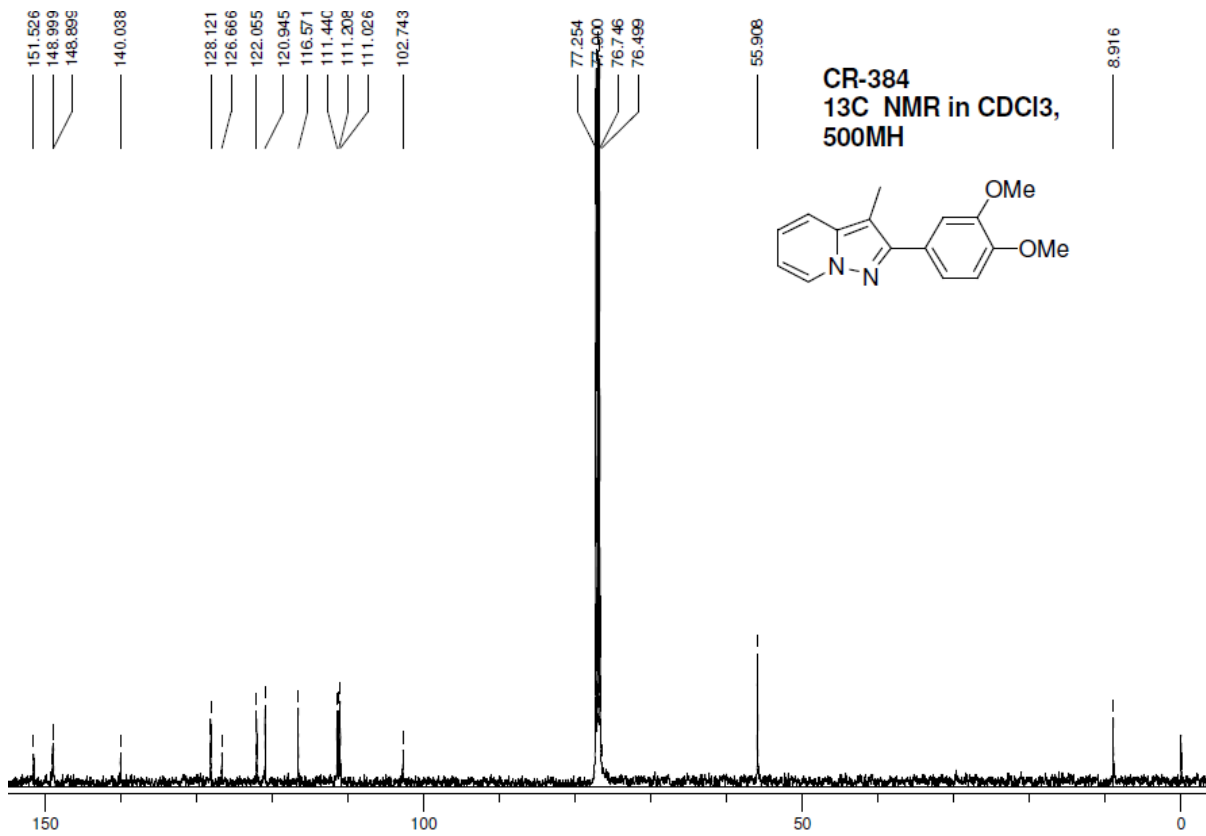

**<sup>13</sup>C NMR of 3v**



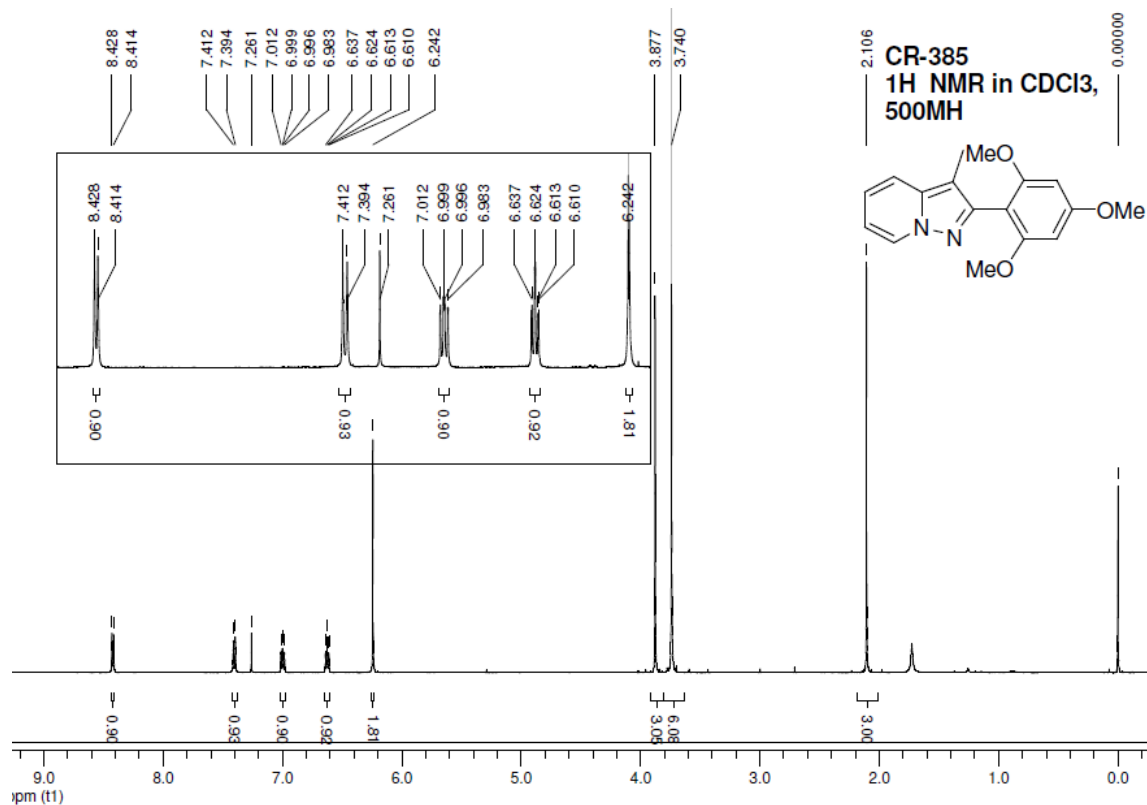

**13C NMR of 3x**

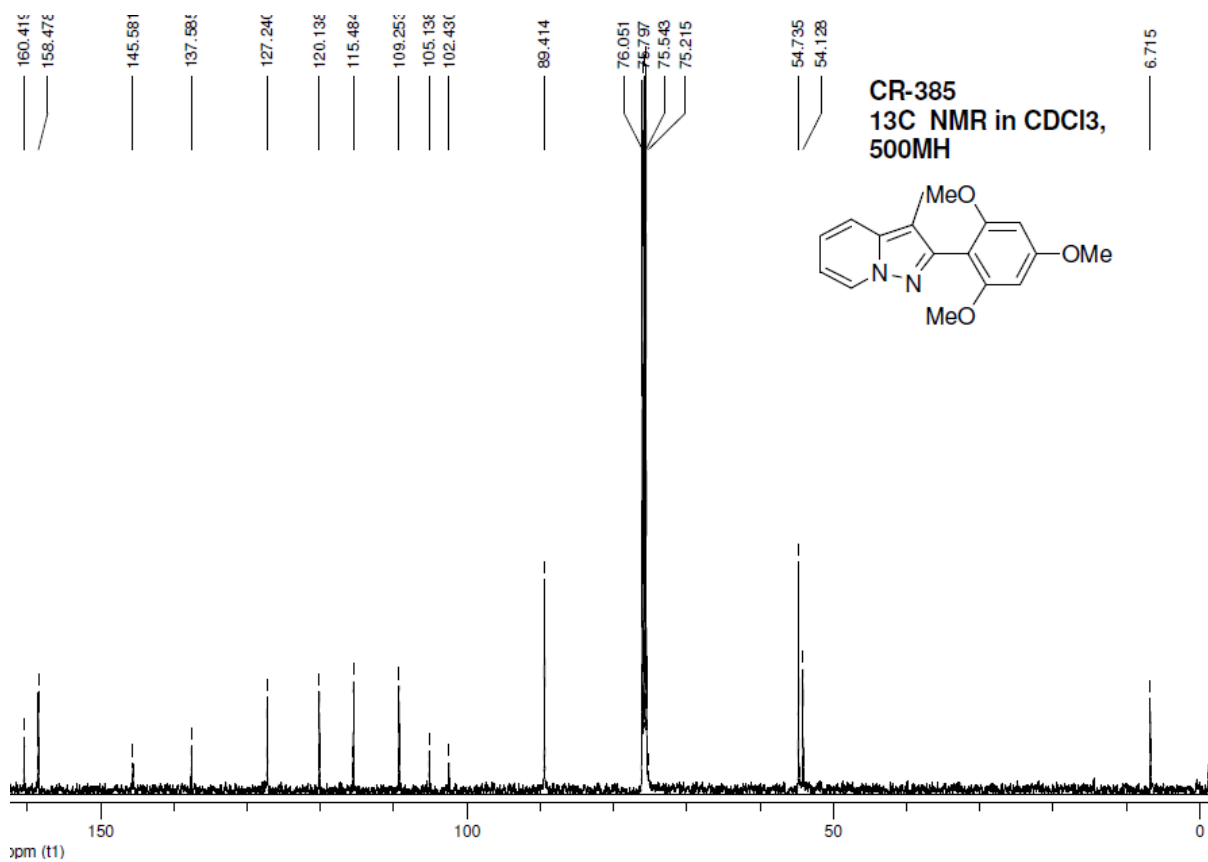

**13C NMR of 3x**

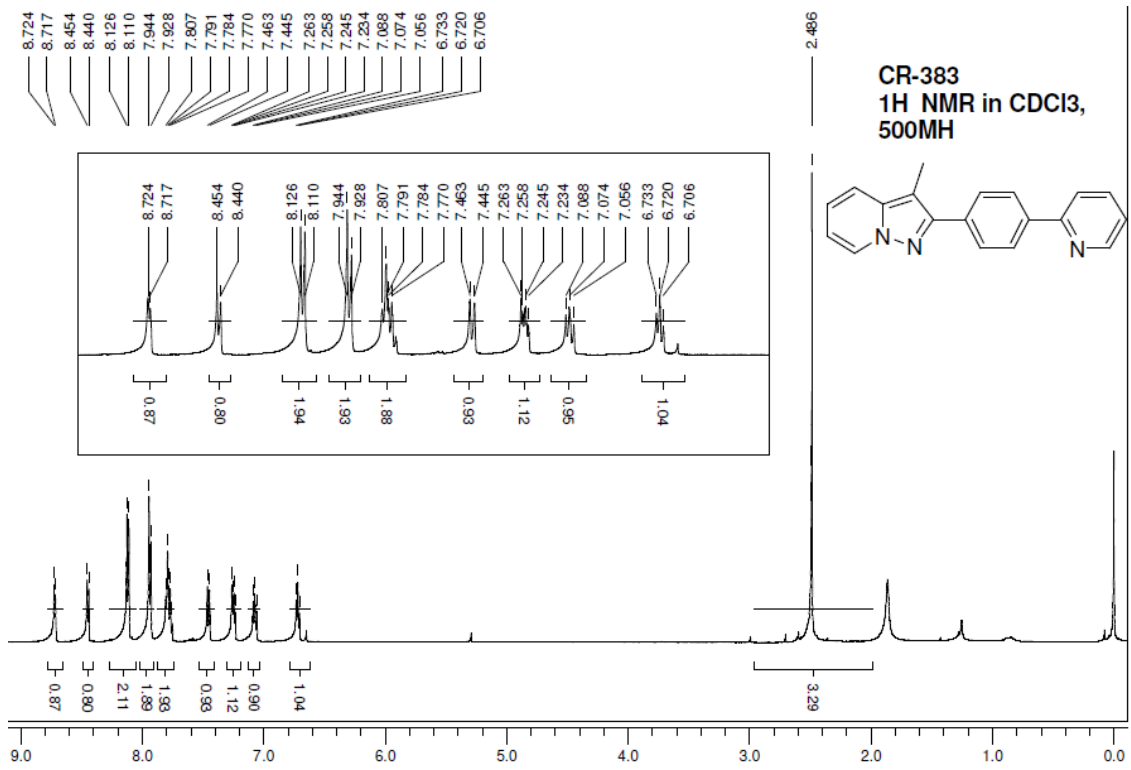

1H NMR of 3y

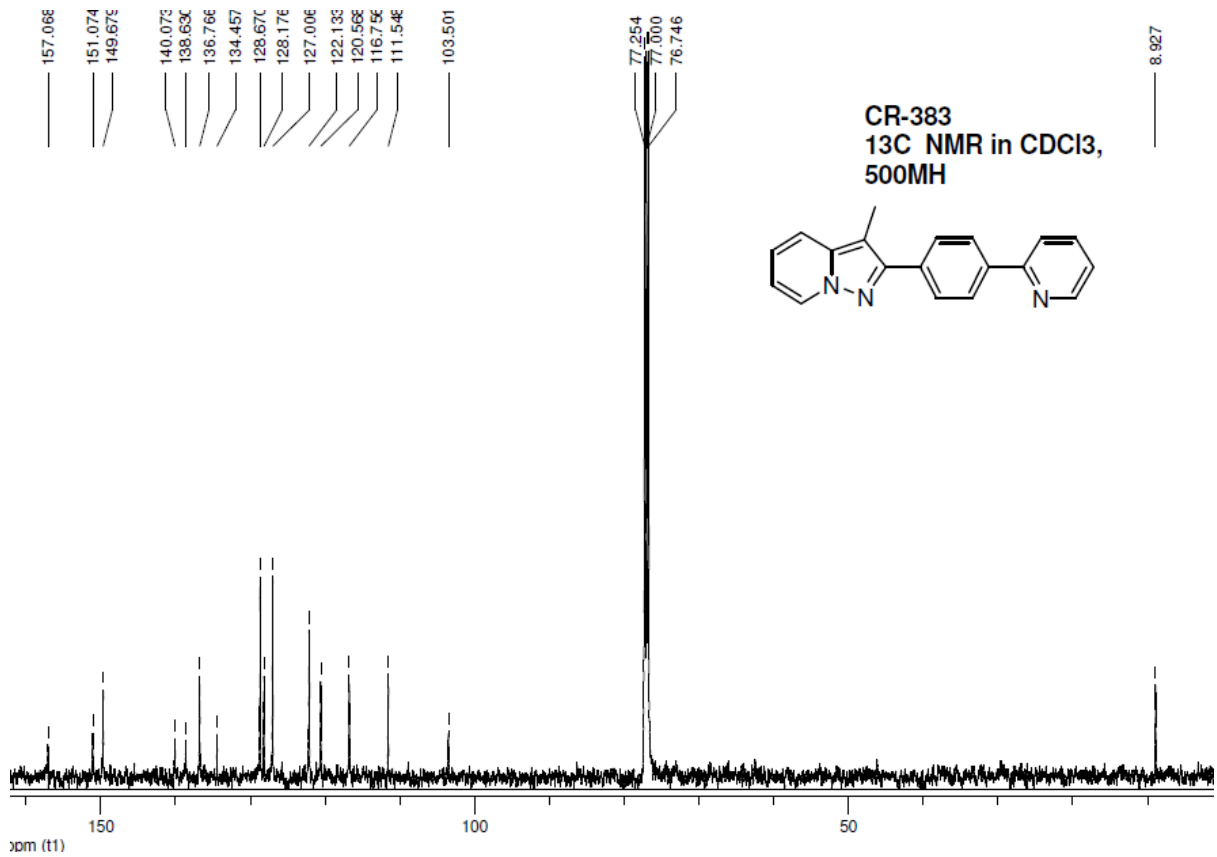

13C NMR of 3y

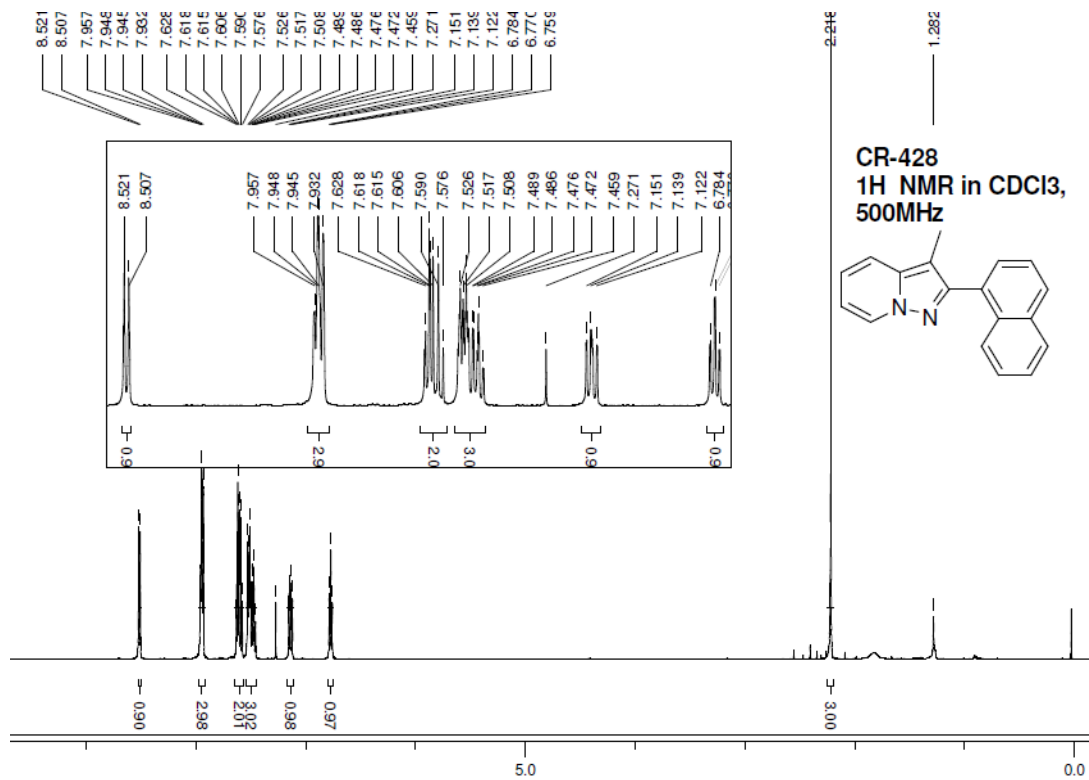

**<sup>1</sup>H NMR of 3z**

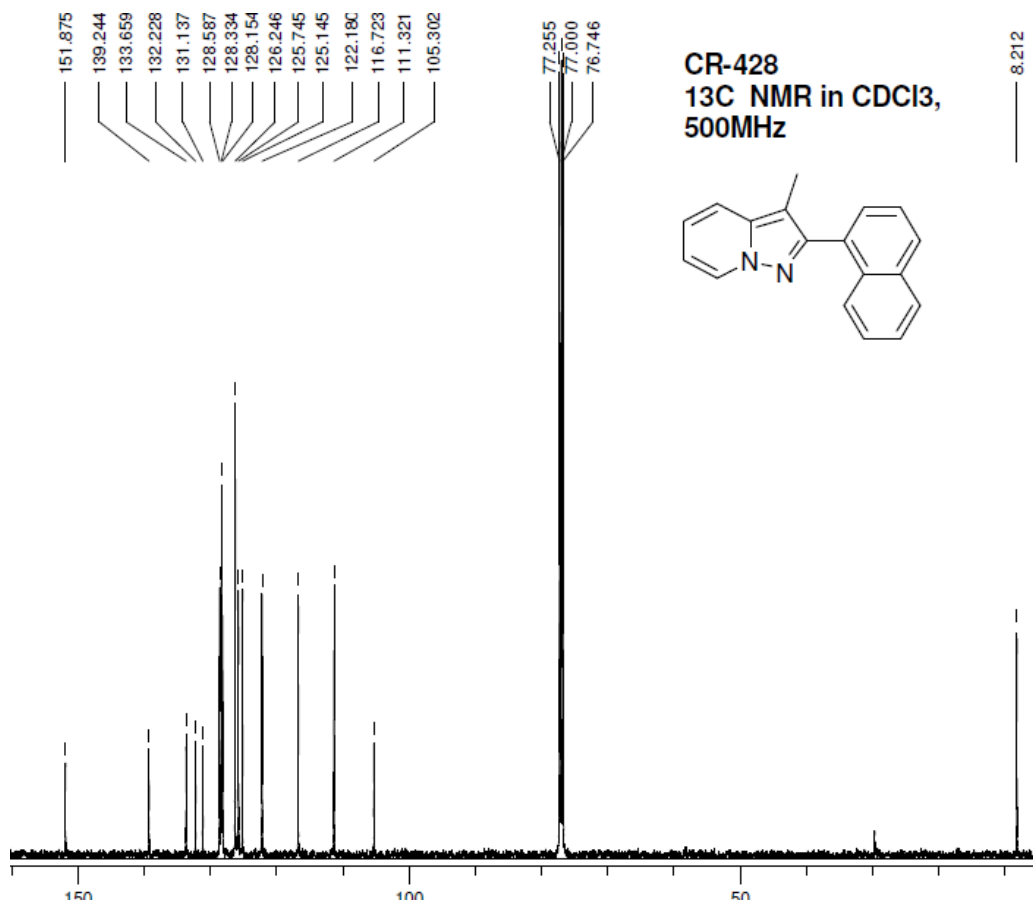

**<sup>13</sup>C NMR of 3z**

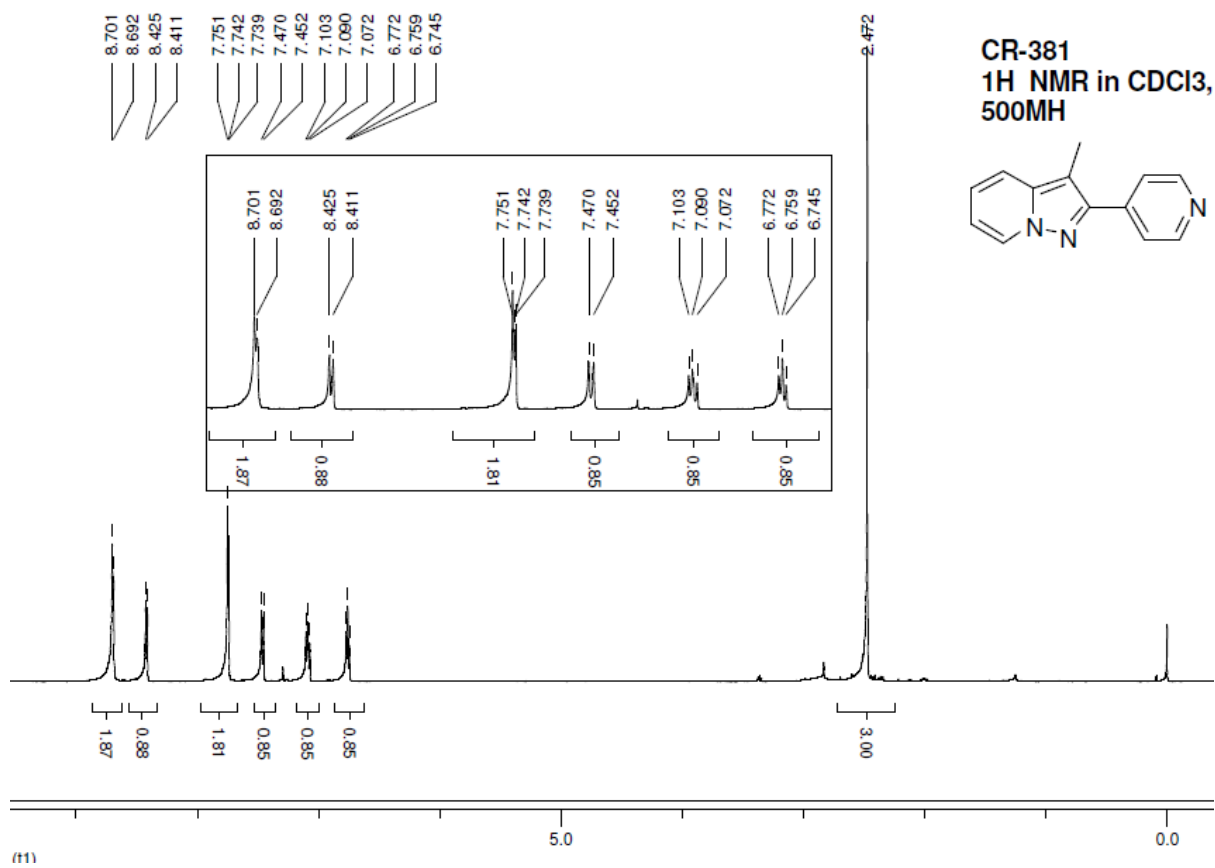

**<sup>1</sup>H NMR of 3ab**

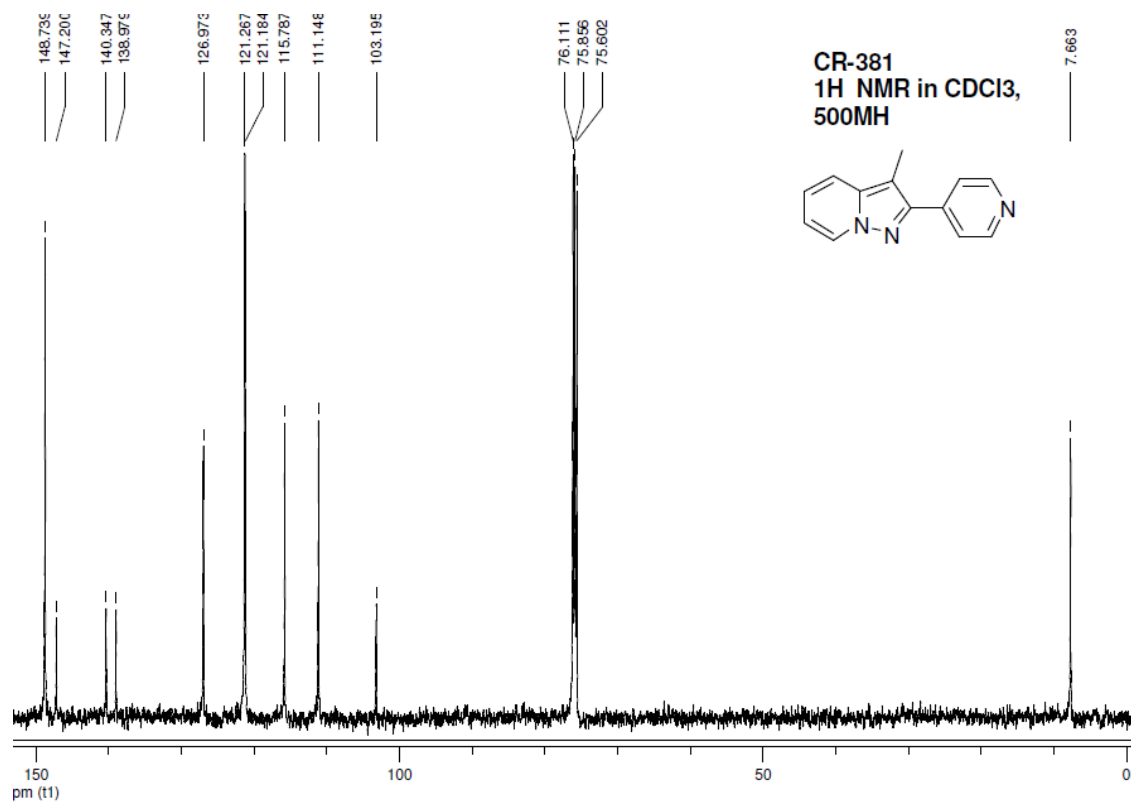

**<sup>13</sup>C NMR of 3ab**

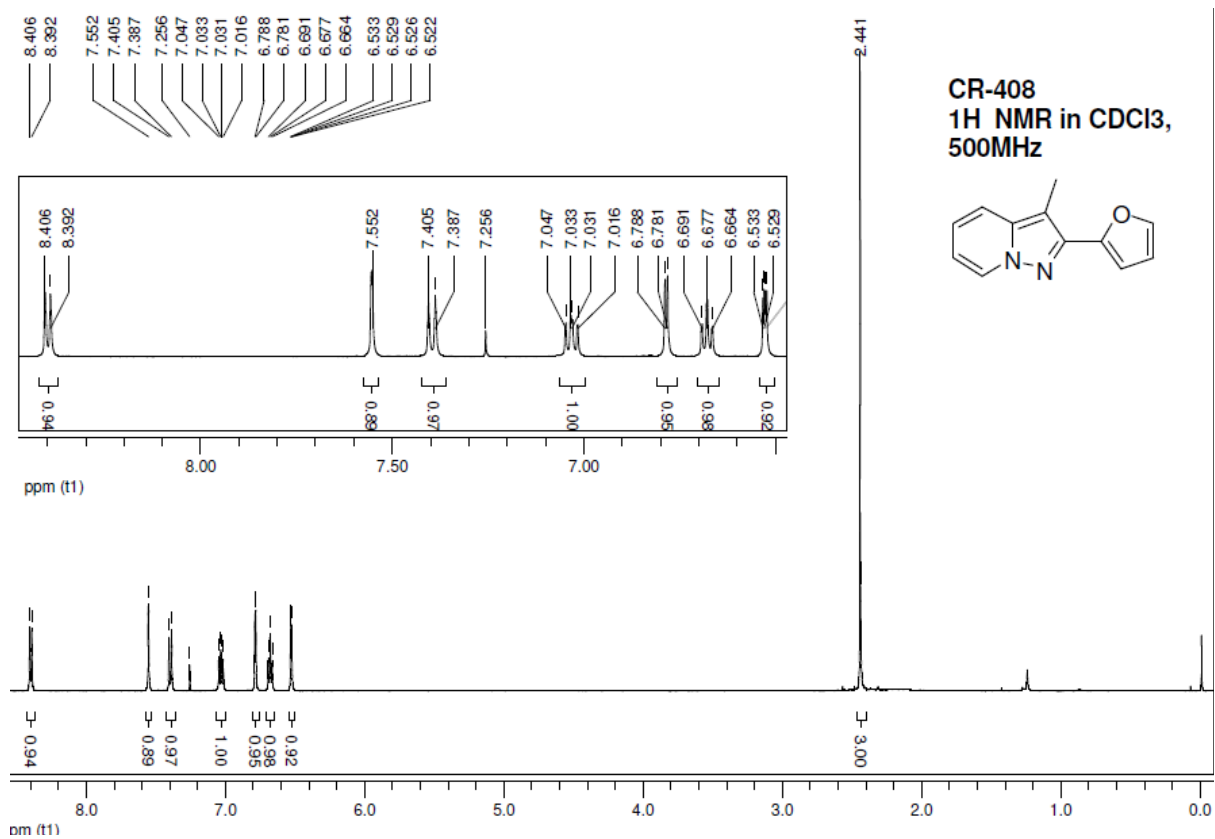

**<sup>1</sup>H NMR of 3ac**

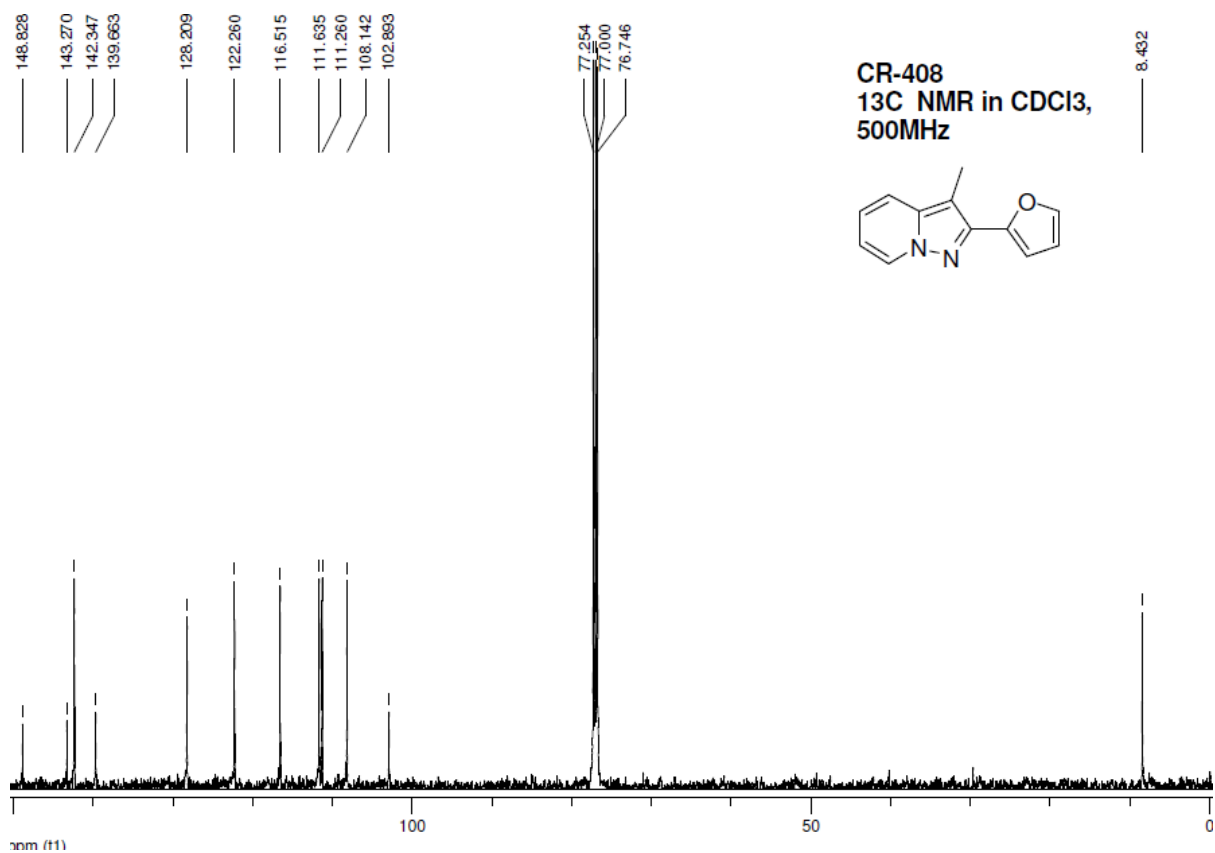

**<sup>13</sup>C NMR of 3ac**



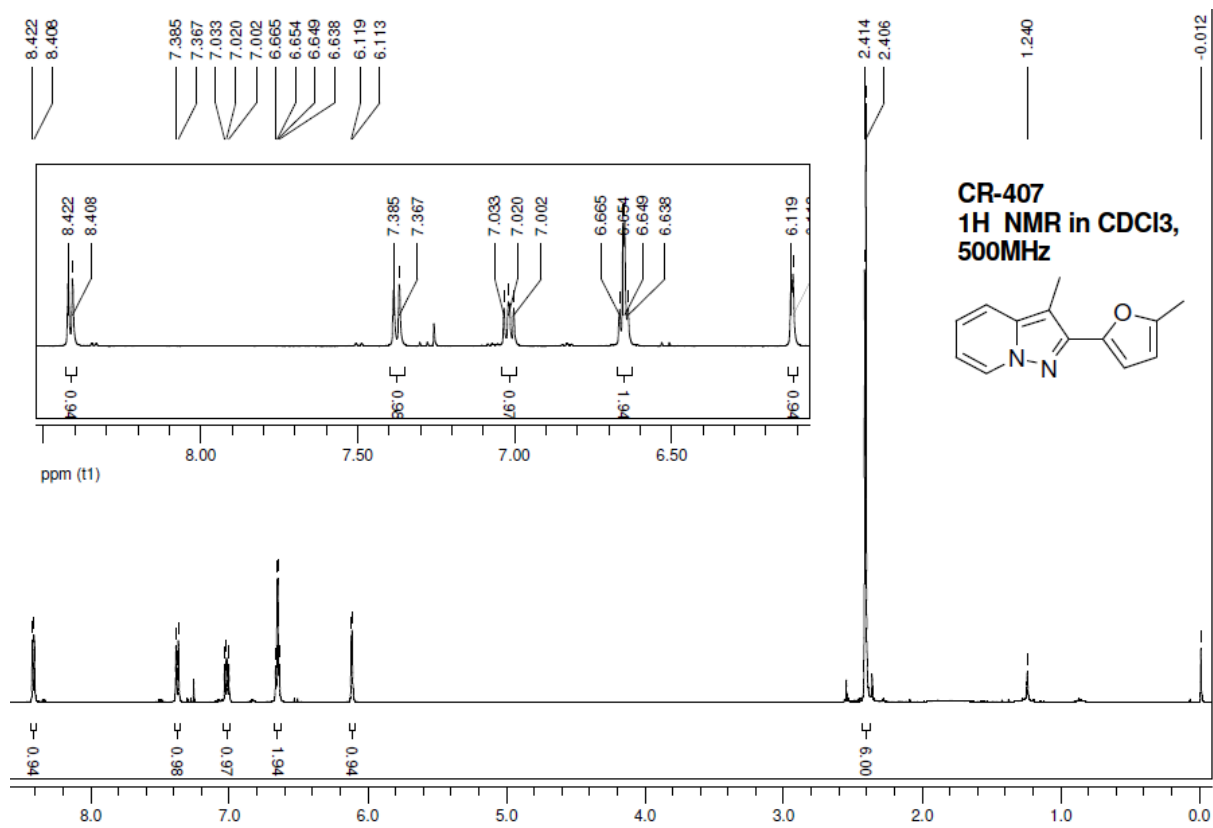

1H NMR of 3ad

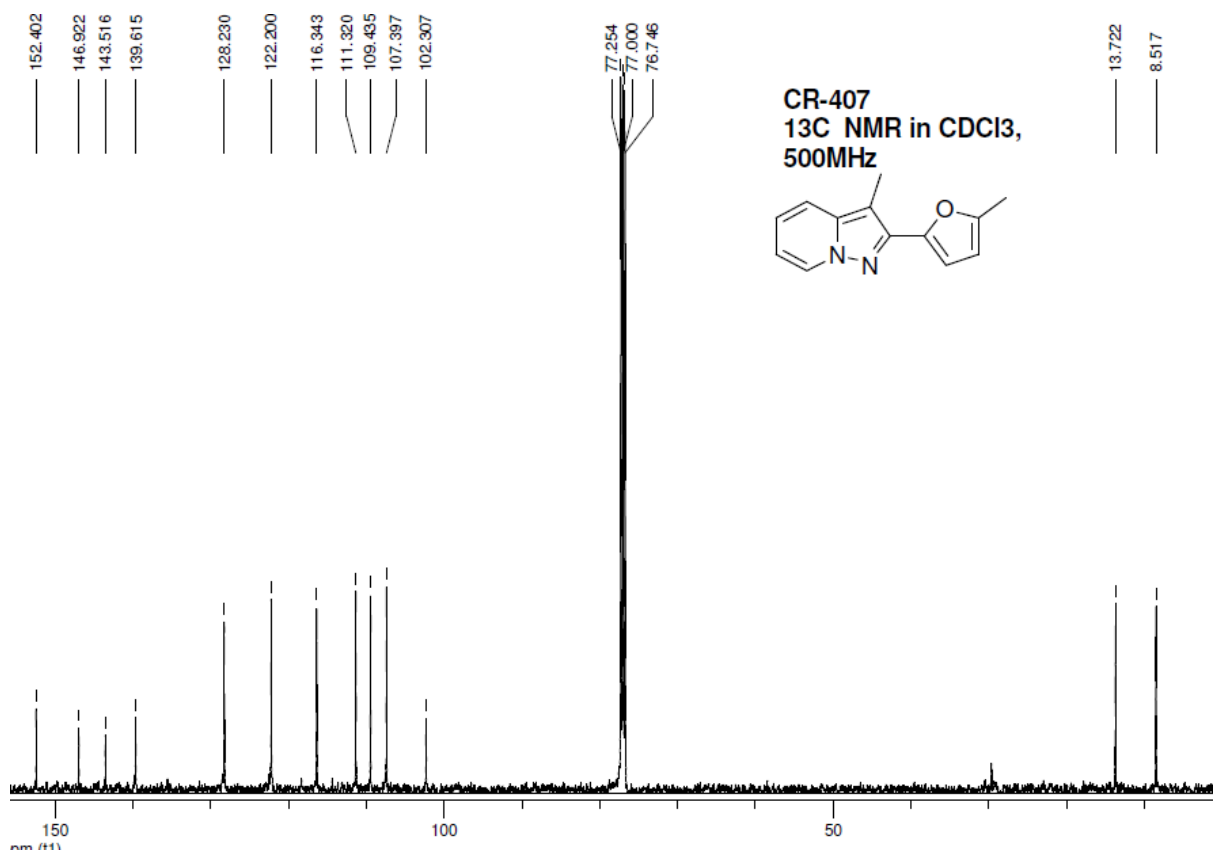

13C NMR of 3ad

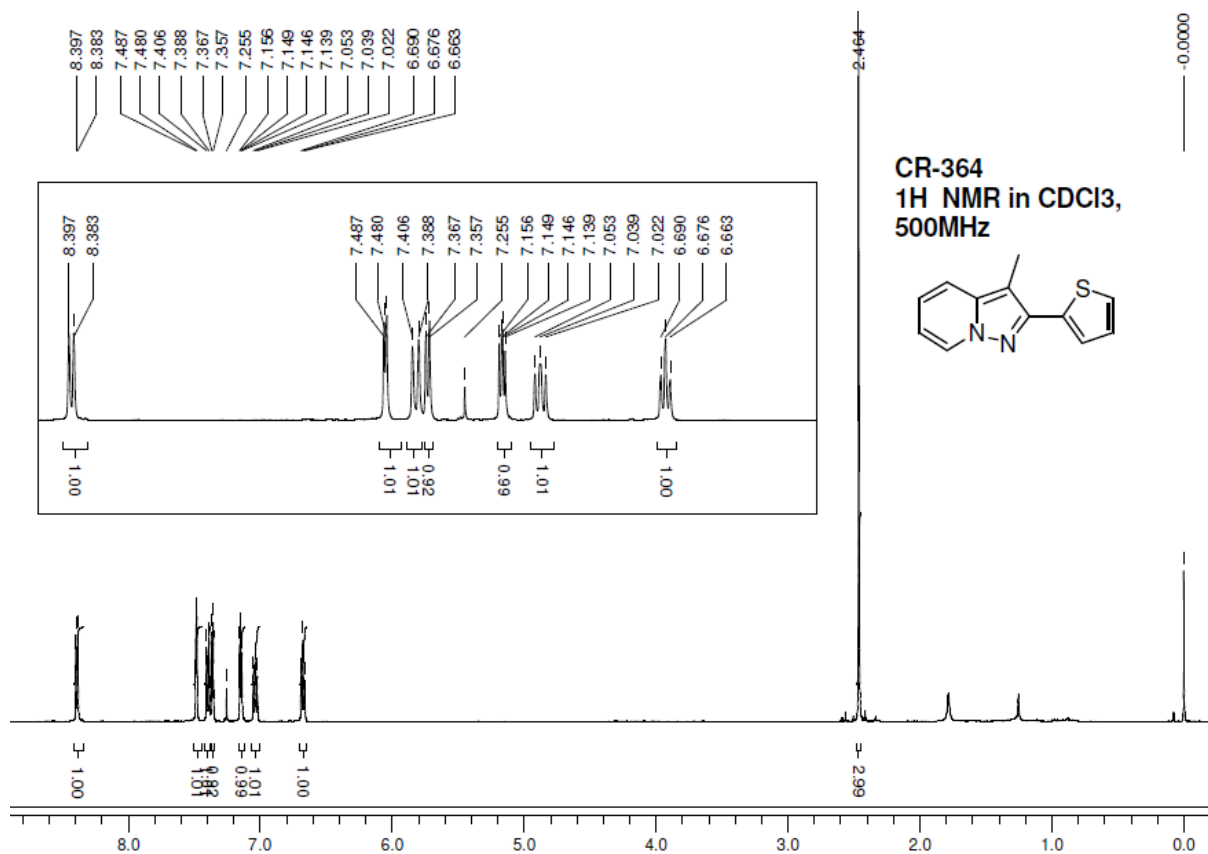

1H NMR of 3ae

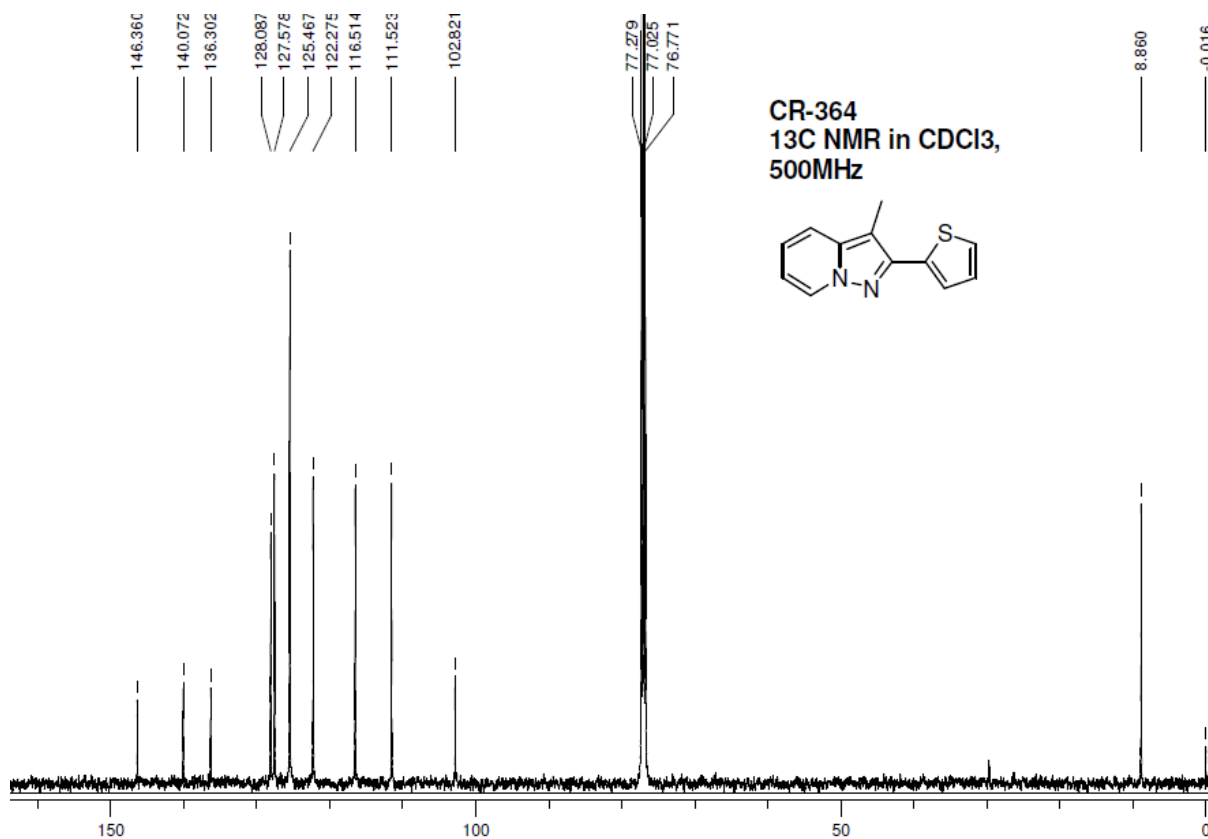

13C NMR of 3ae

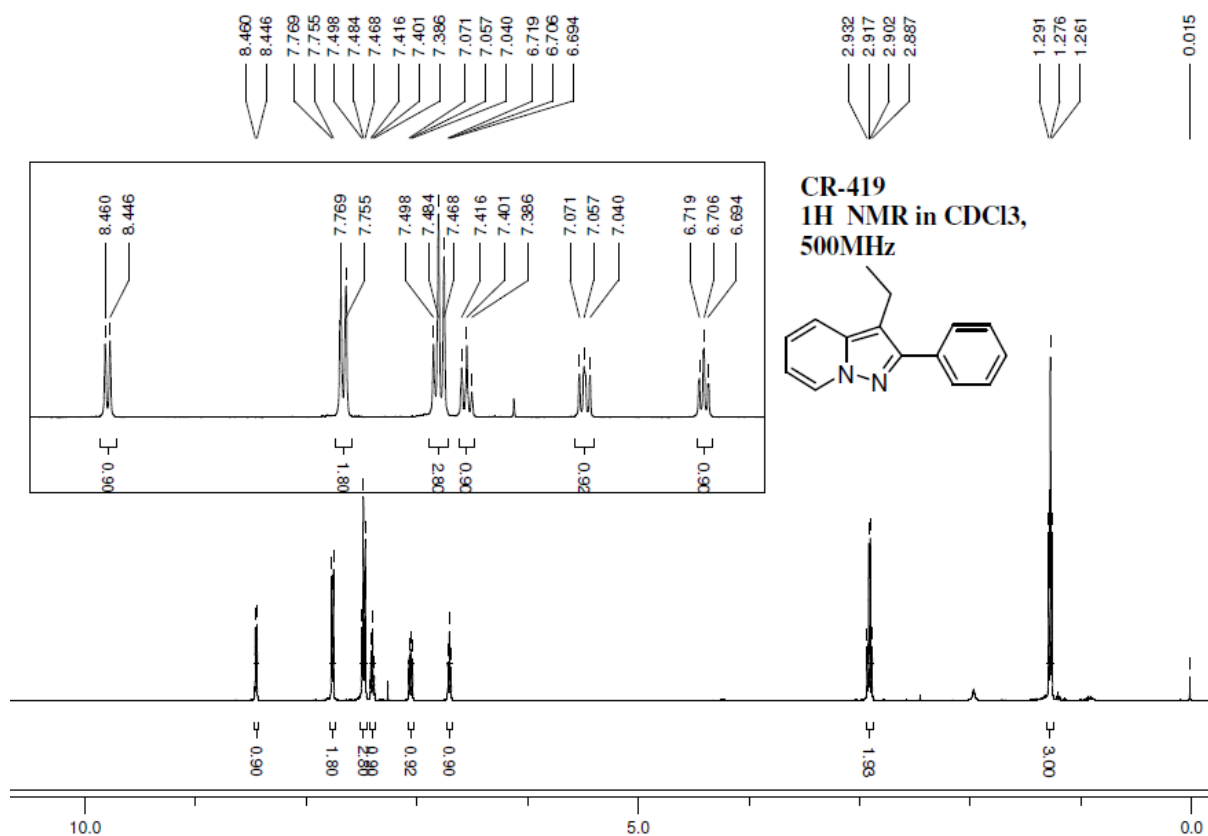

**<sup>1</sup>H NMR of 3af**

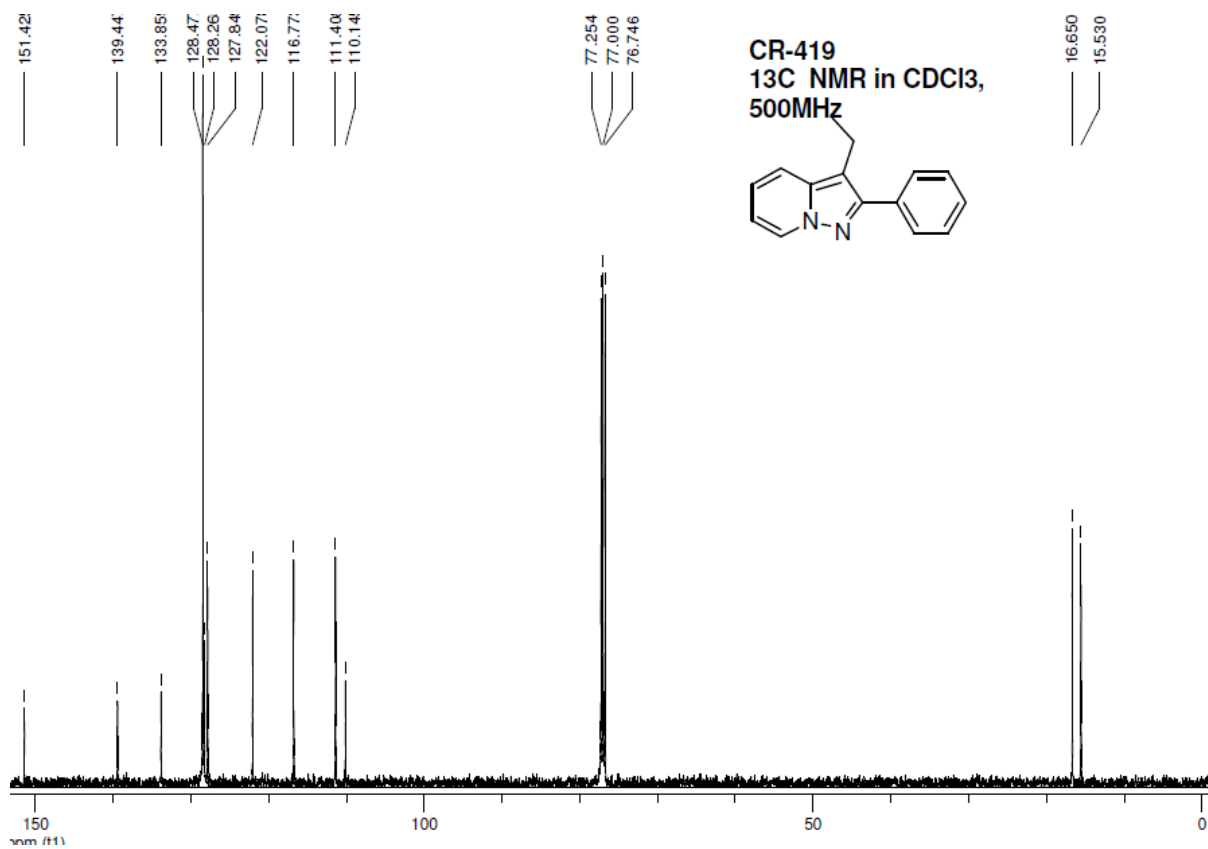

**<sup>13</sup>C NMR of 3af**

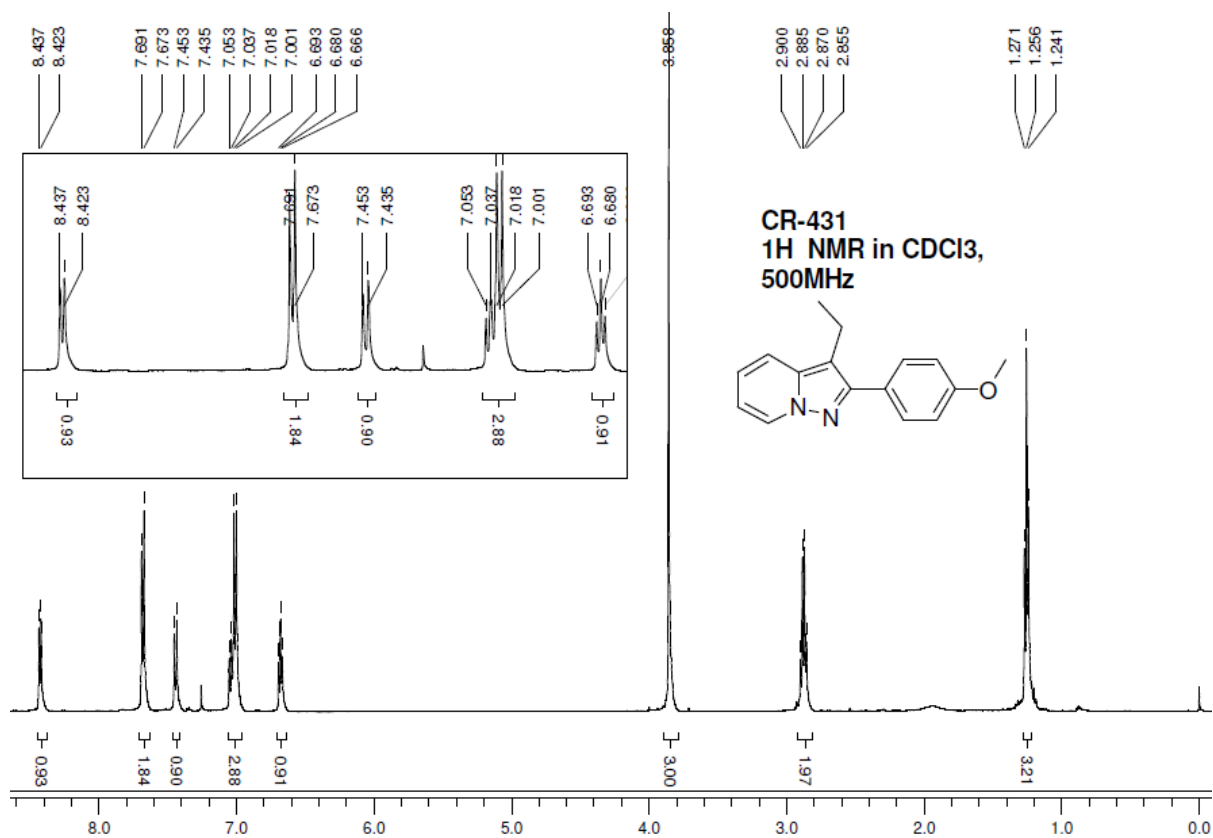

**<sup>1</sup>H NMR of 3ag**

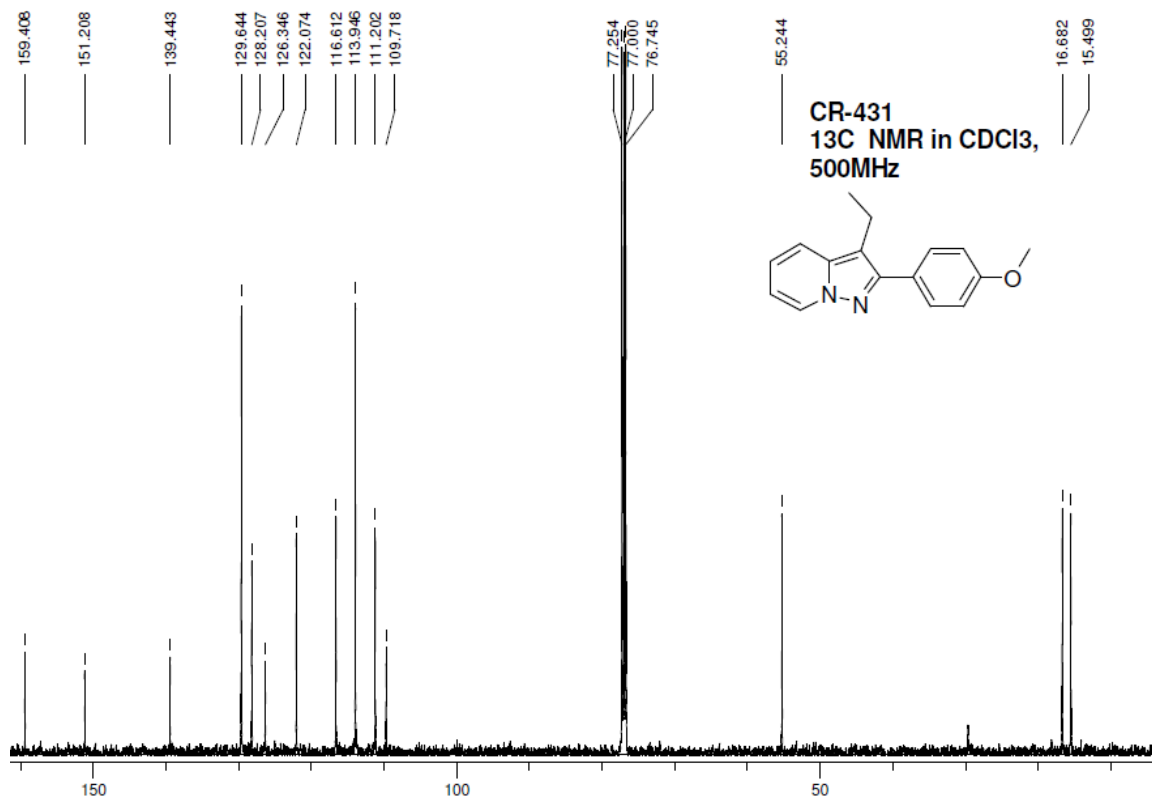

**<sup>13</sup>C NMR of 3ag**

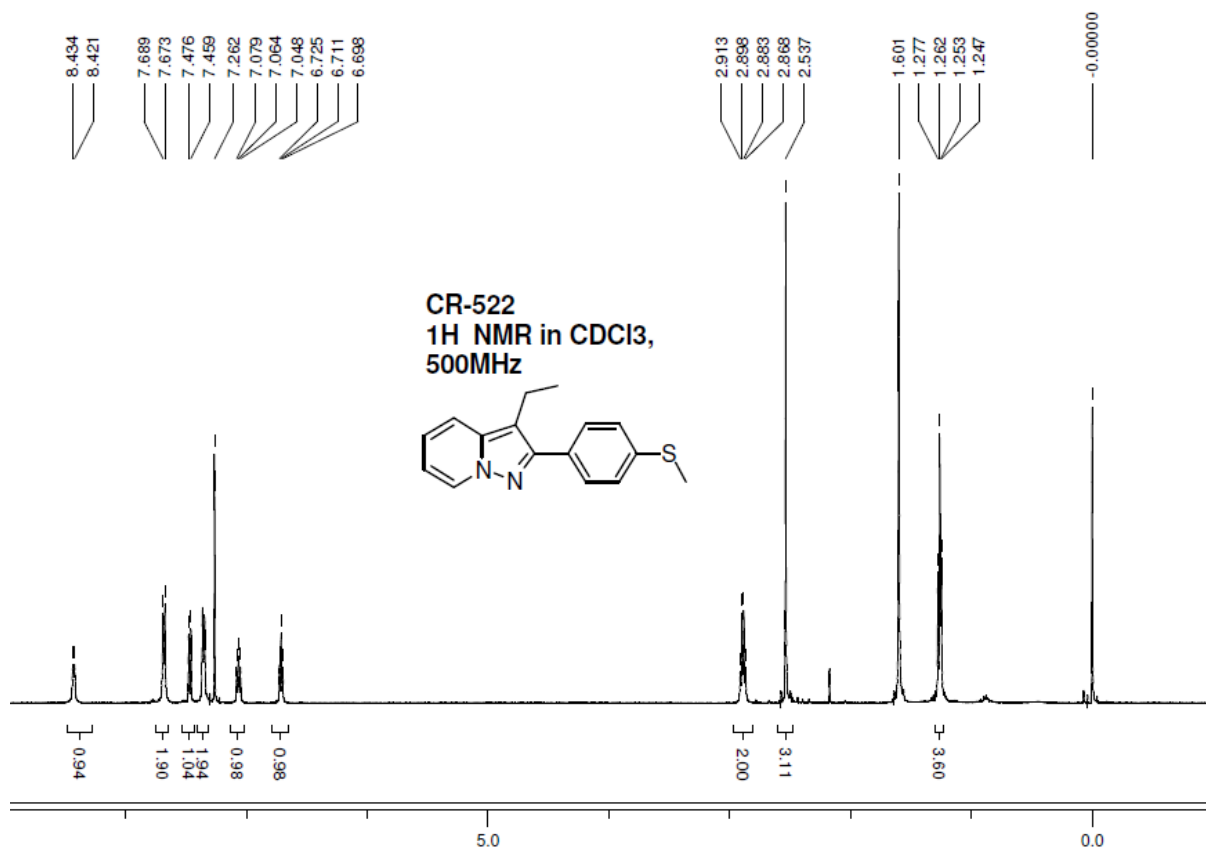

1H NMR of 3ah

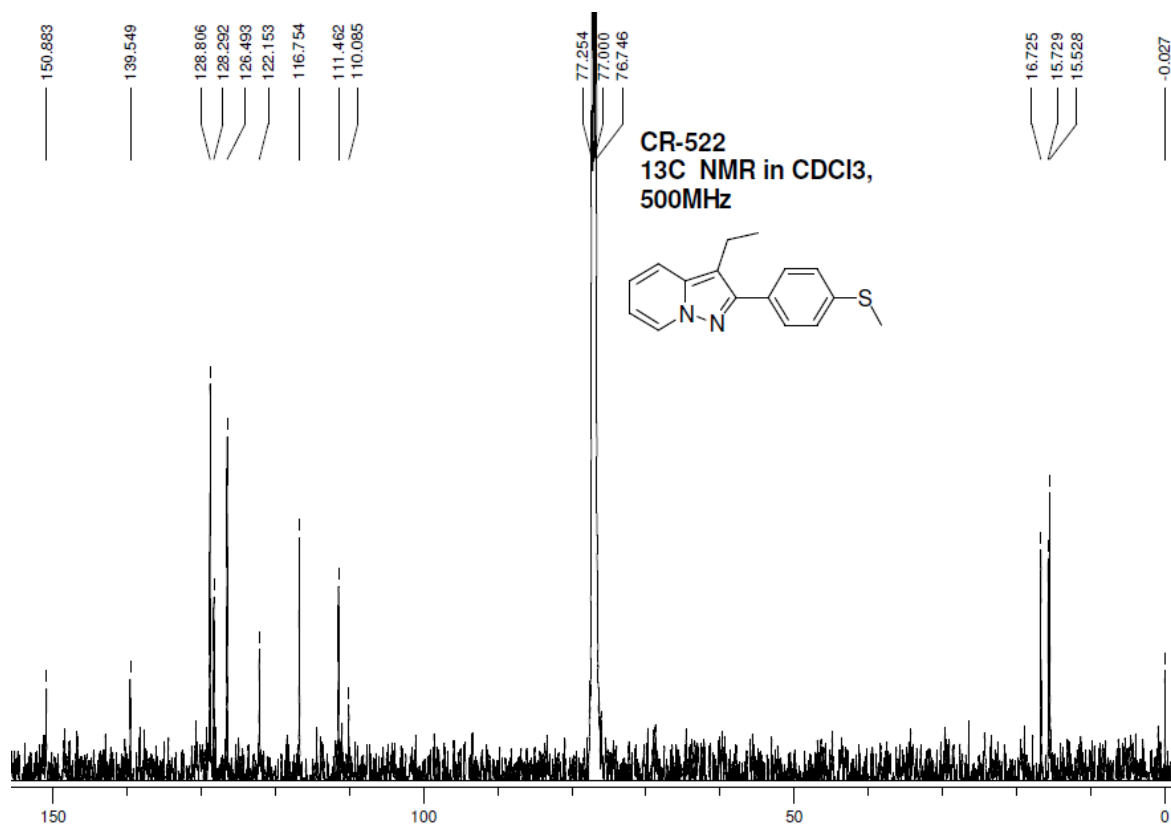

13C NMR of 3ah

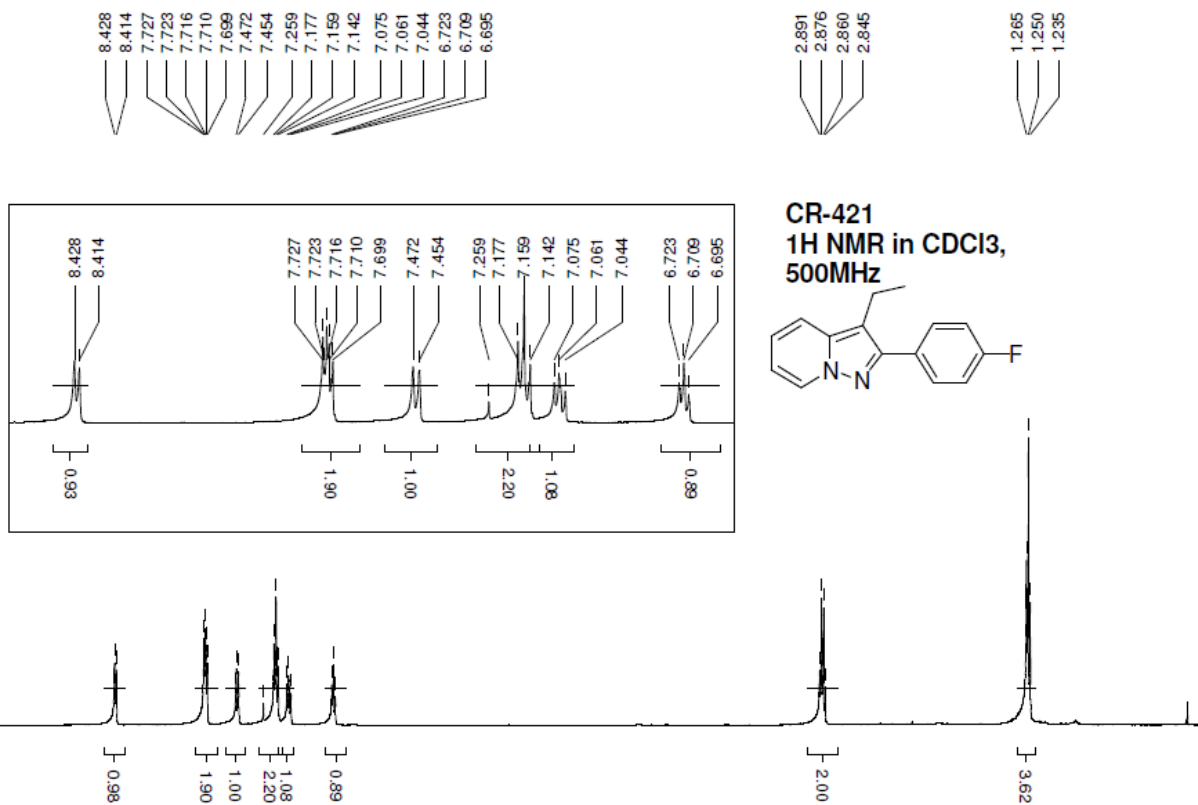

**<sup>1</sup>H NMR of 3ai**

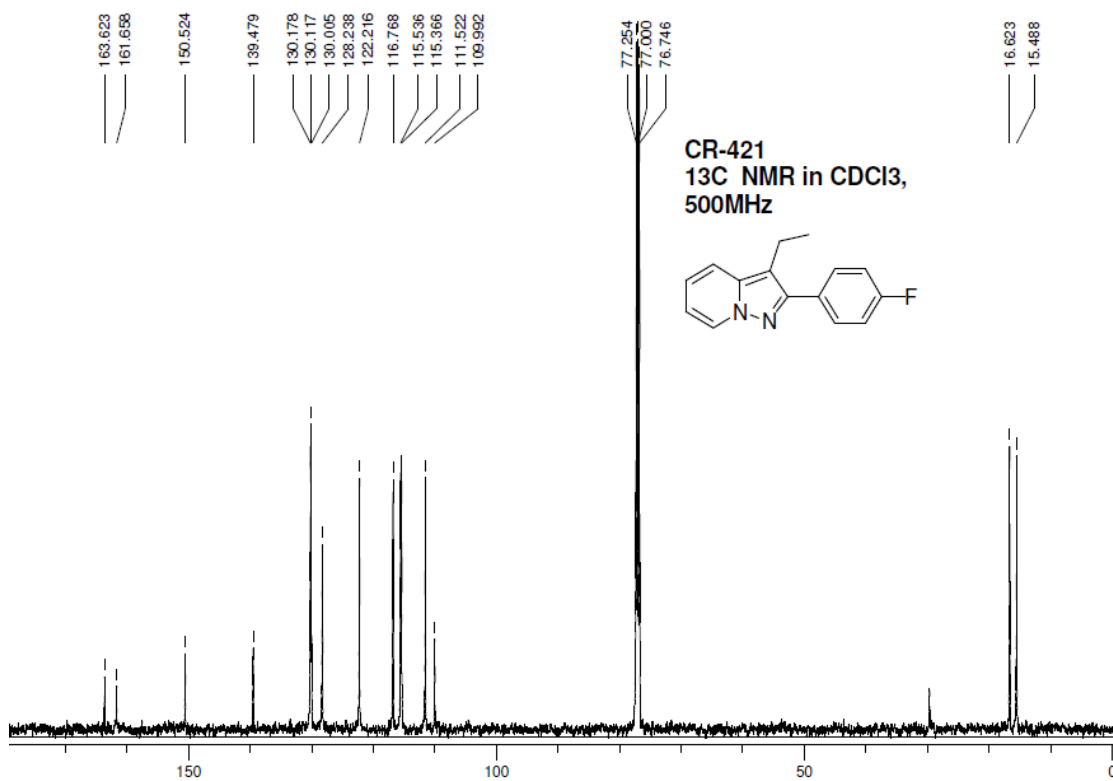

**<sup>13</sup>C NMR of 3ai**

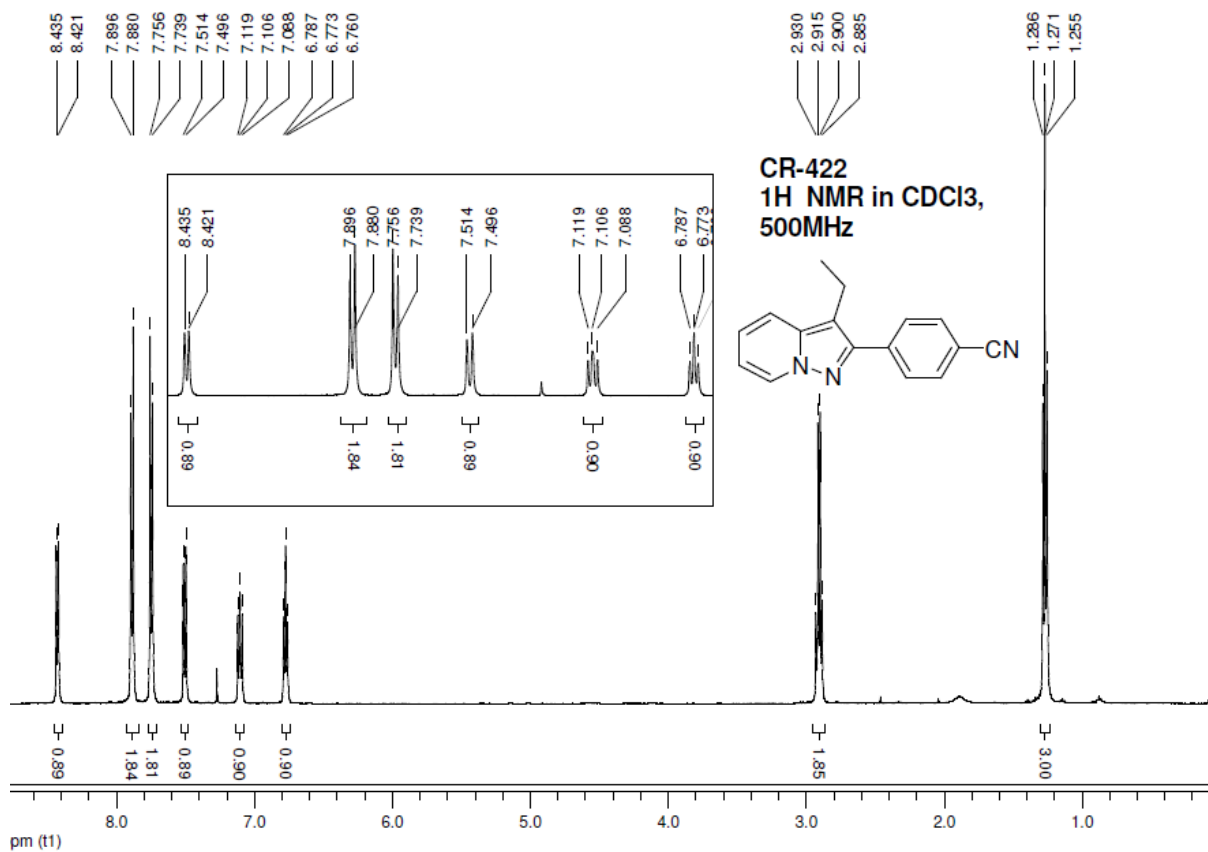

1H NMR of 3aj

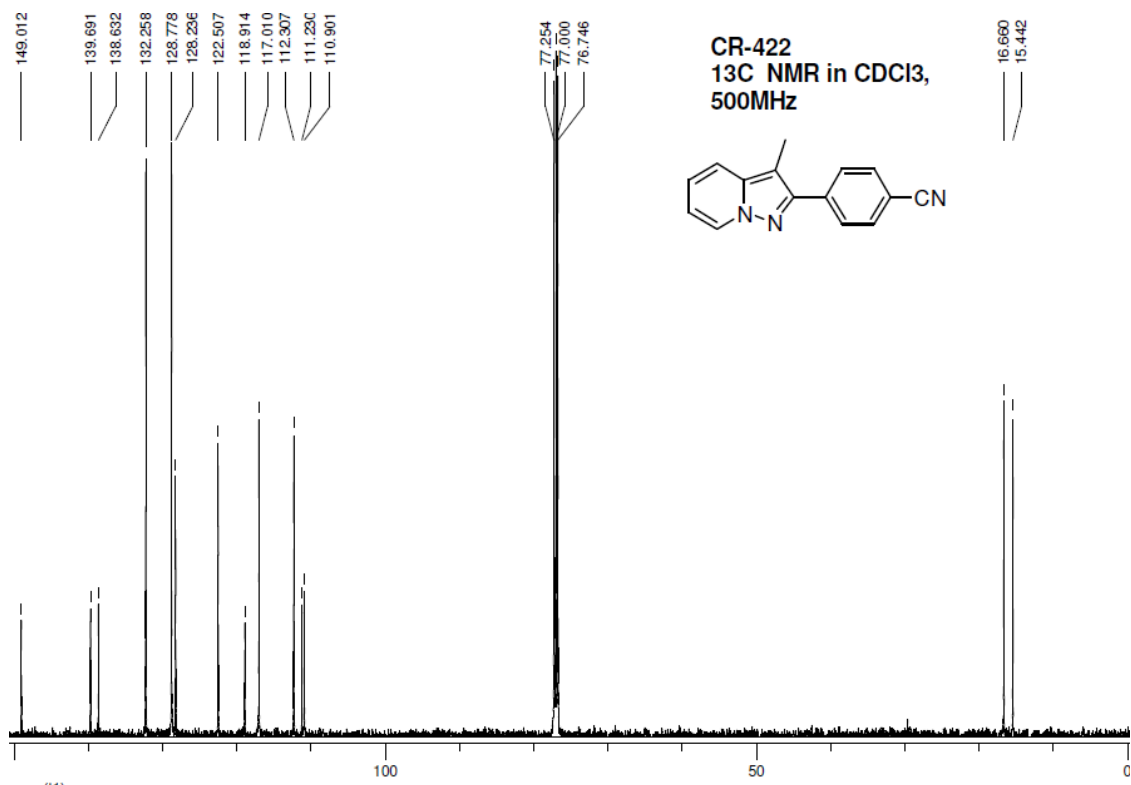

13C NMR of 3aj





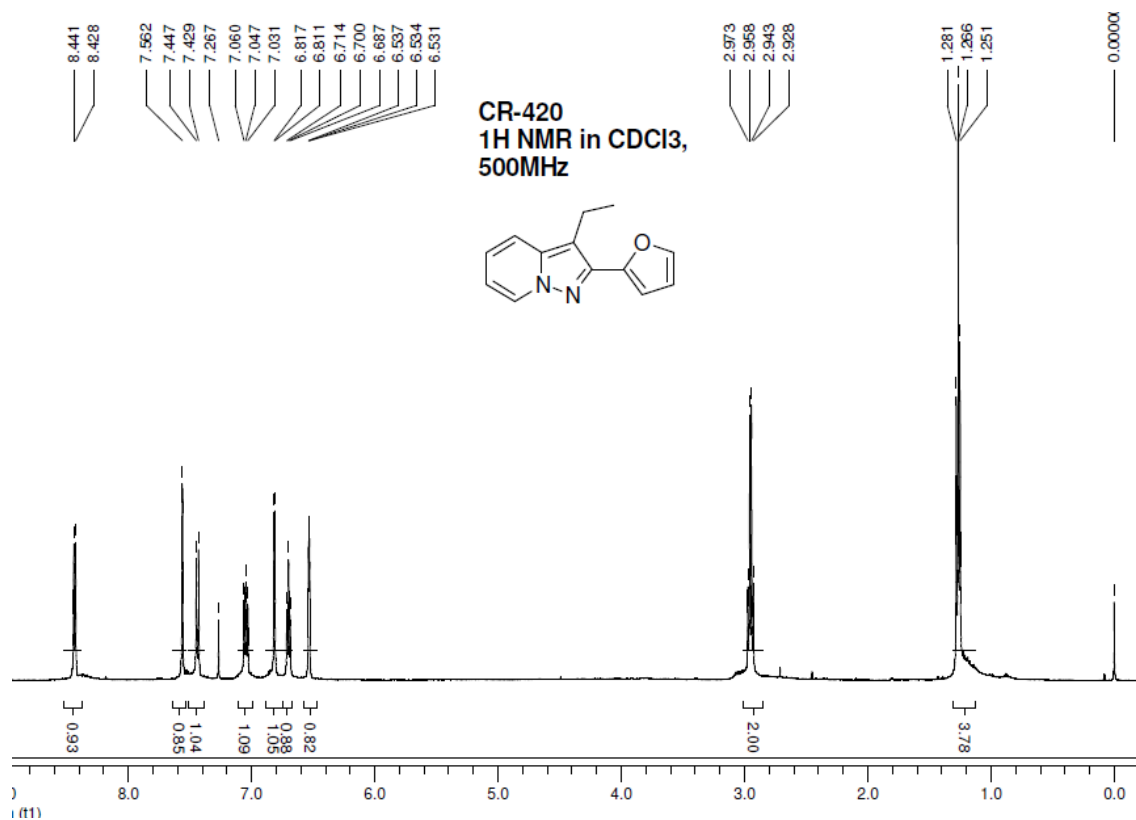

**<sup>1</sup>H NMR of 3al**

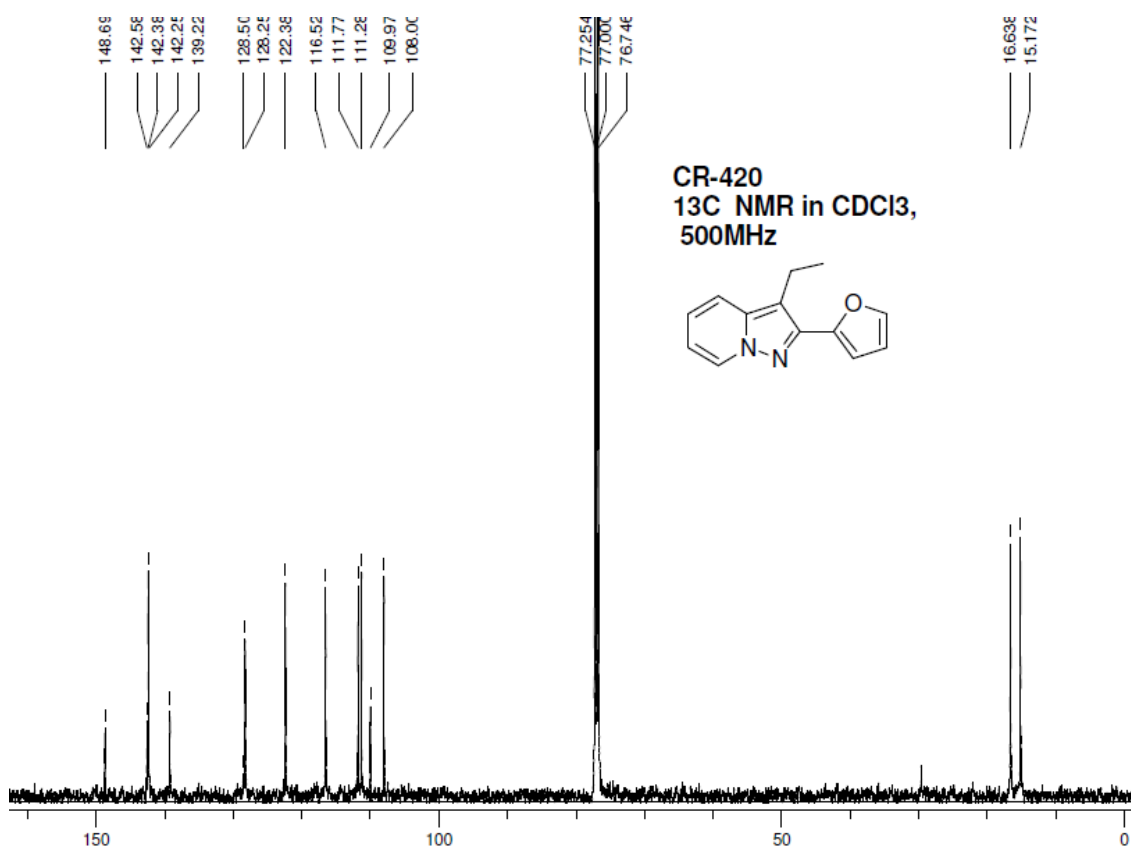

**<sup>13</sup>C NMR of 3al**

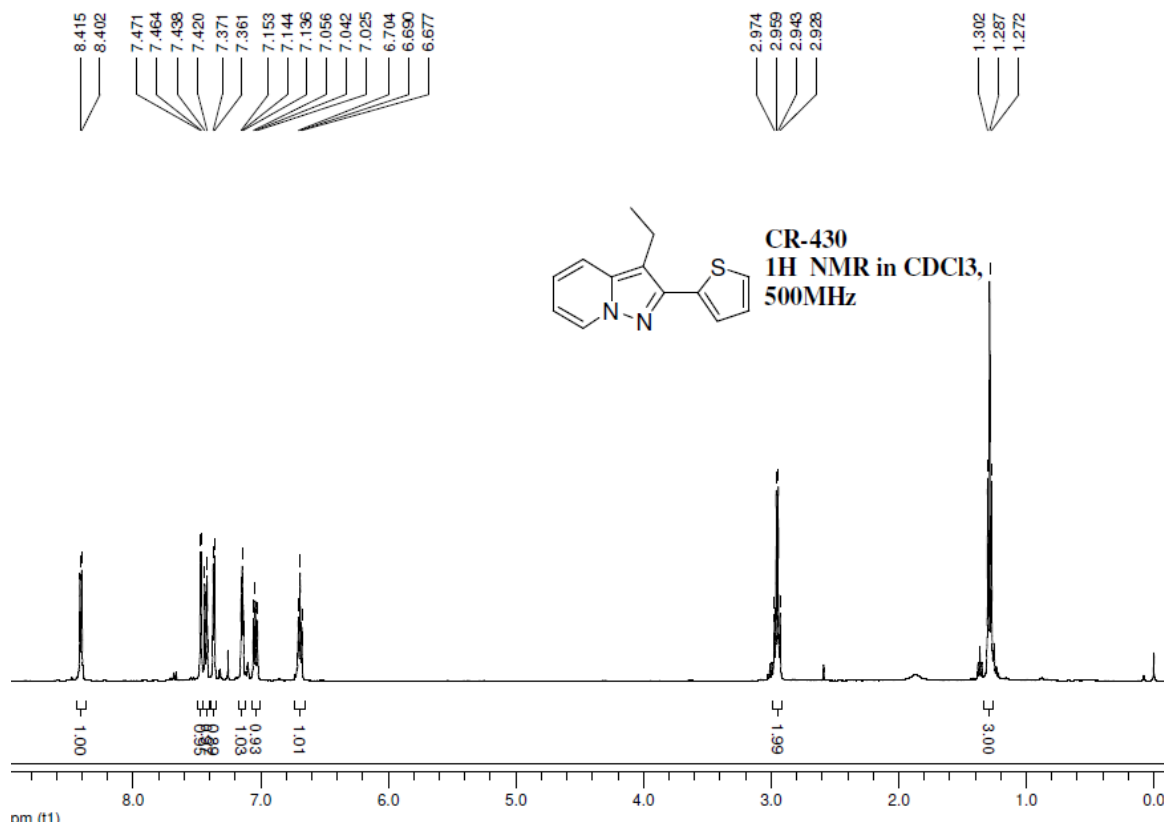

1H NMR of 3am

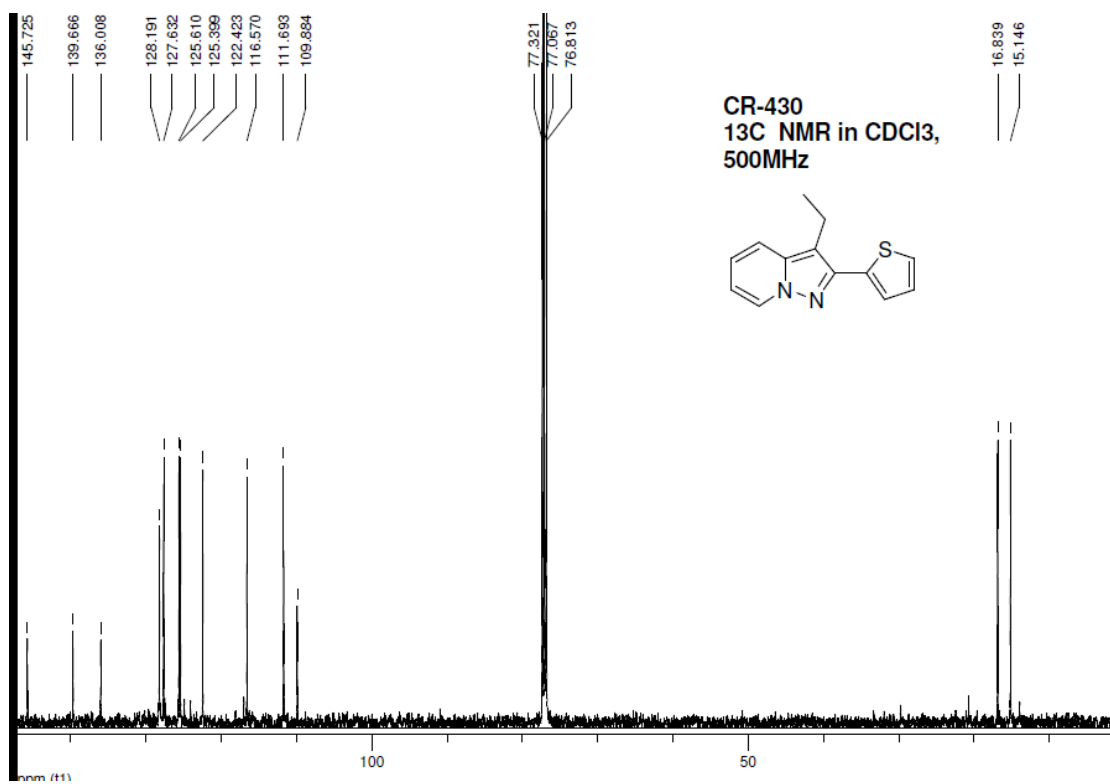

13C NMR of 3am

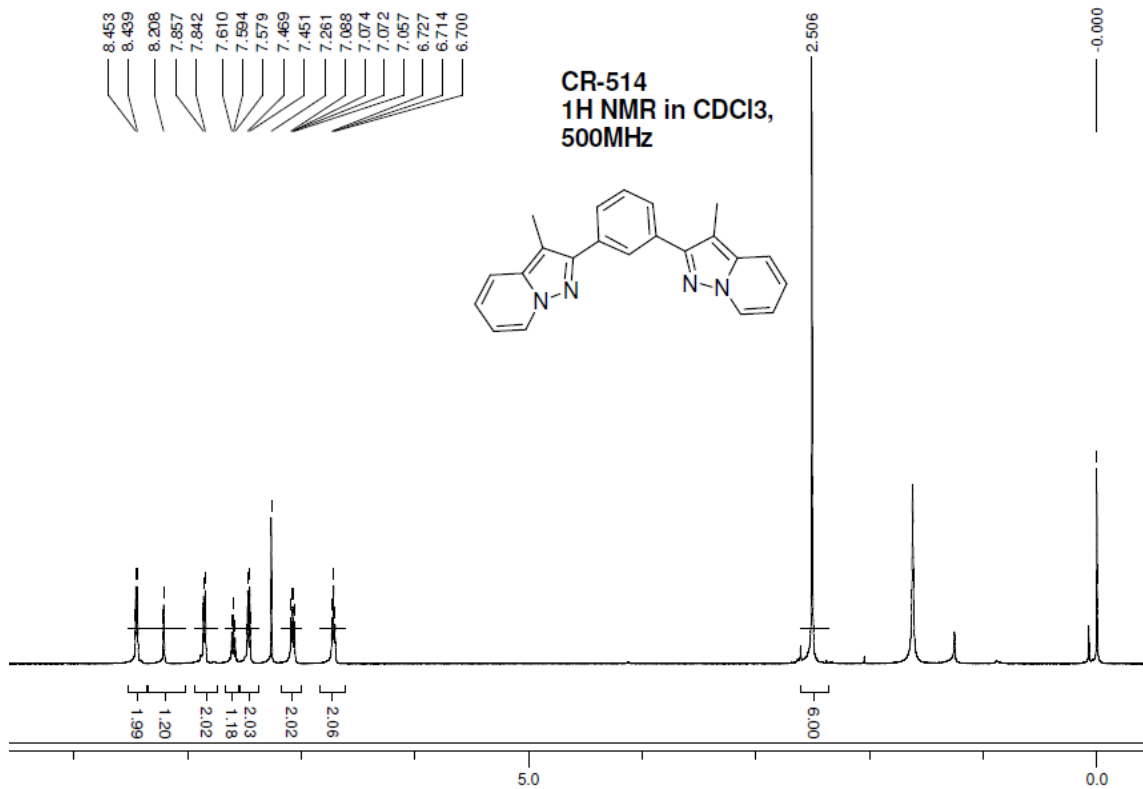

1H NMR of 3an

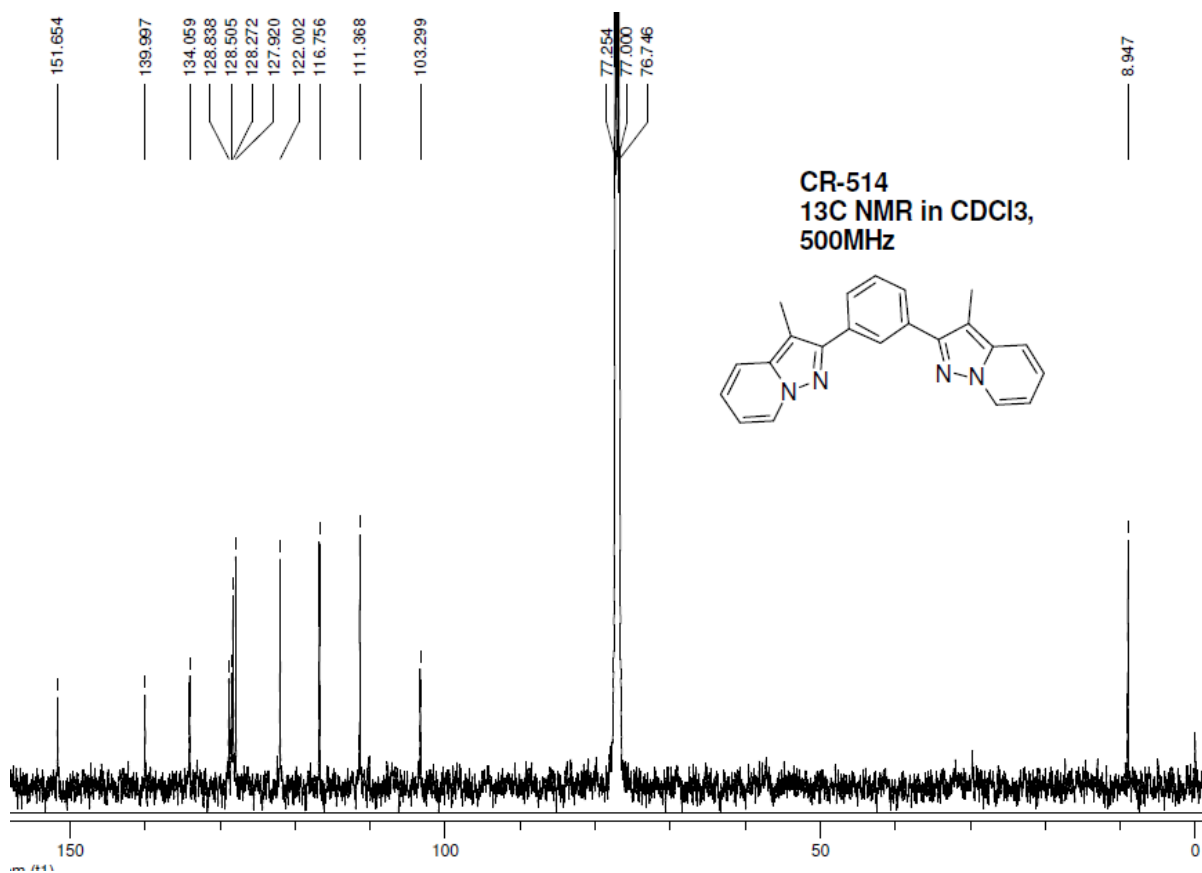

13C NMR of 3an

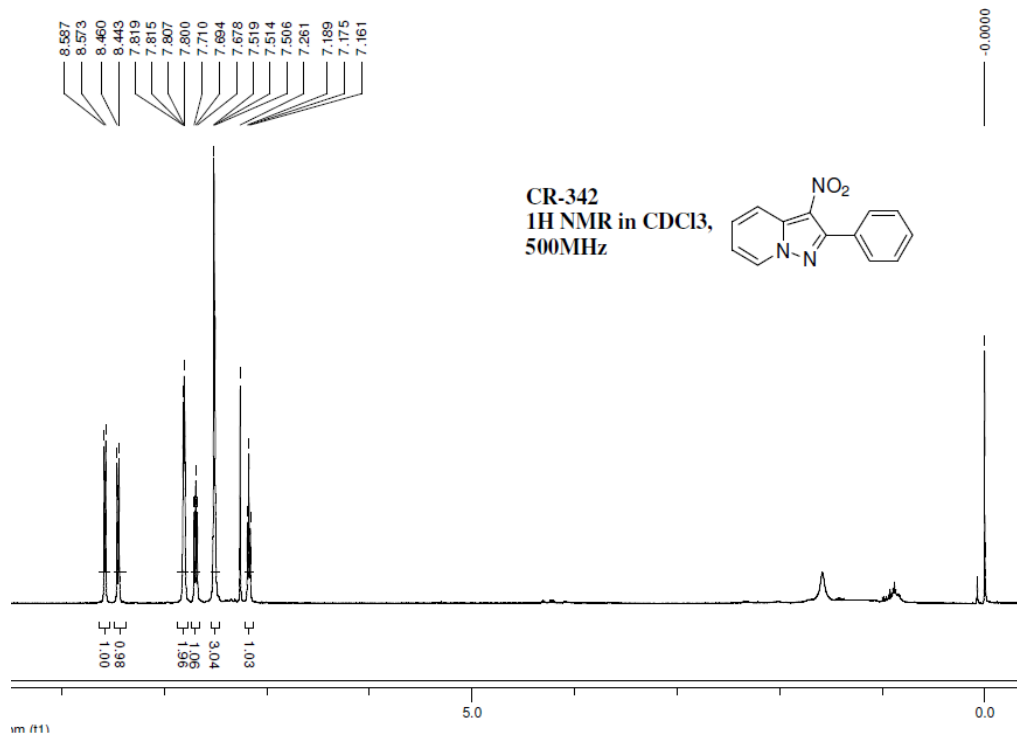

**<sup>1</sup>H NMR of 5a**

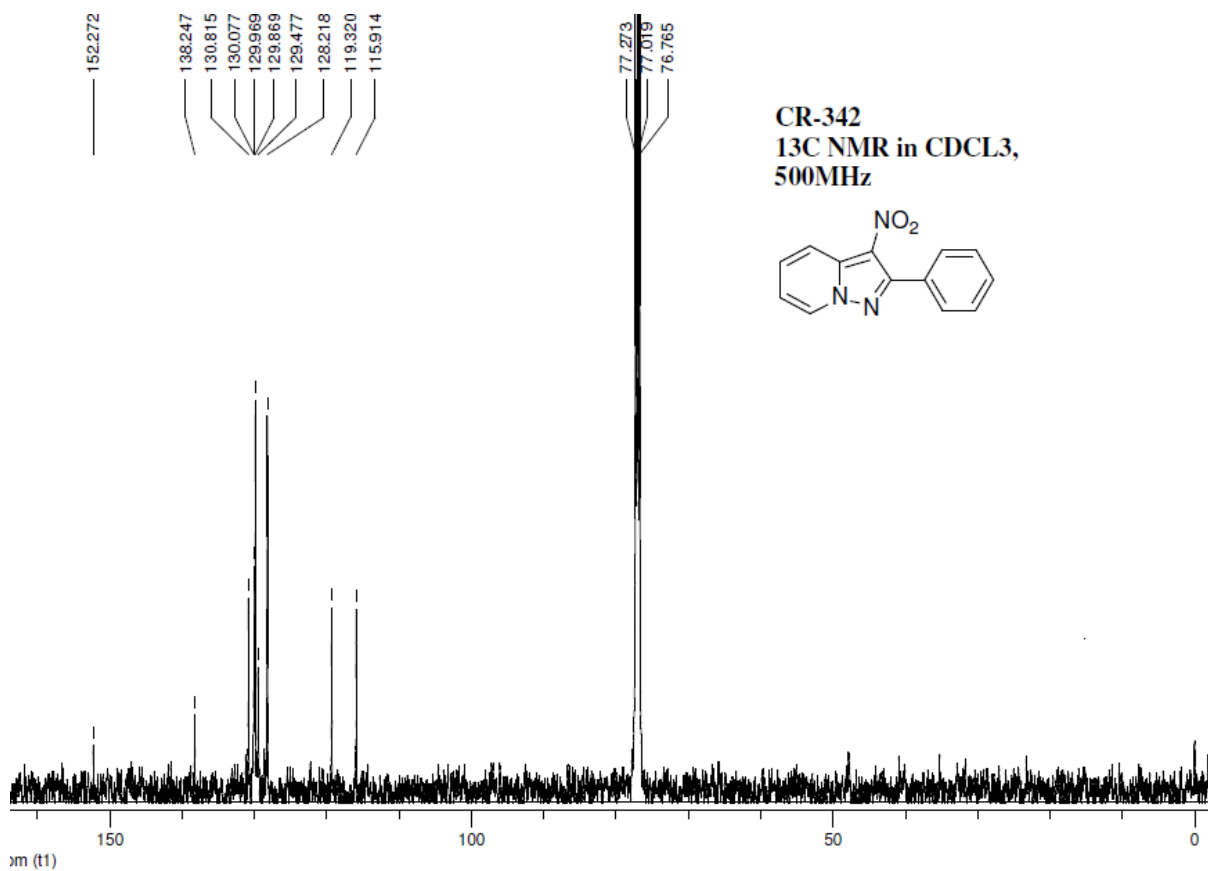

**<sup>13</sup>C NMR of 5a**

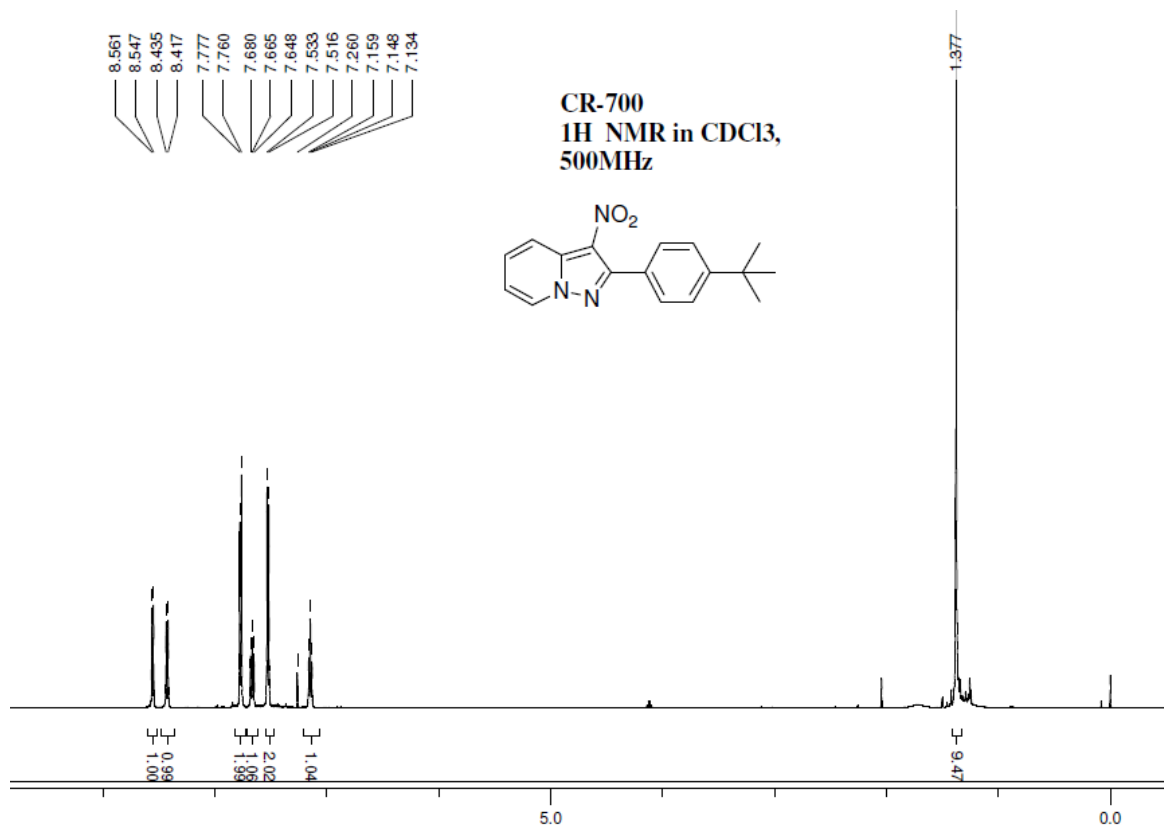

**<sup>1</sup>H NMR of 5b**

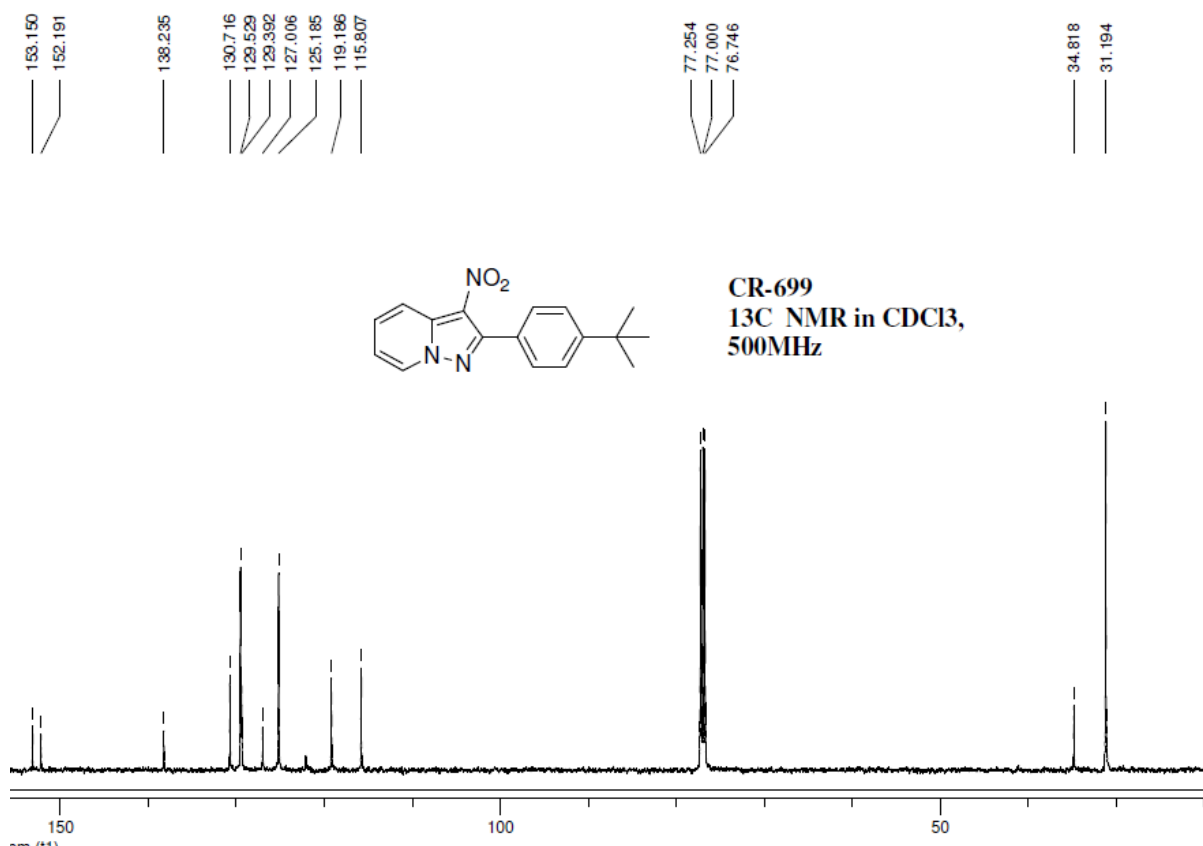

**<sup>13</sup>C NMR of 5b**

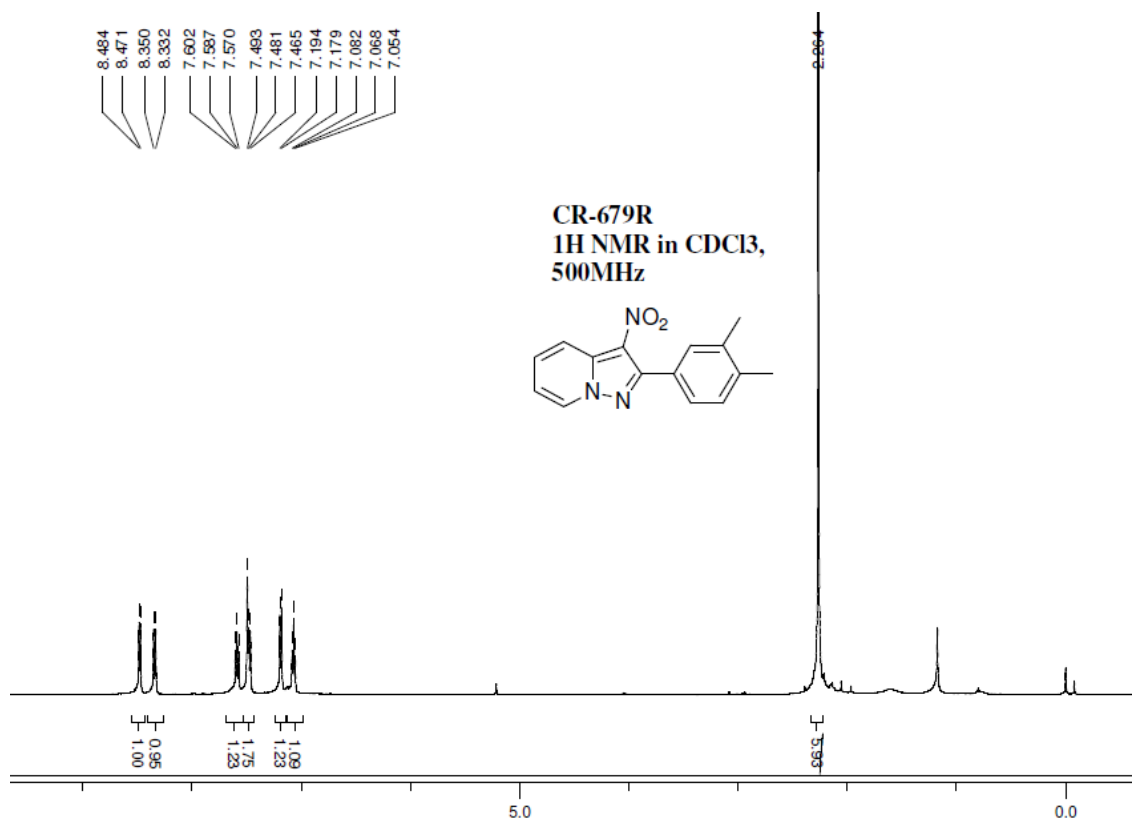

1H NMR of 5c

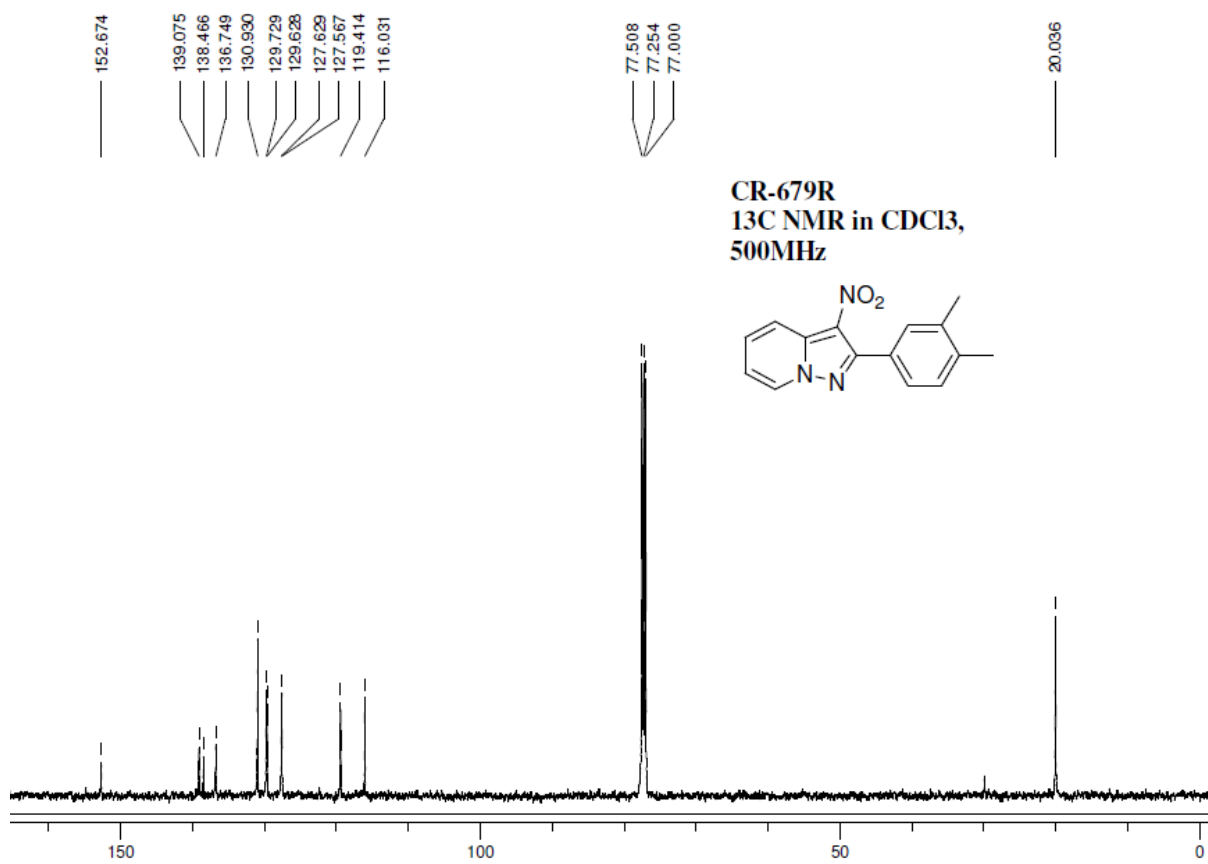

13C NMR of 5c

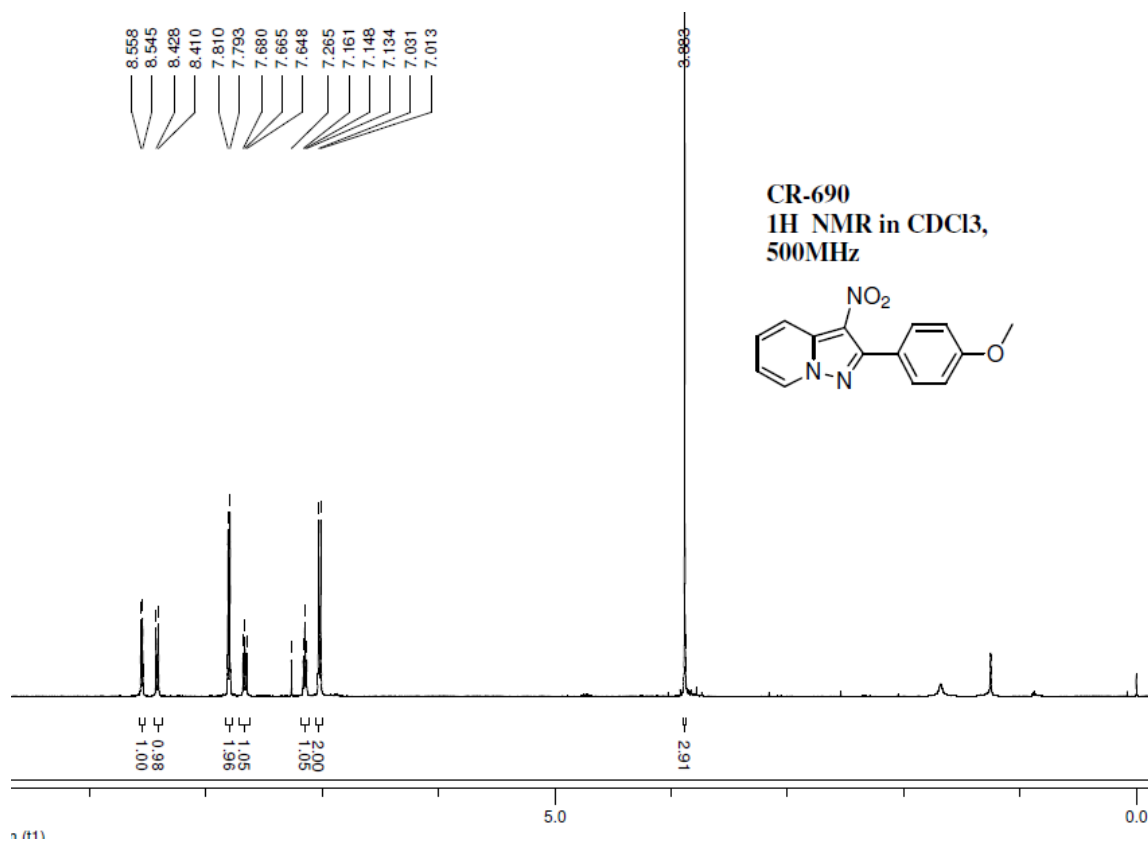

**<sup>1</sup>H NMR of 5d**

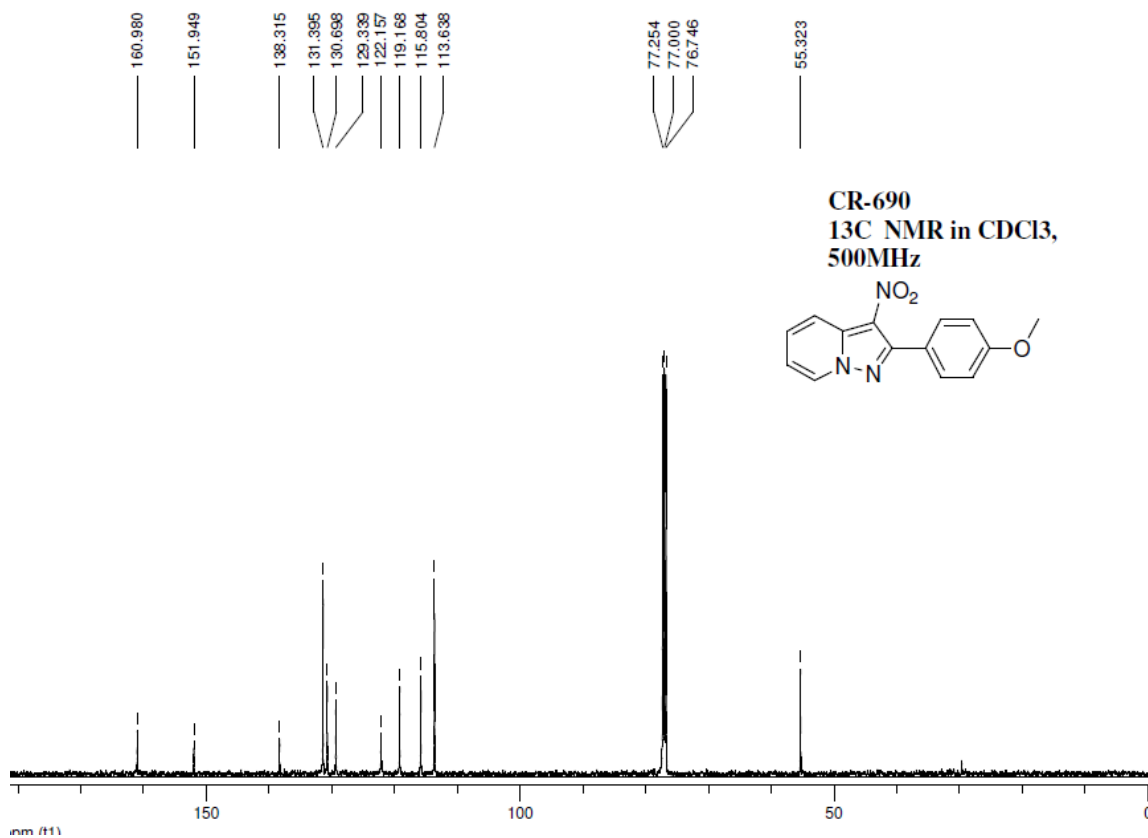

**<sup>13</sup>C NMR of 5d**





8.578  
8.565  
8.450  
8.432  
7.775  
7.758  
7.722  
7.706  
7.690  
7.486  
7.469  
7.264  
7.206  
7.192  
7.178

CR-671  
1H NMR in CDCl<sub>3</sub>,  
500MHz

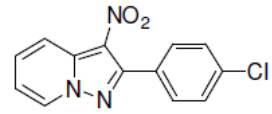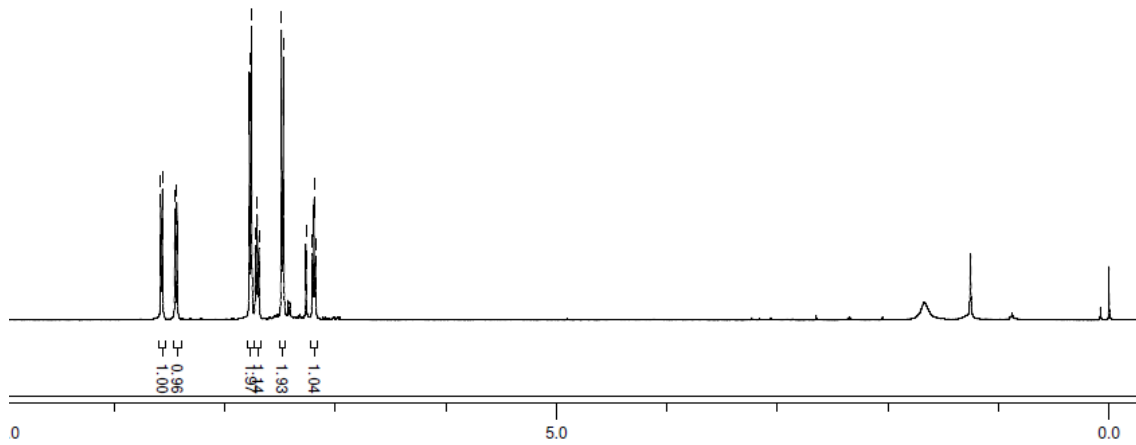

1H NMR of 5f

150.044  
137.227  
135.192  
130.281  
130.022  
128.456  
128.325  
127.475  
126.359  
118.289  
115.120

CR-671  
13C NMR in CDCl<sub>3</sub>,  
500MHz

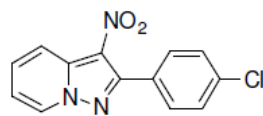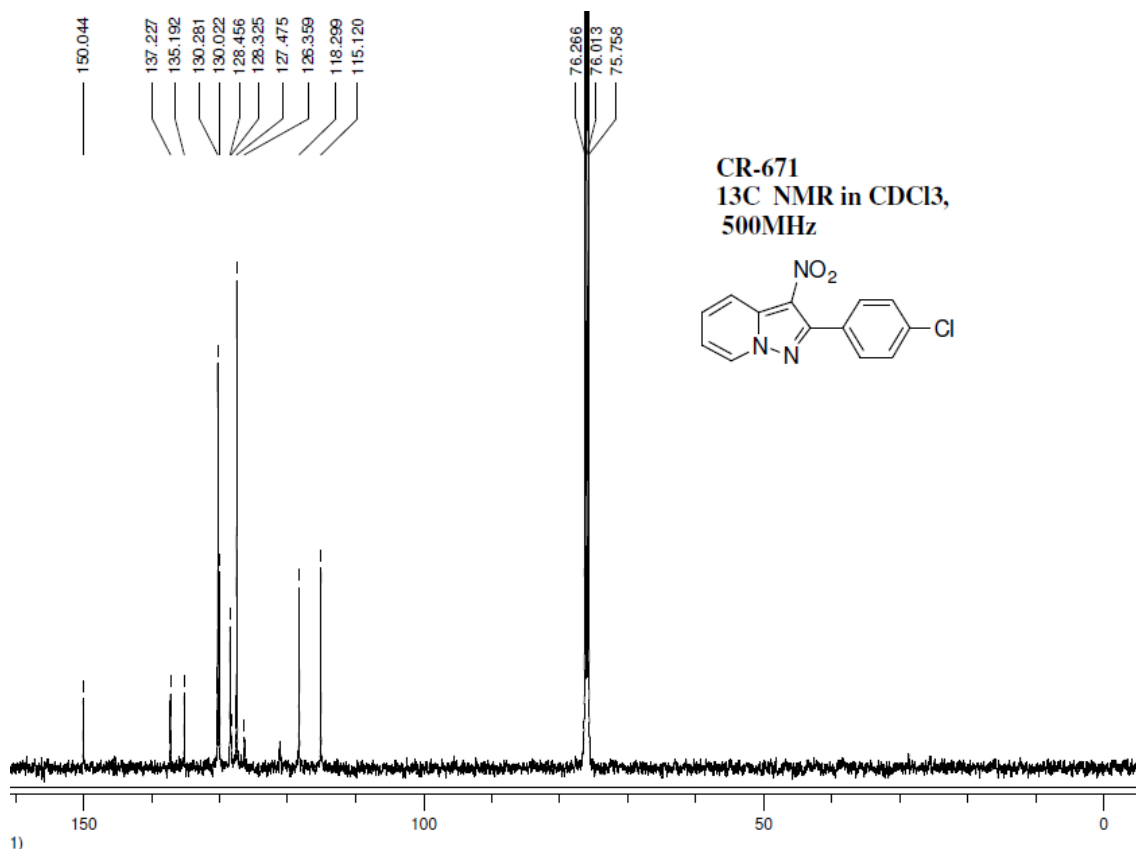

13C NMR of 5f

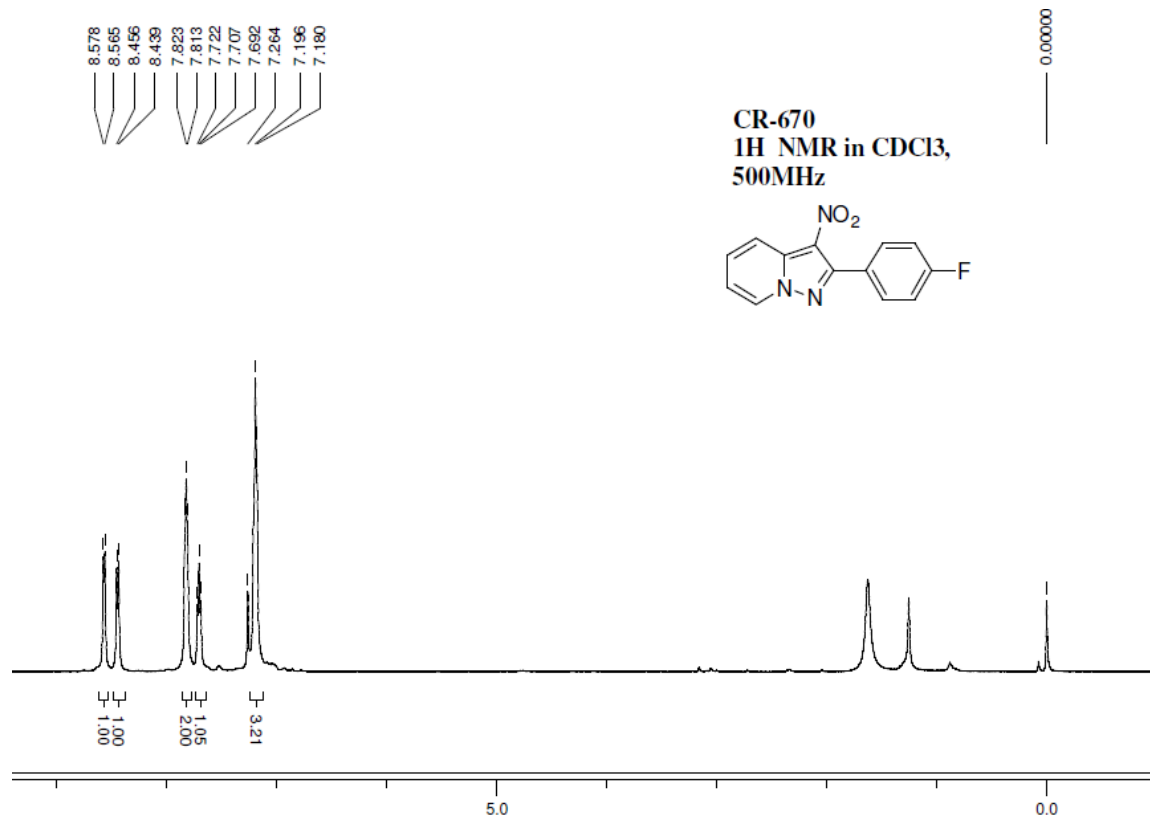

1H NMR of 5g

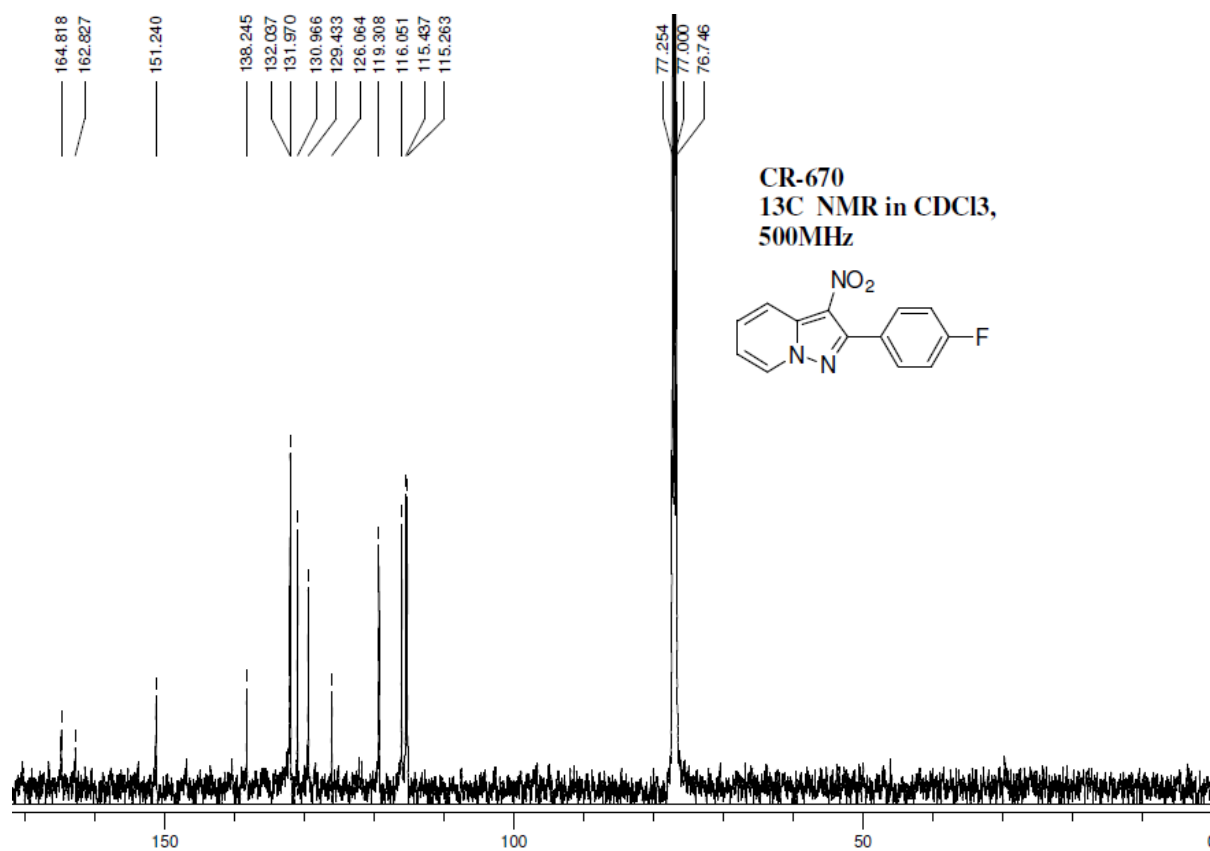

13C NMR of 5g

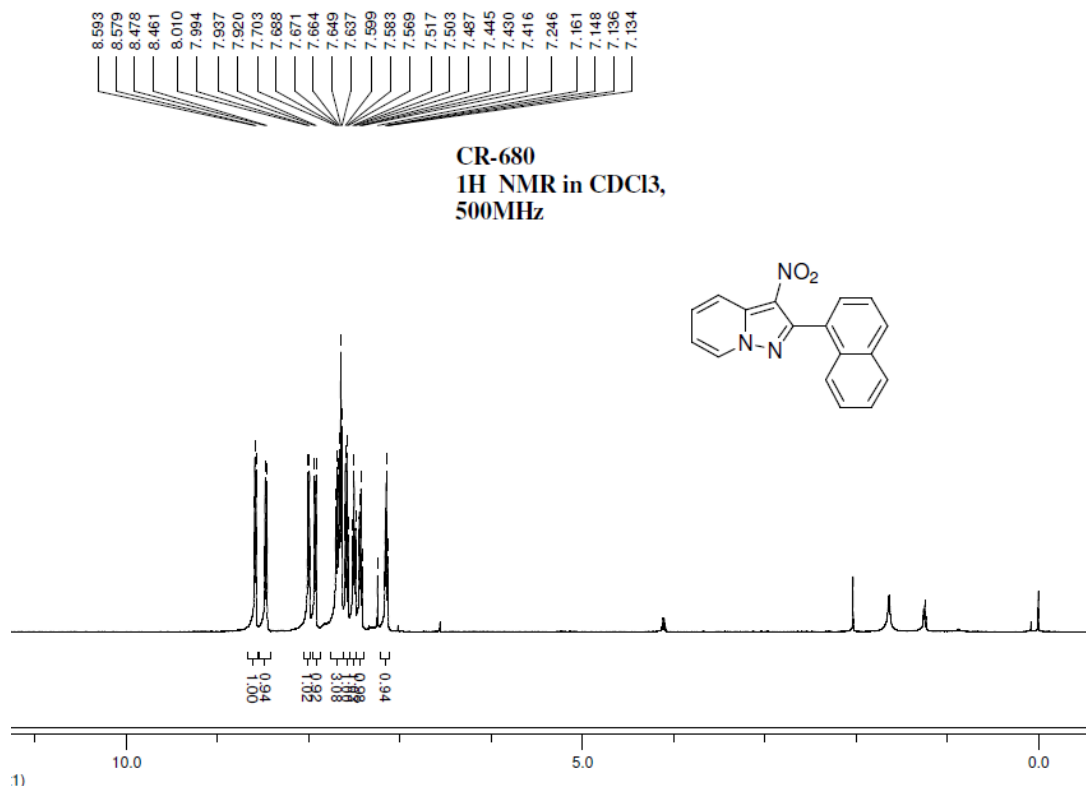

**<sup>1</sup>H NMR of 5h**

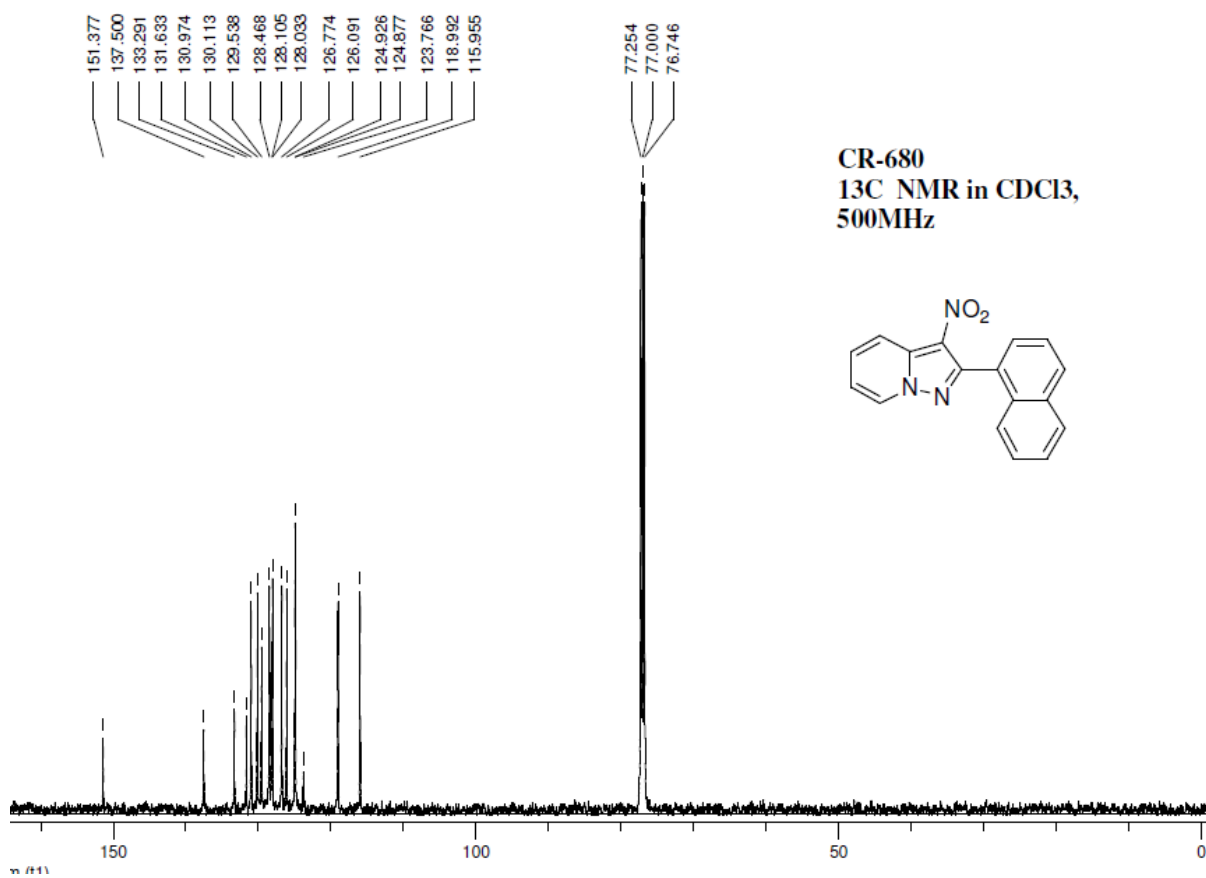

**<sup>13</sup>C NMR of 5g**

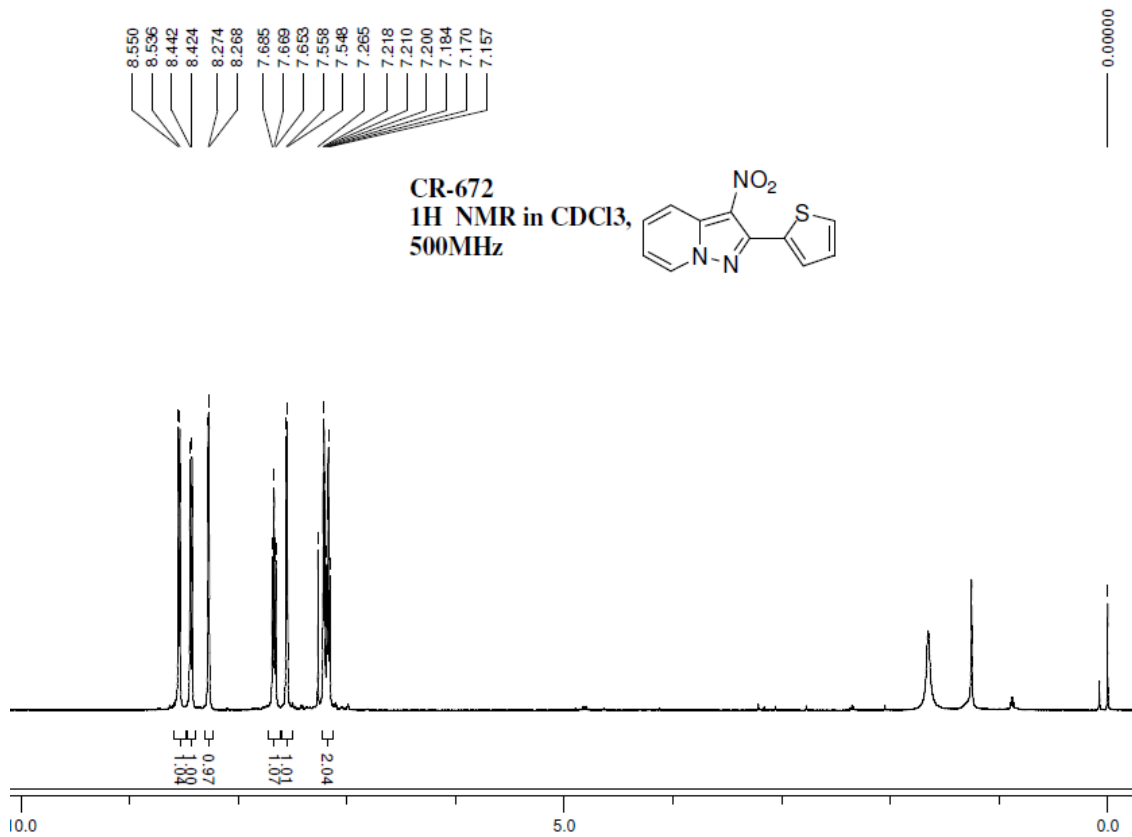

**<sup>1</sup>H NMR of 5h**

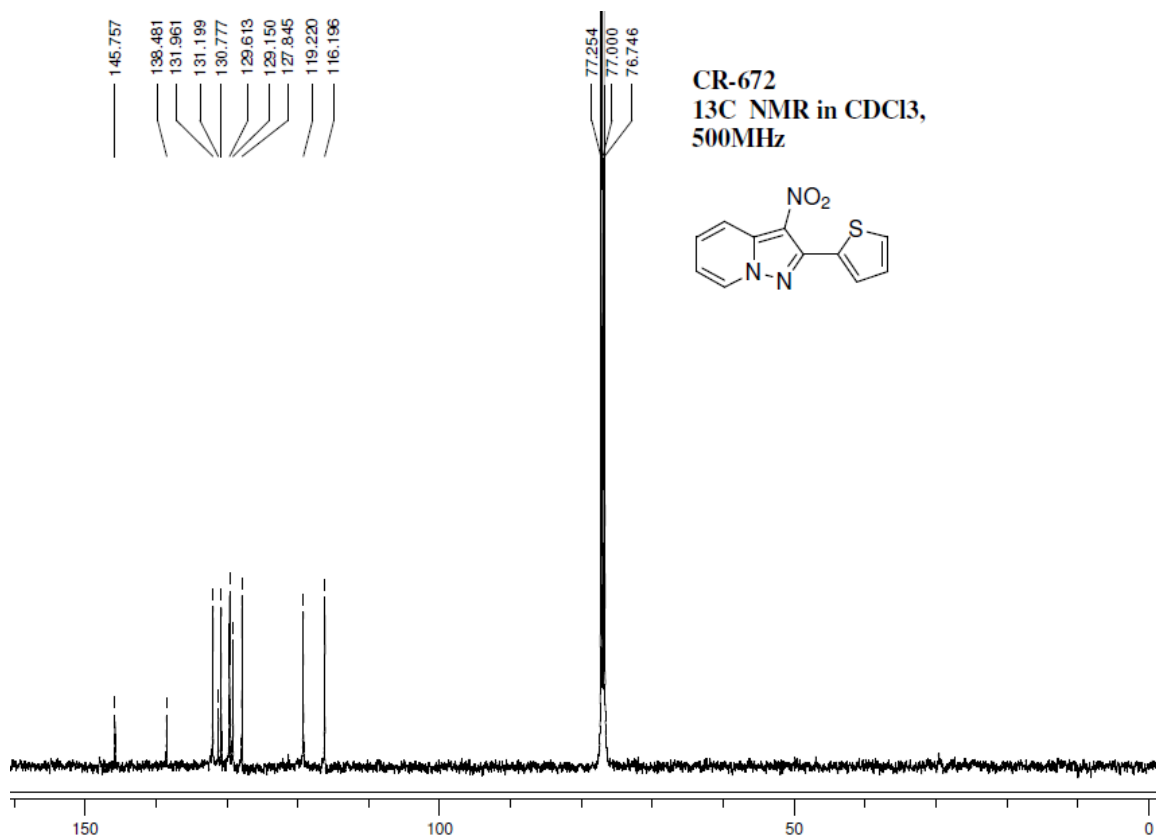

**<sup>13</sup>C NMR of 5h**
